# Supplementary material for: Copper-catalyzed, silver-mediated formal [3+2] cycloaddition of simple alkynes with β-ketoesters through propargylic C(sp3)–H functionalization
Source: Royal Society of Chemistry journal article supplement (doi:10.1039/c8cc08013e), 2018-01-01

# Copper-catalyzed, silver-mediated formal [3+2] cycloaddition of simple alkynes with $\beta$ -ketoesters though propargylic C(sp<sup>3</sup>)-H functionalization

Zhen-Ting Liu and Xiang-Ping Hu\*

*Dalian Institute of Chemical Physics, Chinese Academy of Sciences, Dalian 116023, China*  
xiangping@dicp.ac.cn

## Supporting Information

|                                                                                    |      |
|------------------------------------------------------------------------------------|------|
| General Information .....                                                          | S-2  |
| General Procedure for Copper-Catalyzed Formal [3+2] Cycloaddition .....            | S-2  |
| Preparation of Cu-acetylide <b>6</b> and Ag-acetylide <b>7</b> .....               | S-9  |
| Experimental procedure for control experiments eq. <b>3</b> and eq. <b>4</b> ..... | S-9  |
| Transformation of cycloadduct via catalytic decarboxylative coupling .....         | S-10 |
| References .....                                                                   | S-12 |
| <sup>1</sup> H NMR and <sup>13</sup> C NMR Spectra .....                           | S-13 |

## General Information

All reactions were carried out under a nitrogen atmosphere. Solvents were purified by standard procedure before use. Commercial reagents were used without further purification. Flash chromatography was performed on silica gel 60 (40-63 $\mu$ m, 60Å). Thin layer chromatography (TLC) was performed on glass plates coated with silica gel 60 with F254 indicator. Proton nuclear magnetic resonance ( $^1\text{H}$  NMR) spectra were recorded on a Bruker 400 MHz spectrometer. Chemical shifts for protons are reported in parts per million downfield from tetramethylsilane and are referenced to residual protium in the NMR solvent ( $\text{CDCl}_3 = \delta$  7.26). Carbon nuclear magnetic resonance ( $^{13}\text{C}$  NMR) spectra were recorded on a Bruker 100 MHz spectrometer. Chemical shifts for carbon are reported in parts per million downfield from tetramethylsilane and are referenced to the carbon resonances of the solvent ( $\text{CDCl}_3 = \delta$  77.07). Data are represented as follows: chemical shift, multiplicity (br = broad, s = singlet, d = doublet, t = triplet, q = quartet, m = multiplet), coupling constants in Hertz (Hz), integration. Only the most important and relevant frequencies are reported. ESI HRMS spectra were recorded on BioTOF Q. Aryl aryl propyne derivatives **1**<sup>1</sup> and  $\beta$ -ketoesters **2**<sup>2</sup> were prepared following the procedure described in the literature. **1k** was purchased from commercial sources (CAS: 1823-14-9).

### General procedure for Copper-Catalyzed Formal [3+2] Cycloaddition

A solution of CuI (1.9 mg, 0.01 mmol) and 1,10-Phenanthroline hydrate (2.2 mg, 0.011 mmol) in 1 mL of anhydrous ethanol placed in an oven-dried Schlenk flask was stirred at room temperature under a nitrogen atmosphere for 1 h. A solution of propynyl arenes **1** (0.44 mmol),  $\beta$ -ketoesters **2** (0.2 mmol) and  $\text{Ag}_2\text{CO}_3$  (66.2 mg, 0.24 mmol) in 2 mL of anhydrous ethanol was added. The reaction mixture was allowed to stir for 24 h at 80 °C. Then the reaction mixture was cooled to room temperature, DBU (36.5 mg, 0.24 mmol) was added directly to the resulting reaction mixture without further purification and continued stirring at 80 °C being monitored by TLC. The reaction mixture was then filtered, washed with dichloromethane (10 mL) and concentrated under vacuum. The residue was purified by silica gel chromatography to afford highly functionalized furans **3**.

**Ethyl 5-methyl-2,4-diphenylfuran-3-carboxylate (3aa).** Pale yellow oil was obtained in 93% yield

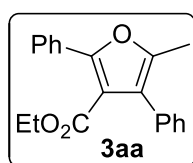

after purification with column chromatography on silica gel (petroleum ether/ethyl acetate, 100/1).  $^1\text{H}$  NMR (400 MHz,  $\text{CDCl}_3$ )  $\delta$  7.85–7.82 (m, 2H), 7.43–7.29 (m, 8H), 4.09 (q,  $J$  = 7.1 Hz, 2H), 2.32 (s, 3H), 0.97 (t,  $J$  = 7.1 Hz, 3H);  $^{13}\text{C}$  NMR (101

MHz, CDCl<sub>3</sub>)  $\delta$  164.7, 154.0, 148.5, 133.0, 130.1, 129.6, 128.8, 128.2, 128.0, 127.6, 127.0, 123.0, 114.8, 60.5, 13.7, 12.1. The spectrum is in accordance with the literature<sup>3</sup>.

**Ethyl 2-(2-chlorophenyl)-5-methyl-4-phenylfuran-3-carboxylate (3ab).** Pale yellow oil was

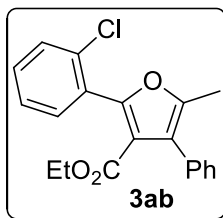

obtained in 53% yield after purification with column chromatography on silica gel (petroleum ether/ethyl acetate, 100/1). <sup>1</sup>H NMR (400 MHz, CDCl<sub>3</sub>)  $\delta$  7.55–7.53 (m, 1H), 7.48–7.46 (m, 1H), 7.42–7.31 (m, 7H), 4.02 (q,  $J$  = 7.1 Hz, 2H), 2.32 (s, 3H), 0.92 (t,  $J$  = 7.1 Hz, 3H); <sup>13</sup>C NMR (101 MHz, CDCl<sub>3</sub>)  $\delta$  163.4, 152.8, 149.4, 134.1, 132.5, 131.9, 130.4, 130.3, 130.1, 129.7, 127.9, 127.1, 126.3, 122.2, 116.8, 60.2, 13.6, 12.1. HRMS calc. for C<sub>20</sub>H<sub>17</sub>ClO<sub>3</sub> [M+Na]<sup>+</sup>: 363.0764, found: 363.0764.

**Ethyl 2-(3-chlorophenyl)-5-methyl-4-phenylfuran-3-carboxylate (3ac).** Pale yellow oil was

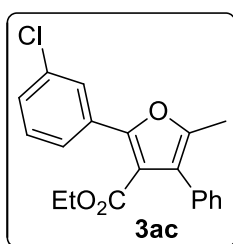

obtained in 91% yield after purification with column chromatography on silica gel (petroleum ether/ethyl acetate, 100/1). <sup>1</sup>H NMR (400 MHz, CDCl<sub>3</sub>)  $\delta$  7.86–7.85 (m, 1H), 7.77–7.74 (m, 1H), 7.41–7.24 (m, 8H), 4.11 (q,  $J$  = 7.1 Hz, 2H), 2.32 (s, 3H), 1.00 (t,  $J$  = 7.1 Hz, 3H); <sup>13</sup>C NMR (101 MHz, CDCl<sub>3</sub>)  $\delta$  164.4, 152.2, 149.0, 134.2, 132.7, 131.7, 129.6, 129.5, 128.7, 128.1, 127.5, 127.2, 125.6, 123.3, 115.7, 60.7, 13.6, 12.1. HRMS calc. for C<sub>20</sub>H<sub>17</sub>ClO<sub>3</sub> [M+Na]<sup>+</sup>: 363.0764, found: 363.0768.

**Ethyl 2-(4-chlorophenyl)-5-methyl-4-phenylfuran-3-carboxylate (3ad).** Pale yellow solid was

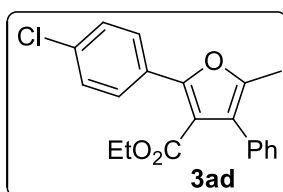

obtained in 90% yield after purification with column chromatography on silica gel (petroleum ether/ethyl acetate, 100/1). M.p.: 66–68 °C. <sup>1</sup>H NMR (400 MHz, CDCl<sub>3</sub>)  $\delta$  7.82–7.80 (m, 2H), 7.41–7.36 (m, 4H), 7.34–7.24 (m, 3H), 4.08 (q,  $J$  = 7.1 Hz, 2H), 2.31 (s, 3H), 0.97 (t,  $J$  = 7.1 Hz, 3H); <sup>13</sup>C NMR (101 MHz, CDCl<sub>3</sub>)  $\delta$  164.5, 152.9, 148.8, 134.7, 132.9, 129.6, 128.9, 128.6, 128.4, 128.0, 127.1, 123.2, 115.2, 60.6, 13.6, 12.1. HRMS calc. for C<sub>20</sub>H<sub>17</sub>ClO<sub>3</sub> [M+Na]<sup>+</sup>: 363.0764, found: 363.0766.

**Ethyl 2-(4-fluorophenyl)-5-methyl-4-phenylfuran-3-carboxylate (3ae).** Pale yellow solid was

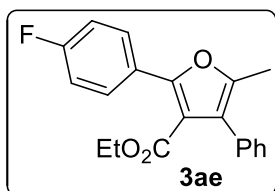

obtained in 89% yield after purification with column chromatography on silica gel (petroleum ether/ethyl acetate, 100/1). M.p.: 66–68 °C. <sup>1</sup>H NMR (400 MHz, CDCl<sub>3</sub>)  $\delta$  7.88–7.84 (m, 2H), 7.41–7.36 (m, 2H), 7.34–7.28 (m, 3H), 7.13–7.08 (m, 2H), 4.07 (q,  $J$  = 7.1 Hz, 2H), 2.31 (s, 3H), 0.96 (t,  $J$  = 7.1 Hz, 3H); <sup>13</sup>C NMR (101 MHz, CDCl<sub>3</sub>)  $\delta$  164.5, 163.0 (d,  $J$  = 249.2 Hz), 153.5, 148.5, 133.0, 129.8 (d,  $J$  = 8.3 Hz), 129.6, 128.0, 127.1, 126.4 (d,  $J$  = 3.4 Hz), 123.0, 115.2 (d,  $J$  = 21.7 Hz), 114.6, 60.5, 13.6, 12.0. HRMS calc. for C<sub>20</sub>H<sub>17</sub>FO<sub>3</sub> [M+Na]<sup>+</sup>: 347.1059, found: 347.1054.

**Ethyl 2-(4-bromophenyl)-5-methyl-4-phenylfuran-3-carboxylate (3af).** Pale yellow solid was

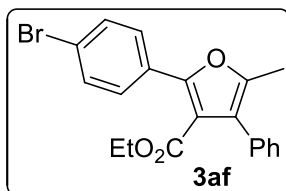

obtained in 82% yield after purification with column chromatography on silica gel (petroleum ether/ethyl acetate, 100/1). M.p.: 56–58 °C. <sup>1</sup>H NMR (400 MHz, CDCl<sub>3</sub>) δ 7.67–7.64 (m, 2H), 7.46–7.43 (m, 2H), 7.31–7.27 (m, 2H), 7.25–7.18 (m, 3H), 3.99 (q, *J* = 7.1 Hz, 2H), 2.22 (s, 3H), 0.88 (t, *J* = 7.1 Hz, 3H); <sup>13</sup>C NMR (101 MHz, CDCl<sub>3</sub>) δ 164.5, 152.9, 148.8, 132.9, 131.4, 129.6, 129.1, 129.0, 128.0, 127.1, 123.2, 123.0, 115.3, 60.6, 13.6, 12.1. HRMS calc. for C<sub>20</sub>H<sub>17</sub>BrO<sub>3</sub> [M+Na]<sup>+</sup>: 407.0259, found: 407.0265.

**Ethyl 2-(4-cyanophenyl)-5-methyl-4-phenylfuran-3-carboxylate (3ag).** Pale yellow solid was

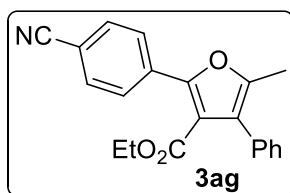

obtained in 60% yield after purification with column chromatography on silica gel (petroleum ether/ethyl acetate, 20/1). M.p.: 113–115 °C. <sup>1</sup>H NMR (400 MHz, CDCl<sub>3</sub>) δ 8.00 (d, *J* = 8.5 Hz, 2H), 7.69 (d, *J* = 8.5 Hz, 2H), 7.42–7.32 (m, 3H), 7.29–7.26 (m, 2H), 4.10 (q, *J* = 7.1 Hz, 2H), 2.35 (s, 3H), 0.97 (t, *J* = 7.1 Hz, 3H); <sup>13</sup>C NMR (101 MHz, CDCl<sub>3</sub>) δ 164.3, 151.1, 150.0, 134.0, 132.4, 132.0, 129.5, 128.1, 127.5, 127.3, 123.8, 118.8, 117.3, 111.7, 60.9, 13.6, 12.2. HRMS calc. for C<sub>21</sub>H<sub>17</sub>NO<sub>3</sub> [M+H]<sup>+</sup>: 332.1287, found: 332.1282.

**Ethyl 5-methyl-4-phenyl-2-(p-tolyl)furan-3-carboxylate (3ah).** Pale yellow oil was obtained in 94%

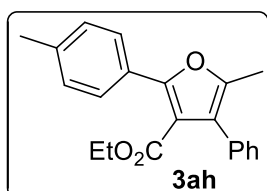

yield after purification with column chromatography on silica gel (petroleum ether/ethyl acetate, 100/1). <sup>1</sup>H NMR (400 MHz, CDCl<sub>3</sub>) δ 7.74–7.72 (m, 2H), 7.40–7.36 (m, 2H), 7.3–7.28 (m, 3H), 7.23–7.21 (m, 2H), 4.08 (q, *J* = 7.1 Hz, 2H), 2.38 (s, 3H), 2.31 (s, 3H), 0.98 (t, *J* = 7.1 Hz, 3H); <sup>13</sup>C NMR (101 MHz, CDCl<sub>3</sub>) δ 164.7, 154.4, 148.1, 138.8, 133.2, 129.6, 128.9, 128.0, 127.6, 127.4, 127.0, 122.9, 114.3, 60.4, 21.4, 13.7, 12.1. HRMS calc. for C<sub>21</sub>H<sub>20</sub>O<sub>3</sub> [M+Na]<sup>+</sup>: 343.1310, found: 343.1308.

**Ethyl 2-(4-methoxyphenyl)-5-methyl-4-phenylfuran-3-carboxylate (3ai).** White solid was

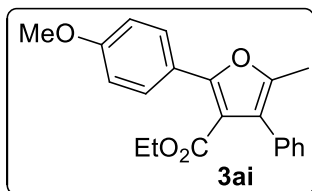

obtained in 88% yield after purification with column chromatography on silica gel (petroleum ether/ethyl acetate, 50/1). M.p.: 54–56 °C. <sup>1</sup>H NMR (400 MHz, CDCl<sub>3</sub>) δ 7.82–7.80 (m, 2H), 7.40–7.36 (m, 2H), 7.33–7.28 (m, 3H), 6.96–6.94 (m, 2H), 4.07 (q, *J* = 7.1 Hz, 2H), 3.84 (s, 3H), 2.30 (s, 3H), 0.97 (t, *J* = 7.1 Hz, 3H); <sup>13</sup>C NMR (101 MHz, CDCl<sub>3</sub>) δ 164.7, 160.1, 154.6, 147.8, 133.3, 129.7, 129.3, 127.9, 126.9, 122.9, 122.8, 113.6, 60.3, 55.3, 13.7, 12.0. HRMS calc. for C<sub>21</sub>H<sub>20</sub>O<sub>4</sub> [M+Na]<sup>+</sup>: 359.1259, found: 359.1251.

**Ethyl 2-(4-hydroxyphenyl)-5-methyl-4-phenylfuran-3-carboxylate (3aj).** White solid was

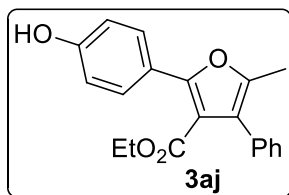

obtained in 31% yield after purification with column chromatography on silica gel (petroleum ether/ethyl acetate, 5/1). M.p.: 140–142 °C. <sup>1</sup>H NMR (400 MHz, CDCl<sub>3</sub>) δ 7.74 (d, *J* = 8.7 Hz, 2H), 7.50–7.15 (m, 6H), 6.85 (d, *J* = 8.7 Hz, 1H), 5.70 (s, 1H), 4.07 (q, *J* = 7.1 Hz, 2H), 2.30 (s, 3H), 0.95 (t, *J* = 7.1 Hz, 3H); <sup>13</sup>C NMR (101 MHz, CDCl<sub>3</sub>) δ 165.1, 156.5, 155.0, 147.8, 141.5, 133.3, 129.6, 129.6, 127.9, 126.9, 122.7, 115.2, 113.4, 60.5, 13.6, 12.0. HRMS calc. for C<sub>20</sub>H<sub>18</sub>O<sub>4</sub> [M+H]<sup>+</sup>: 323.1283, found: 323.1286.

**Ethyl 2-(4-acetamidophenyl)-5-methyl-4-phenylfuran-3-carboxylate (3ak).** Pale yellow solid was

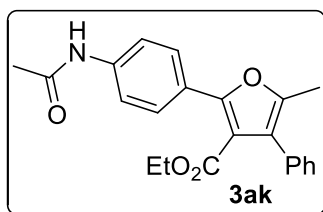

obtained in 89% yield after purification with column chromatography on silica gel (petroleum ether/ethyl acetate, 1/1). M.p.: 144–146 °C. <sup>1</sup>H NMR (400 MHz, CDCl<sub>3</sub>) δ 8.17 (s, 1H), 7.78 (d, *J* = 8.4 Hz, 2H), 7.56 (d, *J* = 8.5 Hz, 2H), 7.39–7.35 (m, 2H), 7.32–7.25 (m, 3H), 4.09 (q, *J* = 7.1 Hz, 2H), 2.30 (s, 3H), 2.12 (s, 3H), 0.98 (t, *J* = 7.2 Hz, 3H); <sup>13</sup>C NMR (101 MHz, CDCl<sub>3</sub>) δ 168.9, 165.0, 154.0, 148.3, 138.7, 133.0, 129.6, 128.3, 128.0, 127.0, 125.7, 122.9, 119.3, 114.2, 60.6, 24.5, 13.6, 12.0. HRMS calc. for C<sub>22</sub>H<sub>21</sub>NO<sub>4</sub> [M+H]<sup>+</sup>: 364.1549, found: 364.1544.

**Ethyl 5-methyl-2-(naphthalen-2-yl)-4-phenylfuran-3-carboxylate (3al).** Pale yellow solid was

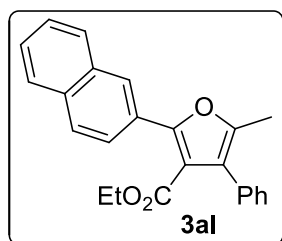

obtained in 89% yield after purification with column chromatography on silica gel (petroleum ether/ethyl acetate, 100/1). M.p.: 106–108 °C. <sup>1</sup>H NMR (400 MHz, CDCl<sub>3</sub>) δ 8.37 (s, 1H), 7.94–7.82 (m, 4H), 7.50–7.46 (m, 2H), 7.42–7.38 (m, 2H), 7.34–7.30 (m, 3H), 4.12 (q, *J* = 7.1 Hz, 2H), 2.36 (s, 3H), 0.99 (t, *J* = 7.1 Hz, 3H); <sup>13</sup>C NMR (101 MHz, CDCl<sub>3</sub>) δ 164.8, 154.0, 148.7, 133.3, 133.1, 133.0, 129.6, 128.6, 128.0, 127.8, 127.7, 127.5, 127.1, 127.1, 126.7, 126.4, 125.1, 123.2, 115.2, 60.6, 13.7, 12.2. HRMS calc. for C<sub>24</sub>H<sub>20</sub>O<sub>3</sub> [M+Na]<sup>+</sup>: 379.1310, found: 379.1305.

**Ethyl 5-methyl-4-phenyl-2-(thiophen-2-yl)furan-3-carboxylate (3am).** Pale yellow oil was

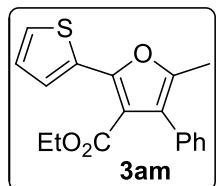

obtained in 94% yield after purification with column chromatography on silica gel (petroleum ether/ethyl acetate, 100/1). <sup>1</sup>H NMR (400 MHz, CDCl<sub>3</sub>) δ 7.89–7.88 (m, 1H), 7.29–7.25 (m, 6H), 7.10–7.08 (m, 1H), 4.11 (q, *J* = 7.1 Hz, 2H), 2.28 (s, 3H), 0.99 (t, *J* = 7.1 Hz, 3H); <sup>13</sup>C NMR (101 MHz, CDCl<sub>3</sub>) δ 164.1, 150.6, 148.1, 133.1, 131.8, 129.8, 127.8, 127.8, 127.3, 127.2, 127.0, 123.0, 113.2, 60.4, 13.7, 12.0. HRMS calc. for C<sub>18</sub>H<sub>16</sub>O<sub>3</sub>S [M+Na]<sup>+</sup>: 335.0718, found: 335.0711.

**Ethyl 2,5-dimethyl-4-phenylfuran-3-carboxylate (3an).** Pale yellow oil was obtained in 92% yield

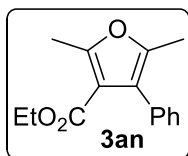

after purification with column chromatography on silica gel (petroleum ether/ethyl acetate, 100/1).  $^1\text{H}$  NMR (400 MHz,  $\text{CDCl}_3$ )  $\delta$  7.37–7.33 (m, 2H), 7.31–7.23 (m, 3H), 4.11 (q,  $J = 7.1$  Hz, 2H), 2.57 (s, 3H), 2.19 (s, 3H), 1.09 (t,  $J = 7.1$  Hz, 3H);  $^{13}\text{C}$  NMR (101 MHz,  $\text{CDCl}_3$ )  $\delta$  164.3, 157.4, 147.1, 133.3, 130.0, 127.6, 126.8, 121.4, 113.5, 59.8, 14.1, 14.0, 11.8. HRMS calc. for  $\text{C}_{15}\text{H}_{16}\text{O}_3$   $[\text{M}+\text{H}]^+$ : 245.1178, found: 245.1140.

**Ethyl 2-isopropyl-5-methyl-4-phenylfuran-3-carboxylate(3ao).** Pale yellow oil was obtained in 81%

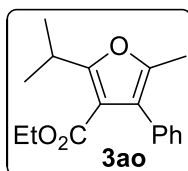

yield after purification with column chromatography on silica gel (petroleum ether/ethyl acetate, 100/1).  $^1\text{H}$  NMR (400 MHz,  $\text{CDCl}_3$ )  $\delta$  7.37–7.32 (m, 2H), 7.30–7.23 (m, 3H), 4.09 (q,  $J = 7.1$  Hz, 2H), 3.72 (p,  $J = 7.0$  Hz, 1H), 2.20 (s, 3H), 1.30 (d,  $J = 7.0$  Hz, 6H), 1.05 (t,  $J = 7.1$  Hz, 3H);  $^{13}\text{C}$  NMR (101 MHz,  $\text{CDCl}_3$ )  $\delta$  165.2, 164.3, 146.9, 133.5, 130.0, 127.6, 126.7, 121.1, 111.7, 59.7, 27.3, 21.0, 13.8, 11.8. HRMS calc. for  $\text{C}_{17}\text{H}_{20}\text{O}_3$   $[\text{M}+\text{Na}]^+$ : 295.1310, found: 295.1312.

**Methyl 5-methyl-2,4-diphenylfuran-3-carboxylate(3ap).** White solid was obtained in 91% yield

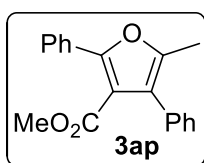

after purification with column chromatography on silica gel (petroleum ether/ethyl acetate, 100/1). M.p.: 94–96 °C.  $^1\text{H}$  NMR (400 MHz,  $\text{CDCl}_3$ )  $\delta$  7.73–7.71 (m, 2H), 7.36–7.29 (m, 5H), 7.27–7.21 (m, 3H), 3.52 (s, 3H), 2.25 (s, 3H);  $^{13}\text{C}$  NMR (101 MHz,  $\text{CDCl}_3$ )  $\delta$  165.2, 154.1, 148.6, 132.8, 130.1, 129.5, 128.8, 128.3, 128.1, 127.6, 127.1, 122.9, 114.5, 51.5, 12.1. HRMS calc. for  $\text{C}_{19}\text{H}_{16}\text{O}_3$   $[\text{M}+\text{H}]^+$ : 293.1178, found: 293.1176.

**Ethyl 5-methyl-2-phenyl-4-(p-tolyl)furan-3-carboxylate (3ba).** Pale yellow solid was obtained in

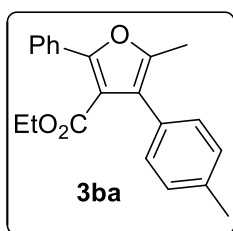

55% yield after purification with column chromatography on silica gel (petroleum ether/ethyl acetate, 100/1). M.p.: 66–68 °C.  $^1\text{H}$  NMR (400 MHz,  $\text{CDCl}_3$ )  $\delta$  7.82–7.79 (m, 2H), 7.43–7.32 (m, 3H), 7.23–7.18 (m, 4H), 4.11 (q,  $J = 7.1$  Hz, 2H), 2.38 (s, 3H), 2.31 (s, 3H), 1.02 (t,  $J = 7.1$  Hz, 3H);  $^{13}\text{C}$  NMR (101 MHz,  $\text{CDCl}_3$ )  $\delta$  164.8, 153.8, 148.4, 136.6, 130.2, 129.9, 129.5, 128.7, 128.7, 128.2, 127.6, 122.9, 114.9, 60.5, 21.3, 13.7, 12.1. HRMS calc. for  $\text{C}_{21}\text{H}_{20}\text{O}_3$   $[\text{M}+\text{Na}]^+$ : 343.1310, found: 343.1305.

**Ethyl 4-(4-methoxyphenyl)-5-methyl-2-phenylfuran-3-carboxylate (3ca).** Pale yellow oil was

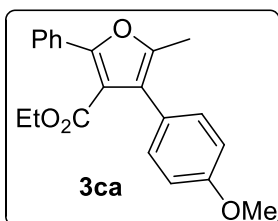

obtained in 72% yield after purification with column chromatography on silica gel (petroleum ether/ethyl acetate, 100/1).  $^1\text{H}$  NMR (400 MHz,  $\text{CDCl}_3$ )  $\delta$  7.82–7.80 (m, 2H), 7.42–7.32 (m, 3H), 7.25–7.21 (m, 2H), 6.95–6.91 (m, 2H), 4.11 (q,  $J = 7.1$  Hz, 2H), 3.82 (s, 3H), 2.30 (s, 3H), 1.03 (t,  $J = 7.1$  Hz,

3H);  $^{13}\text{C}$  NMR (101 MHz,  $\text{CDCl}_3$ )  $\delta$  164.8, 158.7, 153.8, 148.4, 130.8, 130.2, 128.7, 128.2, 127.6, 125.2, 122.5, 114.9, 113.5, 60.5, 55.3, 13.8, 12.1. HRMS calc. for  $\text{C}_{21}\text{H}_{20}\text{O}_4$   $[\text{M}+\text{Na}]^+$ : 359.1259, found: 329.1251.

**Ethyl 4-(4-hydroxyphenyl)-5-methyl-2-phenylfuran-3-carboxylate (3da).** White solid was

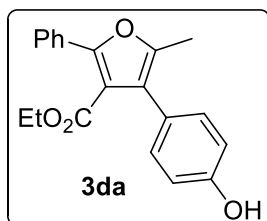

obtained in 59% yield after purification with column chromatography on silica gel (petroleum ether/ethyl acetate, 5/1). M.p.: 115–117 °C.  $^1\text{H}$  NMR (400 MHz,  $\text{CDCl}_3$ )  $\delta$  7.79–7.76 (m, 2H), 7.43–7.33 (m, 3H), 7.15–7.13 (m, 2H), 6.80–6.78 (m, 2H), 5.84 (s, 1H), 4.14 (q,  $J$  = 7.1 Hz, 2H), 2.30 (s, 3H), 1.05

(t,  $J$  = 7.1 Hz, 3H);  $^{13}\text{C}$  NMR (101 MHz,  $\text{CDCl}_3$ )  $\delta$  165.3, 155.0, 154.1, 148.5, 130.8, 130.2, 129.0, 128.8, 128.2, 127.7, 124.8, 122.6, 115.1, 60.8, 13.7, 12.0. HRMS calc. for  $\text{C}_{20}\text{H}_{18}\text{O}_4$   $[\text{M}+\text{H}]^+$ : 323.1283, found: 323.1279.

**Ethyl 5-methyl-2-phenyl-4-(4-(trifluoromethyl)phenyl)furan-3-carboxylate (3fa).** Pale yellow oil

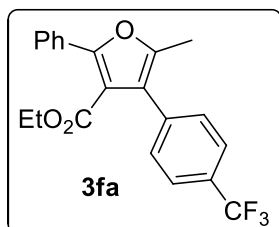

was obtained in 53% yield after purification with column chromatography on silica gel (petroleum ether/ethyl acetate, 100/1).  $^1\text{H}$  NMR (400 MHz,  $\text{CDCl}_3$ )  $\delta$  7.85–7.82 (m, 2H), 7.66–7.64 (m, 2H),  $\delta$  7.45–7.36 (m, 5H), 4.09 (q,  $J$  = 7.1 Hz, 2H), 2.32 (s, 3H), 0.98 (t,  $J$  = 7.1 Hz, 3H);  $^{13}\text{C}$  NMR (101 MHz,  $\text{CDCl}_3$ )

$\delta$  164.1, 154.9, 148.9, 137.0, 130.0, 129.8, 129.1, 128.2, 127.9, 124.9 (q,  $J$  = 3.7 Hz), 121.9, 114.3, 100.0, 60.6, 13.6, 12.1.  $^{13}\text{C}$  NMR (101 MHz,  $\text{CDCl}_3$ )  $\delta$  164.1, 154.9, 149.0, 137.0, 130.0, 129.8, 129.2 (d,  $J$  = 32.4 Hz), 129.1, 128.2, 127.9, 124.90 (q,  $J$  = 3.8 Hz), 124.3 (d,  $J$  = 272.0 Hz), 121.9, 114.3, 60.6, 13.6, 12.0. HRMS calc. for  $\text{C}_{21}\text{H}_{17}\text{F}_3\text{O}_3$   $[\text{M}+\text{Na}]^+$ : 397.1027, found: 397.1029.

**Ethyl 4-(4-fluorophenyl)-5-methyl-2-phenylfuran-3-carboxylate (3ga).** Pale yellow solid was

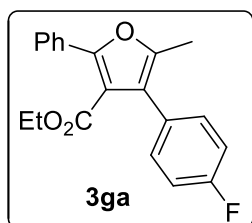

obtained in 96% yield after purification with column chromatography on silica gel (petroleum ether/ethyl acetate, 100/1). M.p.: 64–66 °C.  $^1\text{H}$  NMR (400 MHz,  $\text{CDCl}_3$ )  $\delta$  7.83–7.81 (m, 2H), 7.44–7.36 (m, 3H), 7.29–7.24 (m, 3H), 7.10–7.06 (m, 2H), 4.10 (q,  $J$  = 7.2 Hz, 2H), 2.29 (s, 3H), 1.01 (t,  $J$  = 7.1 Hz, 3H);  $^{13}\text{C}$

NMR (101 MHz,  $\text{CDCl}_3$ )  $\delta$  164.4, 162.0 (d,  $J$  = 246.0 Hz), 154.4, 148.6, 131.3 (d,  $J$  = 8.0 Hz), 130.0, 129.0 (d,  $J$  = 3.4 Hz), 129.0, 128.2, 127.8, 122.0, 114.9 (d,  $J$  = 21.4 Hz), 114.6, 60.5, 13.7, 12.0. HRMS calc. for  $\text{C}_{20}\text{H}_{17}\text{FO}_3$   $[\text{M}+\text{Na}]^+$ : 347.1059, found: 347.1060.

**Ethyl 4-(2-fluorophenyl)-5-methyl-2-phenylfuran-3-carboxylate (3ha).** Pale yellow oil was

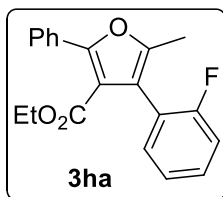

obtained in 86% yield after purification with column chromatography on silica gel (petroleum ether/ethyl acetate, 100/1).  $^1\text{H}$  NMR (400 MHz,  $\text{CDCl}_3$ )  $\delta$  7.89–7.87 (m, 2H), 7.44–7.35 (m, 3H), 7.34–7.24 (m, 3H), 7.19–7.09 (m, 2H), 4.08 (q,  $J = 7.1$  Hz, 2H), 2.29 (s, 3H), 0.97 (t,  $J = 7.2$  Hz, 3H);  $^{13}\text{C}$  NMR (101 MHz,  $\text{CDCl}_3$ )

$\delta$  164.0, 160.4 (d,  $J = 246.4$  Hz), 155.1, 149.3, 131.7 (d,  $J = 3.3$  Hz), 130.0, 129.2 (d,  $J = 8.1$  Hz), 129.0, 128.1, 128.1, 123.7 (d,  $J = 3.6$  Hz), 121.1 (d,  $J = 15.8$  Hz), 116.8, 115.3 (d,  $J = 22.1$  Hz), 114.8, 60.4, 13.6, 12.1. HRMS calc. for  $\text{C}_{20}\text{H}_{17}\text{FO}_3$   $[\text{M}+\text{Na}]^+$ : 347.1059, found: 347.1058.

**Ethyl 4-(3-fluorophenyl)-5-methyl-2-phenylfuran-3-carboxylate (3ia).** Pale yellow oil was

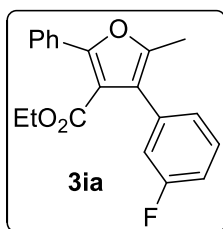

obtained in 94% yield after purification with column chromatography on silica gel (petroleum ether/ethyl acetate, 100/1).  $^1\text{H}$  NMR (400 MHz,  $\text{CDCl}_3$ )  $\delta$  7.85–7.82 (m, 2H), 7.44–7.32 (m, 4H), 7.09–7.00 (m, 3H), 4.11 (q,  $J = 7.1$  Hz, 2H), 2.32 (s, 3H), 1.01 (t,  $J = 7.1$  Hz, 3H);  $^{13}\text{C}$  NMR (101 MHz,  $\text{CDCl}_3$ )  $\delta$  164.3, 162.5

(d,  $J = 245.2$  Hz), 154.4, 148.7, 135.3 (d,  $J = 8.4$  Hz), 129.9, 129.4 (d,  $J = 8.5$  Hz), 129.0, 128.2, 127.7, 125.4 (d,  $J = 2.8$  Hz), 122.0, 116.7 (d,  $J = 21.7$  Hz), 114.5, 113.9 (d,  $J = 21.0$  Hz), 60.6, 13.6, 12.1. HRMS calc. for  $\text{C}_{20}\text{H}_{17}\text{FO}_3$   $[\text{M}+\text{Na}]^+$ : 347.1059, found: 347.1055.

**Ethyl 5-methyl-2-phenyl-4-(thiophen-2-yl)furan-3-carboxylate (3ja).** Pale yellow oil was obtained

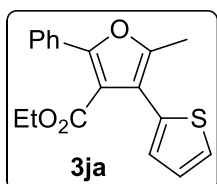

in 40% yield after purification with column chromatography on silica gel (petroleum ether/ethyl acetate, 100/1).  $^1\text{H}$  NMR (400 MHz,  $\text{CDCl}_3$ )  $\delta$  7.80–7.78 (m, 2H), 7.43–7.33 (m, 4H), 7.08–7.02 (m, 2H), 4.16 (q,  $J = 7.1$  Hz, 2H), 2.39 (s, 3H), 1.09 (t,  $J = 7.1$  Hz, 3H);  $^{13}\text{C}$  NMR (101 MHz,  $\text{CDCl}_3$ )  $\delta$  164.4, 153.9, 149.9,

133.3, 129.9, 128.9, 128.2, 127.5, 127.4, 126.8, 125.5, 115.9, 115.1, 60.8, 13.7, 12.4. HRMS calc. for  $\text{C}_{18}\text{H}_{16}\text{O}_3\text{S}$   $[\text{M}+\text{H}]^+$ : 313.0898, found: 313.0896.

**Ethyl 5-methyl-4-phenethyl-2-phenylfuran-3-carboxylate (3ka).** Colorless oil was obtained in 60%

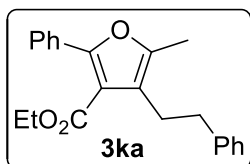

yield after purification with column chromatography on silica gel (petroleum ether/ethyl acetate, 100/1).  $^1\text{H}$  NMR (400 MHz,  $\text{CDCl}_3$ )  $\delta$  7.76–7.74 (m, 2H), 7.42–7.33 (m, 3H), 7.29–7.25 (m, 2H), 7.21–7.15 (m, 3H), 4.30 (q,  $J = 7.1$  Hz,

2H), 2.85 (m, 4H), 1.99 (s, 3H), 1.30 (t,  $J = 7.2$  Hz, 3H);  $^{13}\text{C}$  NMR (101 MHz,  $\text{CDCl}_3$ )  $\delta$  164.6, 155.3, 148.5, 141.9, 130.6, 128.7, 128.7, 128.3, 128.3, 127.9, 125.9, 119.9, 113.9, 60.3, 36.8, 26.8, 14.2, 11.0.

HRMS calc. for  $\text{C}_{22}\text{H}_{22}\text{O}_3$   $[\text{M}+\text{H}]^+$ : 335.1647, found: 335.1628.



### Preparation of Cu-acetylide **6**<sup>4</sup> and Ag-acetylide **7**<sup>5</sup>

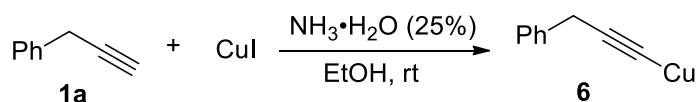

To a solution of copper iodide (3.81 g, 20.0 mmol) in a mixture of ammonium hydroxide (25%  $\text{NH}_3$  solution, 55 mL) and ethanol (30 mL) was added prop-2-yn-1-ylbenzene **1a** (1.16g, 10.0 mmol) dropwise. The deep blue reaction mixture was stirred overnight at room temperature under nitrogen and the yellow precipitate was collected by filtration and successively washed with ammonium hydroxide (25%  $\text{NH}_3$  solution, 3x50 mL), water (3x50 mL), ethanol (3x50 mL), and diethyl ether (3x50 mL). The bright yellow solid was then dried under high vacuum overnight to afford 1.01g (3-phenylprop-1-yn-1-yl)copper **6**<sup>4</sup> in 57% yield which was used without further purification.

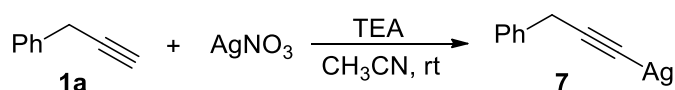

Silver nitrate (1.70 g, 10 mmol) was dissolved in acetonitrile (50 mL). Then prop-2-yn-1-ylbenzene **1a** (1.16 g, 10 mmol) and triethylamine (1.4 mL, 10 mmol) were added successively with vigorous stirring and the mixture was stirred overnight under a nitrogen atmosphere in darkness. The white precipitate formed was collected by filtration, washed thoroughly with acetonitrile ( $2 \times 10$  mL). The white solid was then dried in darkness under high vacuum to afford 1.78g (3-phenylprop-1-yn-1-yl)silver **7**<sup>5</sup> in 80% yield which was used immediately without further purification.

### Experimental procedure for control experiments eq.3 and eq.4

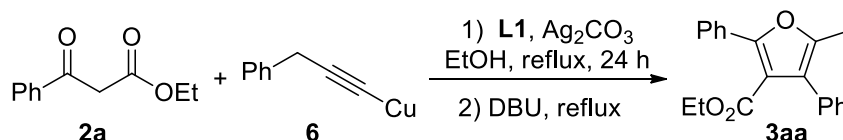

Ethyl 3-oxo-3-phenylpropanoate **2a** (38.4 mg, 0.2 mmol), (3-phenylprop-1-yn-1-yl)copper **6** (78.6 mg, 0.44 mmol), 1,10-phenanthroline hydrate **L1** (95.1 mg, 0.48 mmol), and  $\text{Ag}_2\text{CO}_3$  (66.2 mg, 0.24 mmol) were added to 3 mL anhydrous ethanol in an oven-dried Schlenk flask under a nitrogen atmosphere, the reaction stirred at 80 °C for 24 h. Then the reaction mixture was cooled to room temperature, DBU (36.5 mg, 0.24 mmol) was added directly to the resulting reaction mixture without further purification and continued stirring at 80 °C being monitored by TLC. The reaction mixture was then filtered, washed with dichloromethane (10 mL) and concentrated under vacuum. The residue was purified by silica gel chromatography (petroleum ether/ethyl acetate, 100/1) to afford pale yellow oil **3aa** in 89% yield.

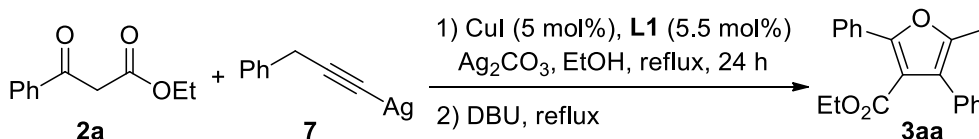

A solution of CuI (1.9 mg, 0.01 mmol) and 1,10-phenanthroline hydrate **L1** (2.2 mg, 0.011 mmol) in 1 mL of anhydrous ethanol placed in an oven-dried Schlenk flask was stirred at room temperature under a nitrogen atmosphere for 1 h. A solution of ethyl 3-oxo-3-phenylpropanoate **2a** (38.4 mg, 0.2 mmol), (3-phenylprop-1-yn-1-yl)silver **7** (98.1 mg, 0.44 mmol) and *i*Pr<sub>2</sub>NEt (42  $\mu$ L, 0.24 mmol) in 2 mL of anhydrous ethanol was added. The reaction mixture was allowed to stir for 24 h at 80 °C. Then the reaction mixture was cooled to room temperature, DBU (36.5 mg, 0.24 mmol) was added directly to the resulting reaction mixture without further purification and continued stirring at 80 °C being monitored by TLC. The reaction mixture was then filtered, washed with dichloromethane (10 mL) and concentrated under vacuum. The residue was purified by silica gel chromatography (petroleum ether/ethyl acetate, 100/1) to afford pale yellow oil **3aa** in 31% yield.

### Transformation of cycloadduct via catalytic decarboxylative coupling

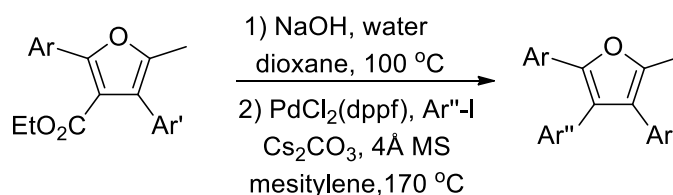

Transformation of cycloadduct proceeded according to the literature<sup>6</sup>. Cycloadduct **3** (0.25 mmol, 1 equiv) in 0.5 M aq. NaOH (2 equiv, 4 mL/mmol) and dioxane was stirred at 100 °C for 12 h. At this time, the mixture was acidified by concd aq HCl and extracted with EtOAc to afford the carboxylic acid without further purification. PdCl<sub>2</sub>(dppf) (10 mol %), carboxylic acid **3'** (0.25 mmol, 1 equiv), iodide (2 equiv), Cs<sub>2</sub>CO<sub>3</sub> (3 equiv), 4Å MS (300 mg/mmol) and 4 mL mesitylene were added to an oven-dried Schlenk flask equipped with a stir bar under nitrogen atmosphere. The reaction mixture was stirred at 170 °C for 12 h. After the reaction was complete, the flask were filtered through the plug of silica gel, and then concentrated by rotary evaporation. The residue was purified by flash chromatography, eluting with hexane/EtOAc to afford the product **9**.

**2-Methyl-3,4,5-triphenylfuran (9a).** White solid was obtained in 84% yield after purification with

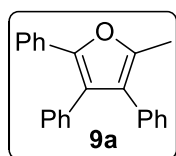

column chromatography on silica gel (petroleum ether/ethyl acetate, 100/1). M.p.: 130–132 °C. <sup>1</sup>H NMR (400 MHz, CDCl<sub>3</sub>)  $\delta$  7.44–7.41 (m, 2H), 7.24–7.18 (m, 8H), 7.17–7.12 (m, 3H), 7.06–7.03 (m, 2H), 2.42 (s, 3H); <sup>13</sup>C NMR (101 MHz, CDCl<sub>3</sub>)  $\delta$

147.9, 146.9, 133.8, 133.1, 131.3, 130.4, 129.8, 128.5, 128.3, 128.1, 127.1, 127.0, 126.46, 125.7, 123.9, 123.0, 12.6. HRMS calc. for  $C_{23}H_{18}O$   $[M+H]^+$ : 311.1436, found: 311.1433.

**2-(4-Methoxyphenyl)-5-methyl-3,4-diphenylfuran (9b).** White solid was obtained in 86% yield

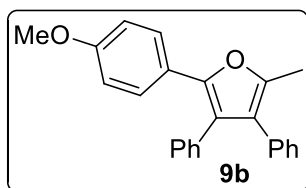

after purification with column chromatography on silica gel (petroleum ether/ethyl acetate, 20/1). M.p.: 128–130 °C.  $^1H$  NMR (400 MHz,  $CDCl_3$ )  $\delta$  7.37–7.34 (m, 2H), 7.25–7.13 (m, 8H), 7.06–7.04 (m, 2H), 6.78–6.76 (m, 2H), 3.76 (s, 3H), 2.42 (s, 3H);  $^{13}C$  NMR (101 MHz,  $CDCl_3$ )  $\delta$  158.6, 147.2,

147.0, 133.9, 133.2, 130.4, 129.7, 128.4, 128.0, 127.2, 126.8, 126.3, 124.1, 123.6, 121.4, 113.8, 55.2, 12.6. HRMS calc. for  $C_{24}H_{20}O_2$   $[M+H]^+$ : 341.1542, found: 341.1544.

**2-(4-Fluorophenyl)-5-methyl-3,4-diphenylfuran (9c).** White solid was obtained in 87% yield after

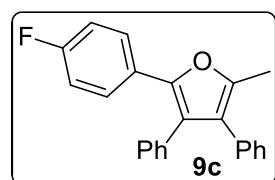

purification with column chromatography on silica gel (petroleum ether/ethyl acetate, 100/1). M.p.: 144–146 °C.  $^1H$  NMR (400 MHz,  $CDCl_3$ )  $\delta$  7.42–7.36 (m, 2H), 7.27–7.18 (m, 6H), 7.17–7.12 (m, 2H), 7.06–7.03 (m, 2H), 6.94–6.89 (m, 2H), 2.42 (s, 1H);  $^{13}C$  NMR (101 MHz,  $CDCl_3$ )  $\delta$  161.78 (d,  $J = 246.9$  Hz),

147.80, 146.10, 133.53, 132.94, 130.33, 129.71, 128.65, 128.52, 128.06, 127.41 (d,  $J = 7.9$  Hz), 127.12, 126.45, 123.82, 122.59, 115.28 (d,  $J = 21.7$  Hz), 12.56. HRMS calc. for  $C_{23}H_{17}FO$   $[M+H]^+$ : 329.1342, found: 329.1336.

**2-Methyl-3,5-diphenyl-4-(p-tolyl)furan (9d).** White solid was obtained in 83% yield after

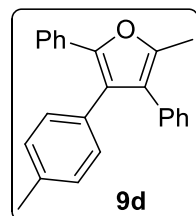

purification with column chromatography on silica gel (petroleum ether/ethyl acetate, 100/1). M.p.: 104–106 °C.  $^1H$  NMR (400 MHz,  $CDCl_3$ )  $\delta$  7.45–7.41 (m, 2H), 7.25–7.12 (m, 8H), 7.07–7.04 (m, 6H), 2.41 (s, 3H), 2.31 (s, 3H);  $^{13}C$  NMR (101 MHz,  $CDCl_3$ )  $\delta$  147.8, 146.8, 136.6, 133.2, 131.4, 130.6, 130.2, 129.8, 129.2, 128.3,

128.0, 126.8, 126.4, 125.6, 123.9, 122.9, 21.4, 12.6. HRMS calc. for  $C_{24}H_{20}O$   $[M+H]^+$ : 325.1592, found: 325.1590.

**3-(4-Fluorophenyl)-2-methyl-4,5-diphenylfuran (9e).** White solid was obtained in 85% yield after

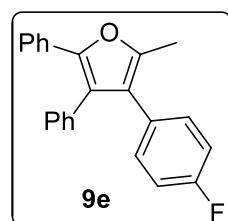

purification with column chromatography on silica gel (petroleum ether/ethyl acetate, 100/1). M.p.: 138–140 °C.  $^1H$  NMR (400 MHz,  $CDCl_3$ )  $\delta$  7.43–7.41 (m, 2H), 7.27–7.12 (m, 8H), 7.02–6.98 (m, 2H), 6.95–6.90 (m, 2H), 2.41 (s, 3H);  $^{13}C$  NMR (101 MHz,  $CDCl_3$ )  $\delta$  161.6 (d,  $J = 245.5$  Hz), 147.8, 146.9, 133.6, 131.2 (d,

$J = 7.9$  Hz), 131.1, 130.3, 129.0 (d,  $J = 3.3$  Hz), 128.5, 128.3, 127.1, 127.0, 125.6, 123.0, 122.8, 115.0 (d,  $J = 21.3$  Hz), 12.5. HRMS calc. for  $C_{23}H_{17}FO$   $[M+H]^+$ : 329.1342, found: 329.1346.

## References

1. (a) M. C. Davis, A. J. Guenthner, C. M. Sahagun, K. R. Lamison, J. T. Reams and J. M. Mabry, *Polymer*, 2013, **54**, 6902; (b) J. Louvel, J. F. S. Carvalho, Z.-Y. Yu, M. Soethoudt, E. B. Lenselink, E. Klaasse, J. Brussee and A. P. IJzerman, *J. Med. Chem.*, 2013, **56**, 9427.
2. Y. Jiang, X. Chen, Y. Zheng, Z. Xue, C. Shu, W. Yuan and X. Zhang, *Angew. Chem. Int. Ed.*, 2011, **50**, 7304.
3. M. H. Suhre, M. Reif and S. F. Kirsch, *Org. Lett.*, 2005, **7**, 3925.
4. K. Jouvin, J. Heimbürger and G. Evano, *Chem. Sci.*, 2012, **3**, 756.
5. B. Li, S.-Q. Zang, H.-Y. Li, Y.-J. Wu and T.C.W. Mak, *J. Organomet. Chem.*, 2012, **708–709**, 112.
6. S. Ishikawa, Y. Noda, M. Wada and T. Nishikata, *J. Org. Chem.*, 2015, **80**, 7555.

7.85  
7.85  
7.84  
7.83  
7.83  
7.82  
7.43  
7.43  
7.42  
7.41  
7.41  
7.40  
7.39  
7.38  
7.38  
7.37  
7.37  
7.36  
7.35  
7.33  
7.33  
7.32  
7.31  
7.31  
7.30  
7.29  
4.11  
4.10  
4.08  
4.06  
-2.32  
0.99  
0.97  
0.96

LZT-1944.10.fid  
PROTON CDC13 {D:\NMR400\02T2} nmr 28

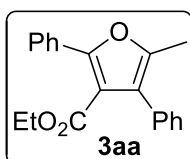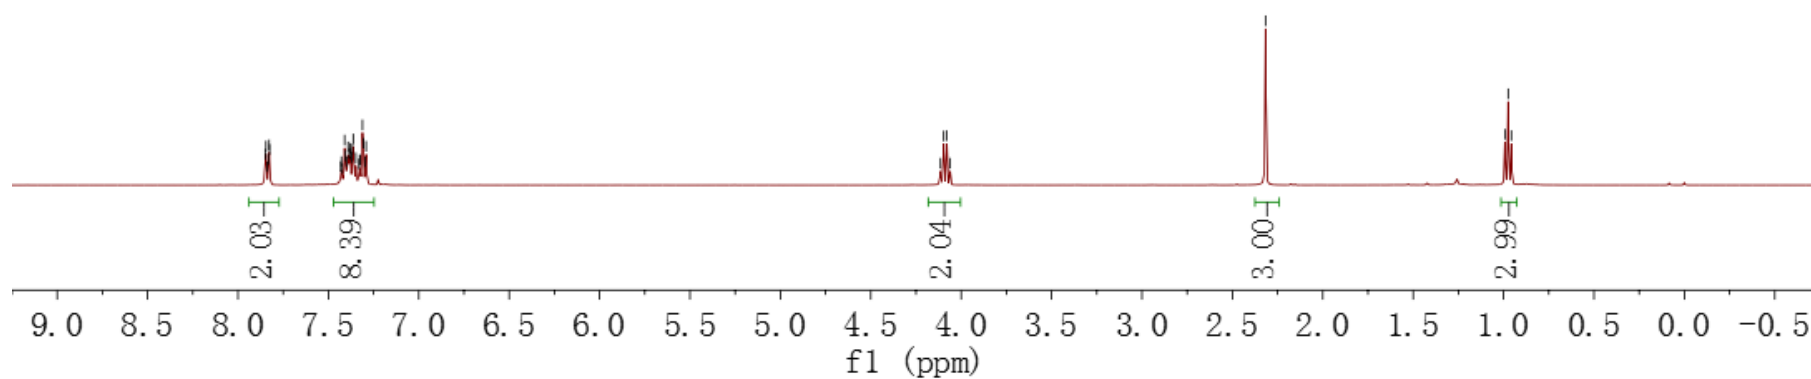

S13

-164.69  
 -154.02  
 -148.47  
 133.03  
 130.12  
 129.61  
 128.78  
 128.21  
 128.00  
 127.62  
 127.03  
 122.99  
 114.85  
 -60.53  
 13.66  
 12.10

LZT-1944.11.fid

C13CPD CDC13 {D:\NMR400\02T2} nmr 28

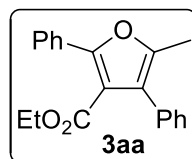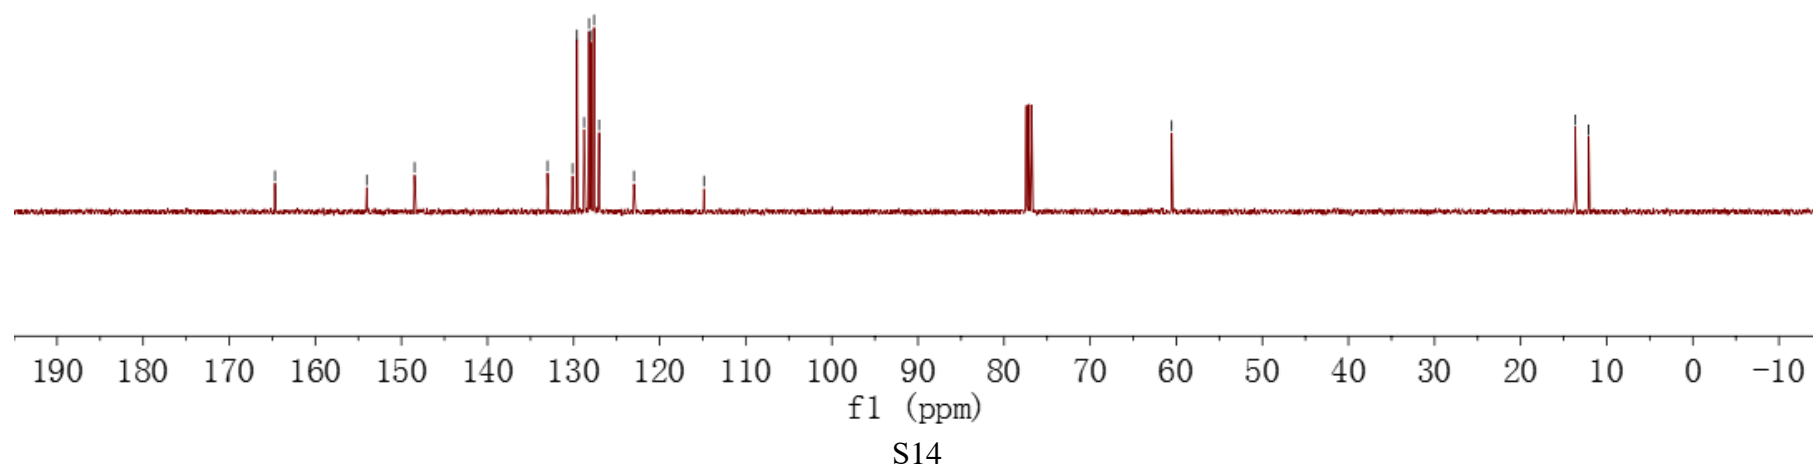

7.55  
7.55  
7.54  
7.53  
7.53  
7.48  
7.47  
7.46  
7.46  
7.46  
7.42  
7.42  
7.41  
7.40  
7.40  
7.40  
7.39  
7.38  
7.38  
7.37  
7.37  
7.36  
7.36  
7.35  
7.35  
7.35  
7.34  
7.34  
7.33  
7.33  
7.32  
7.31  
7.31  
4.05  
4.03  
4.01  
3.99  
2.32  
0.94  
0.92  
0.90

LZT-2042

PROTON CDC13 {D:\NMR400\02T2} nmr 26

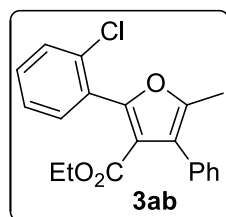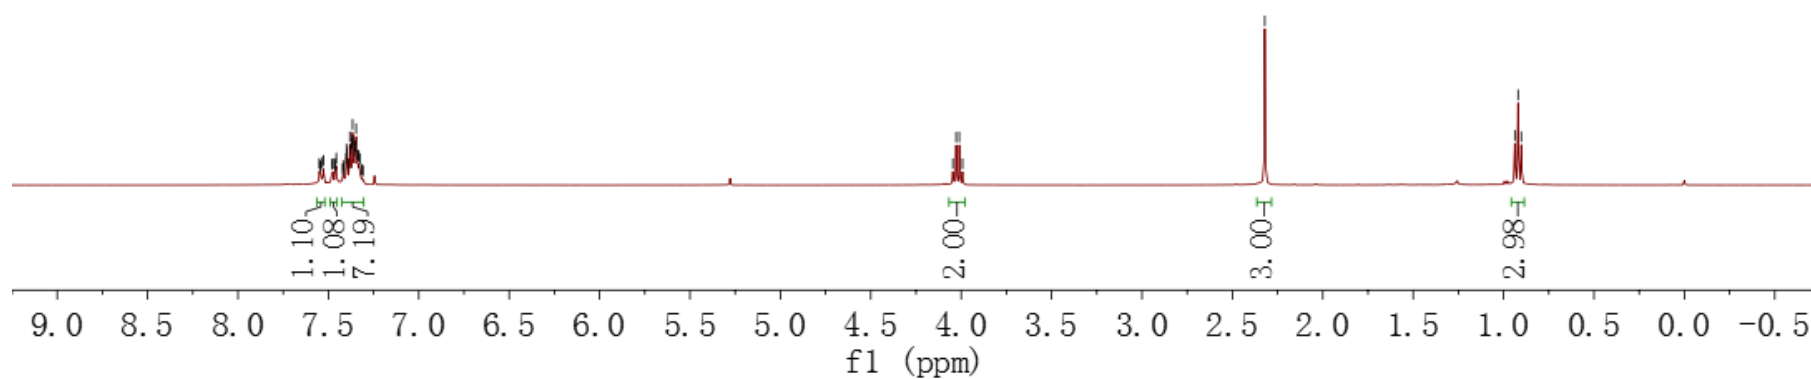

S15

LZT-2042

C13CPD CDC13 {D:\NMR400\02T2} nmr 26

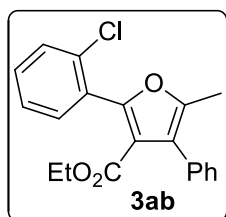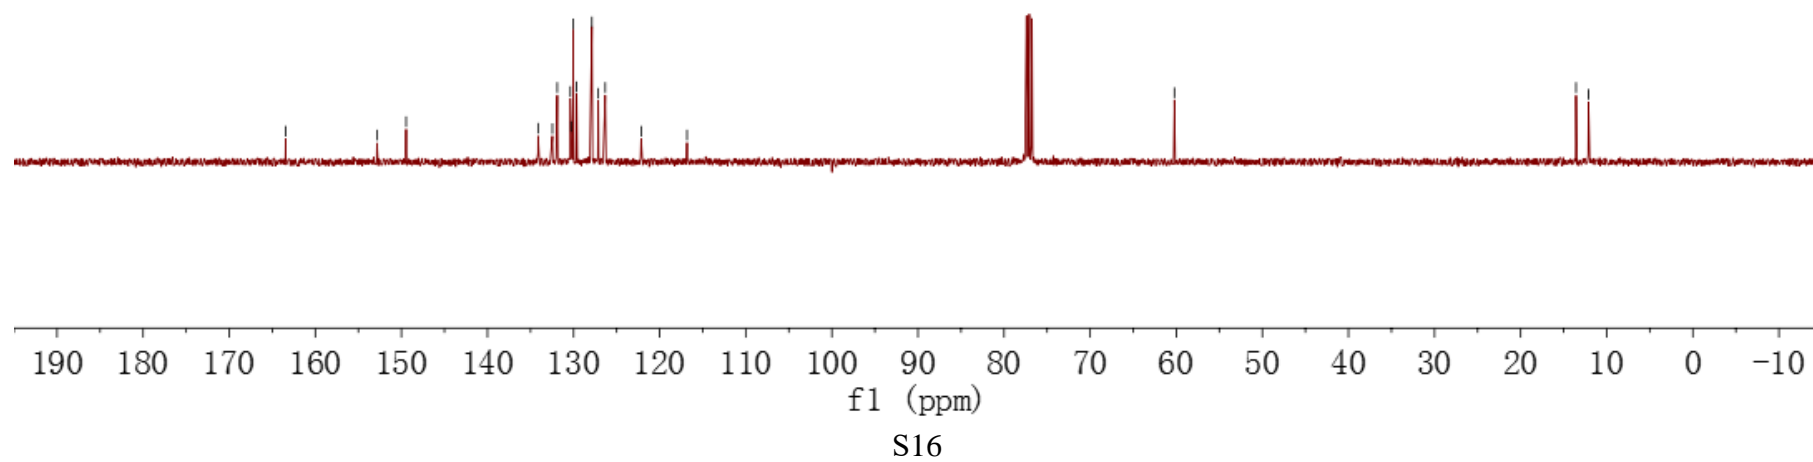



7.87  
7.86  
7.86  
7.86  
7.85  
7.77  
7.76  
7.76  
7.76  
7.75  
7.75  
7.74  
7.74  
7.41  
7.41  
7.40  
7.39  
7.39  
7.38  
7.38  
7.37  
7.37  
7.37  
7.36  
7.36  
7.36  
7.34  
7.34  
7.33  
7.33  
7.33  
7.32  
7.32  
7.31  
7.31  
7.31  
7.30  
7.30  
7.29  
7.28  
7.28  
7.28  
7.24  
4.13  
4.11  
4.10  
4.08  
2.32  
1.02  
1.00  
0.98

LZT-2053

PROTON CDC13 {D:\NMR400\02T2} nmr 48

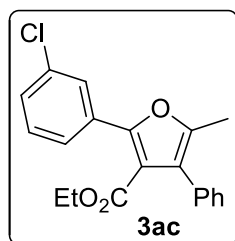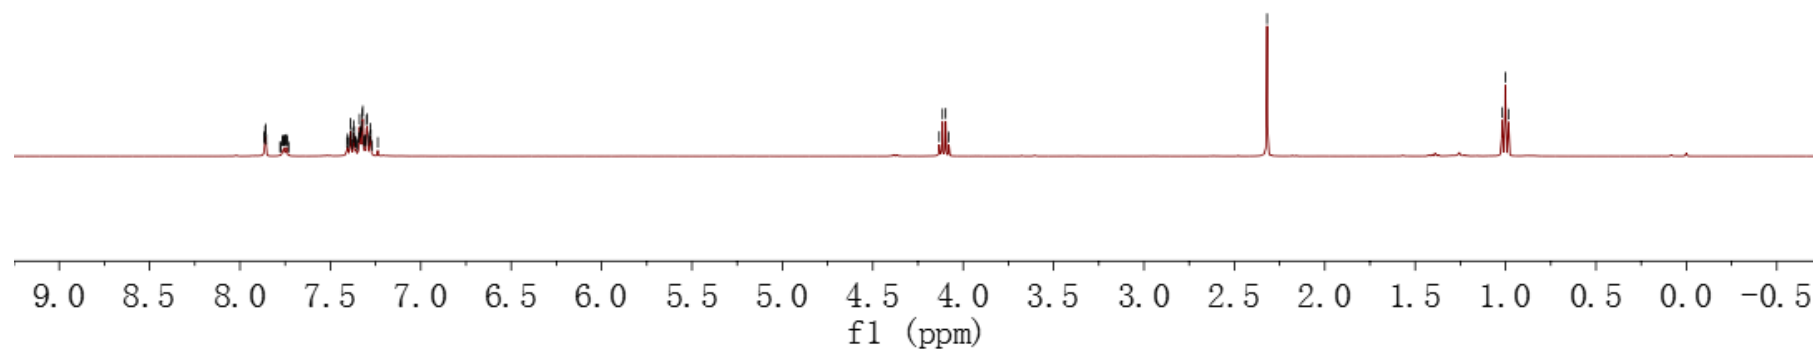

S17

-164.36  
 -152.22  
 -149.05  
 134.17  
 132.74  
 131.74  
 129.60  
 129.49  
 128.68  
 128.06  
 127.53  
 127.18  
 125.65  
 123.28  
 115.72

LZT-2053

C13CPD CDC13 {D:\NMR400\02T2} nmr 48

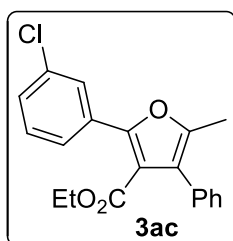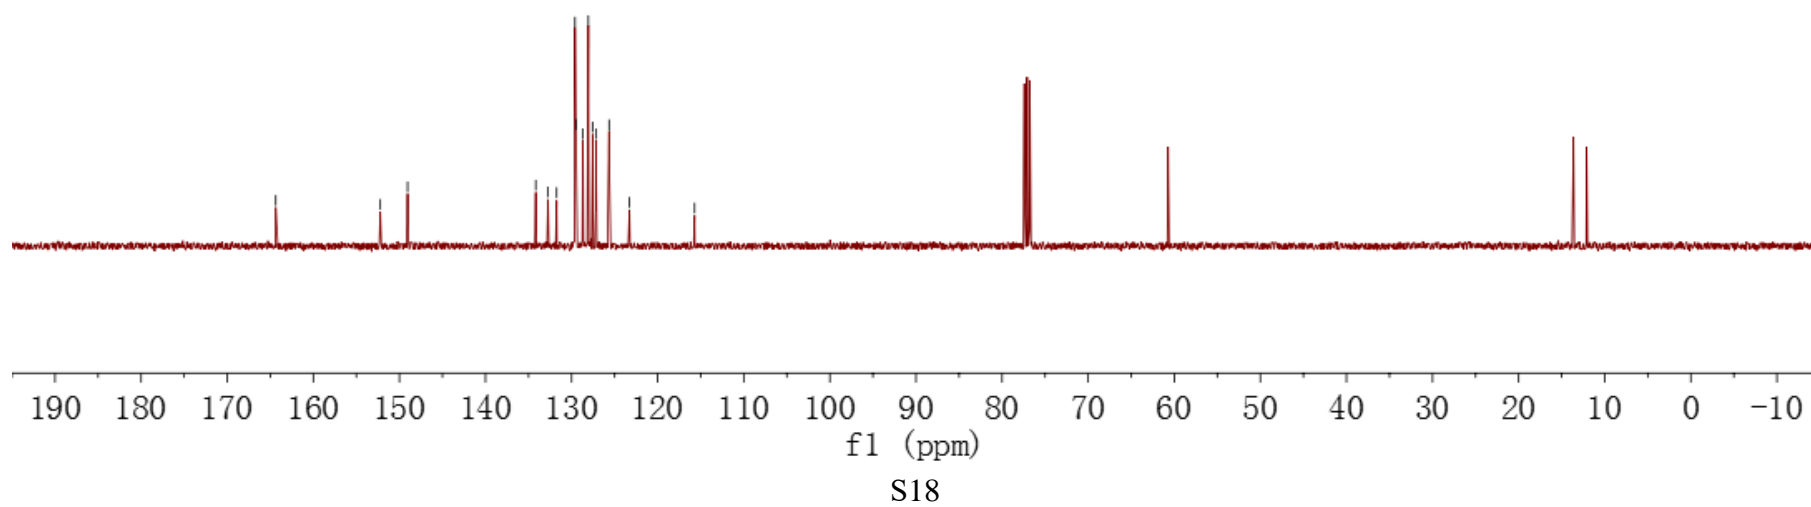

7.82 7.82 7.81 7.80 7.41 7.40 7.40 7.39 7.39 7.39 7.38 7.38 7.37 7.37 7.36 7.36 7.34 7.34 7.33 7.32 7.32 7.31 7.30 7.30 7.30 7.29 7.29 7.28 7.27 7.27 7.24 4.11 4.09 4.07 4.05 2.31 0.98 0.97 0.95

LZT-2039

PROTON CDC13 {D:\NMR400\02T2} nmr 47

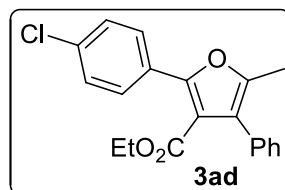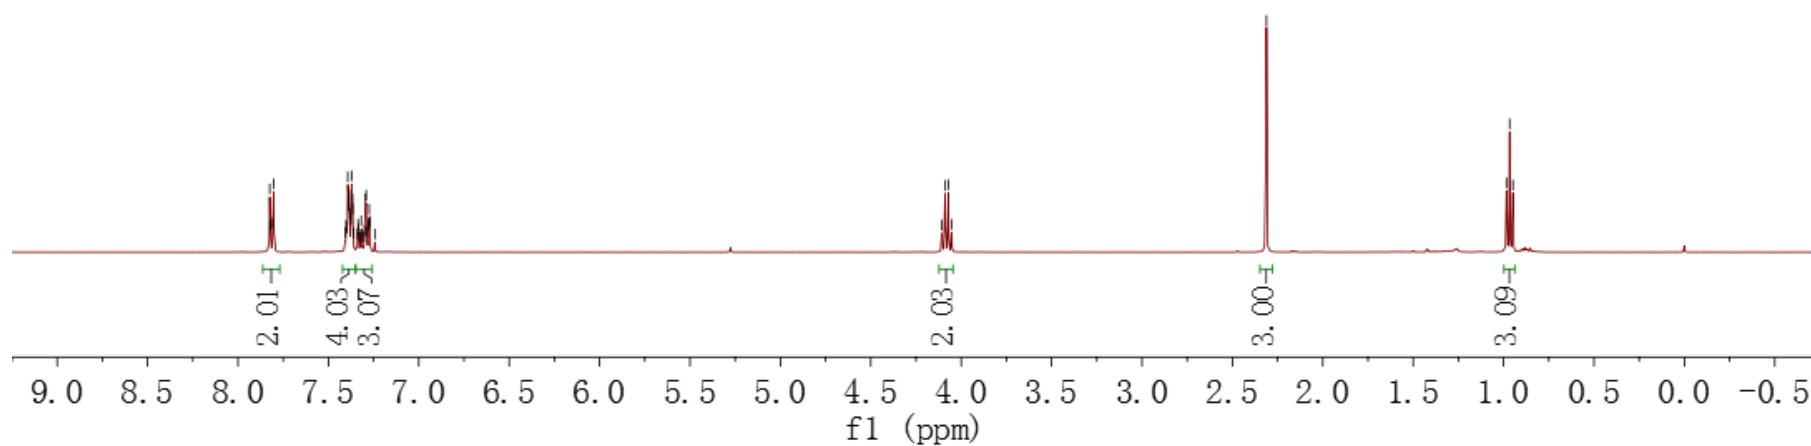

S19

LZT-2039

C13CPD CDC13 {D:\NMR400\02T2} nmr 47

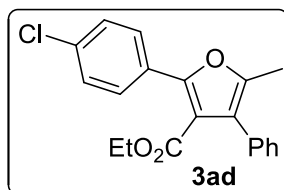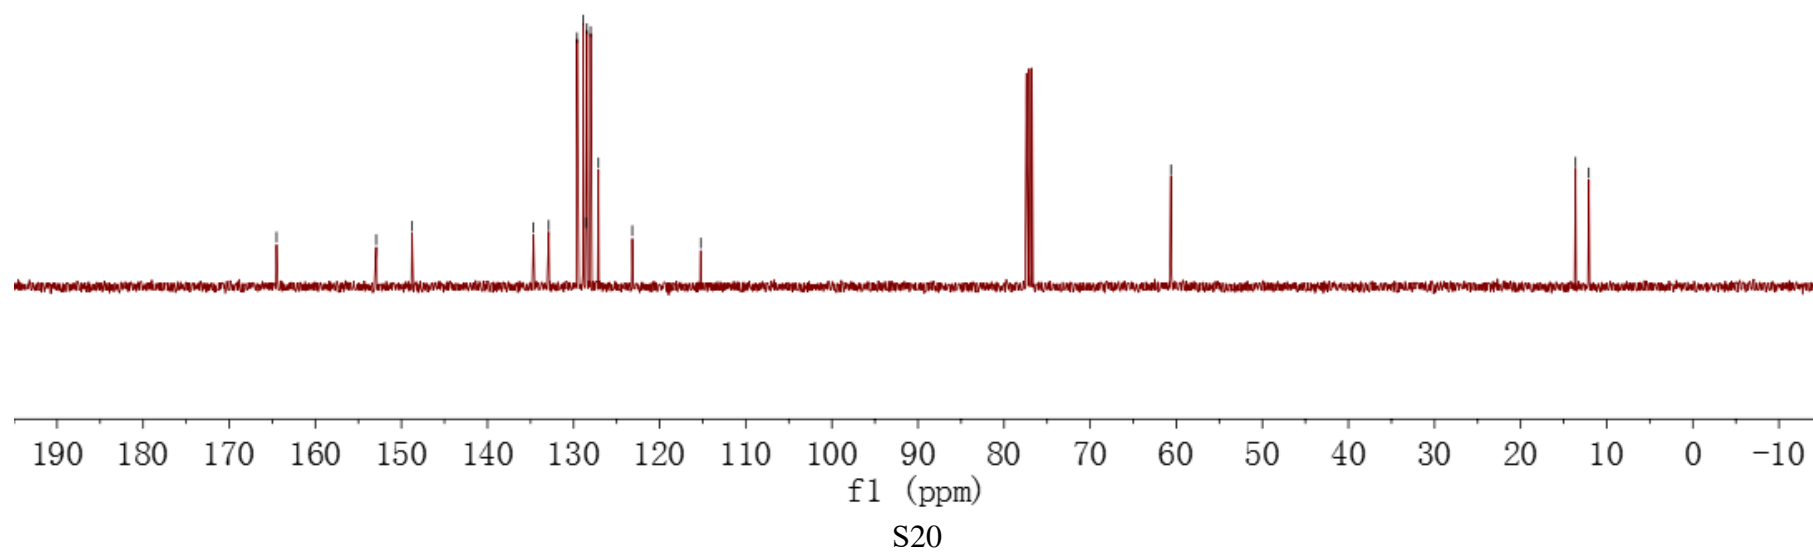

7.88  
7.87  
7.86  
7.86  
7.86  
7.85  
7.85  
7.84  
7.41  
7.40  
7.40  
7.39  
7.38  
7.38  
7.37  
7.37  
7.36  
7.36  
7.34  
7.33  
7.33  
7.32  
7.31  
7.30  
7.30  
7.29  
7.28  
7.28  
7.28  
7.13  
7.12  
7.11  
7.10  
7.10  
7.09  
7.08  
4.10  
4.08  
4.06  
4.05  
2.31  
0.98  
0.96  
0.94

LZT-2038

PROTON CDC13 {D:\NMR400\02T2} nmr 45

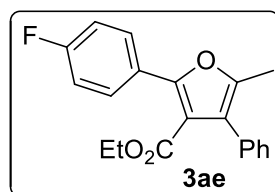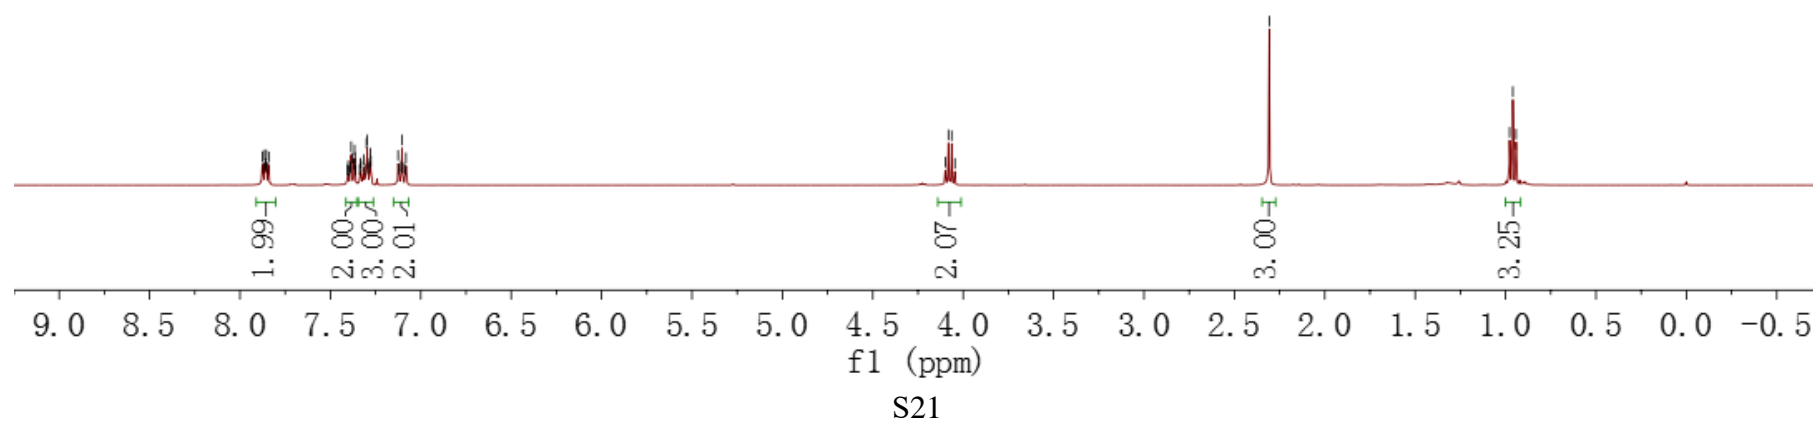

164.53  
164.22  
161.74  
-153.46  
-148.48  
133.02  
129.82  
129.74  
129.64  
127.99  
127.07  
126.40  
126.37  
123.02  
115.36  
115.14  
114.65

-60.52

13.62  
12.04

LZT-2038

C13CPD CDC13 {D:\NMR400\02T2} nmr 15

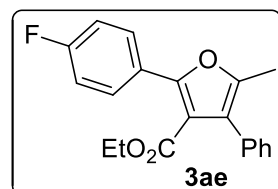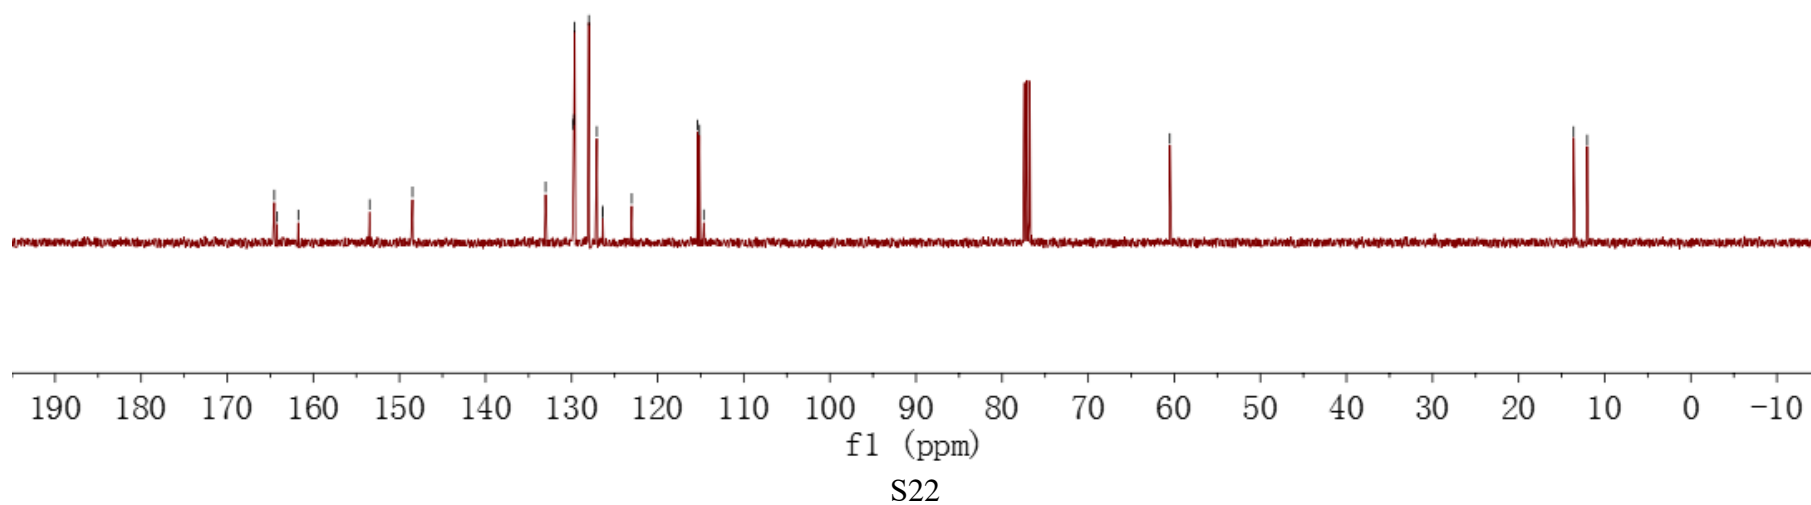

7.67  
7.66  
7.65  
7.65  
7.64  
7.46  
7.45  
7.44  
7.43  
7.31  
7.31  
7.31  
7.30  
7.29  
7.29  
7.28  
7.27  
7.27  
7.27  
7.25  
7.24  
7.24  
7.23  
7.23  
7.22  
7.21  
7.20  
7.20  
7.19  
7.19  
7.18  
7.18  
4.02  
4.00  
3.98  
3.96  
2.22  
0.89  
0.88  
0.86

LZT-2040

PROTON CDC13 {D:\NMR400\02T2} nmr 46

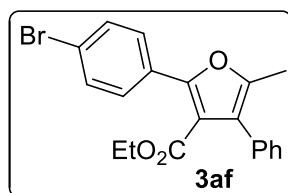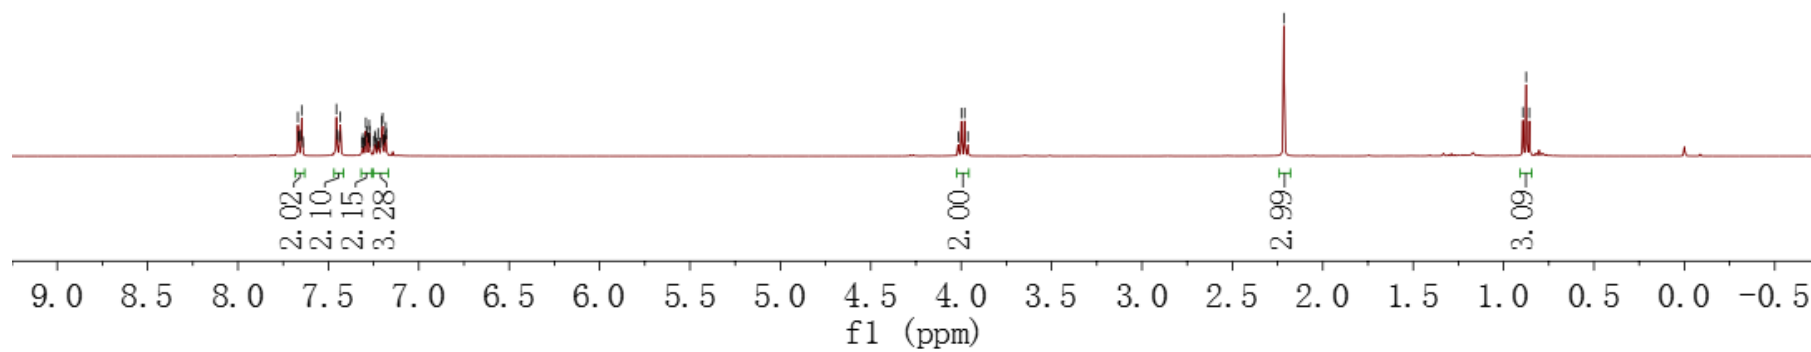

S23

LZT-2040

C13CPD CDC13 {D:\NMR400\02T2} nmr 46

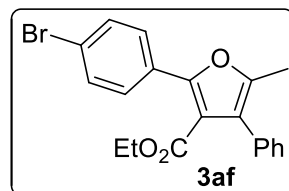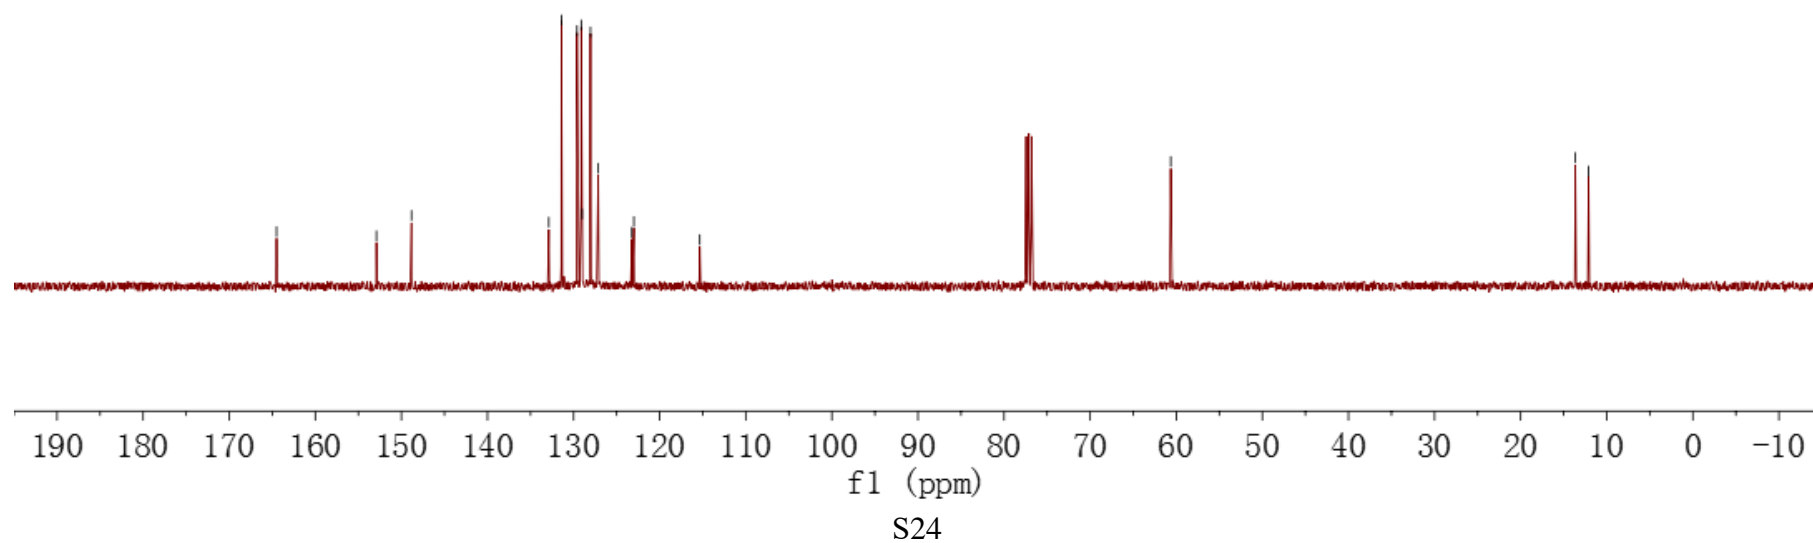



8.01  
8.00  
7.99  
7.70  
7.68  
7.42  
7.42  
7.41  
7.41  
7.40  
7.40  
7.39  
7.38  
7.38  
7.36  
7.36  
7.35  
7.35  
7.34  
7.33  
7.33  
7.32  
7.32  
7.29  
7.29  
7.28  
7.27  
7.27  
7.27  
7.26  
7.26  
4.13  
4.11  
4.09  
4.08  
-2.35

0.99  
0.97  
0.95

LZT-2811.10.fidPROTON CDC13 {D:\NMR400\02T2} nmr 56

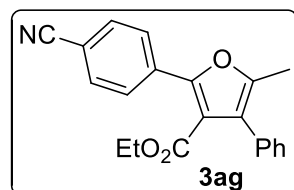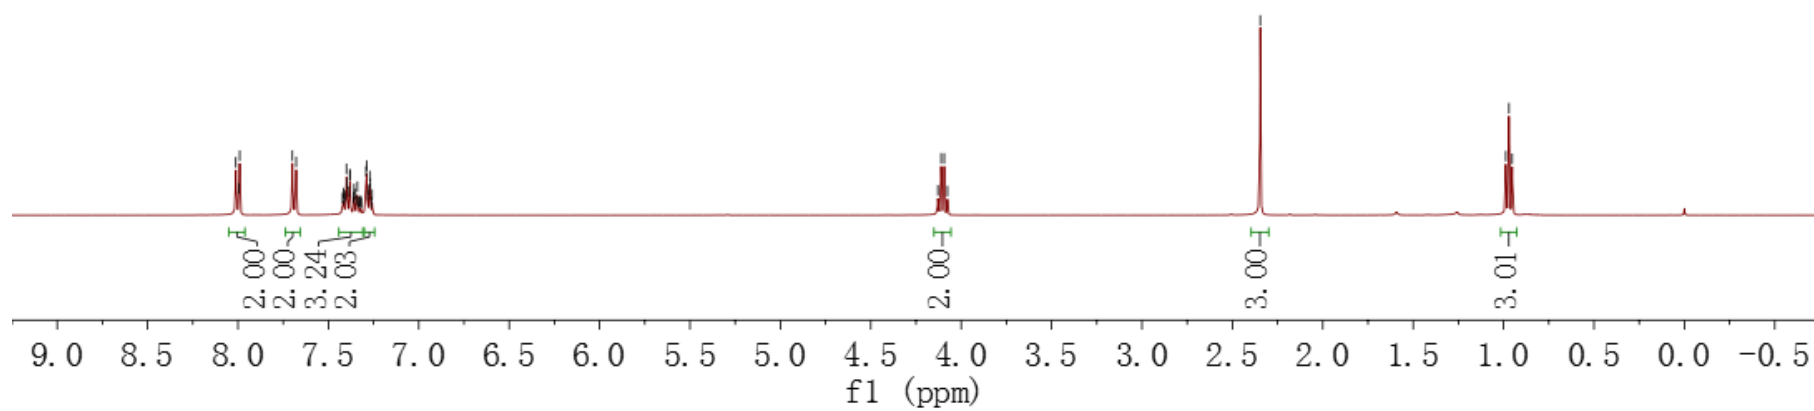

S25

-164.33  
 ~151.09  
 ~149.99  
 134.02  
 132.42  
 132.04  
 129.48  
 128.11  
 127.52  
 127.33  
 123.76  
 118.79  
 117.31  
 111.69

-60.93

~13.56  
 ~12.16

LZT-2811.11.fidC13CPD CDC13 {D:\NMR400\02T2} nmr 56

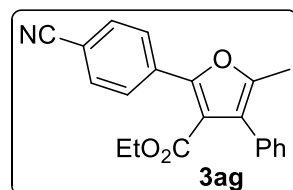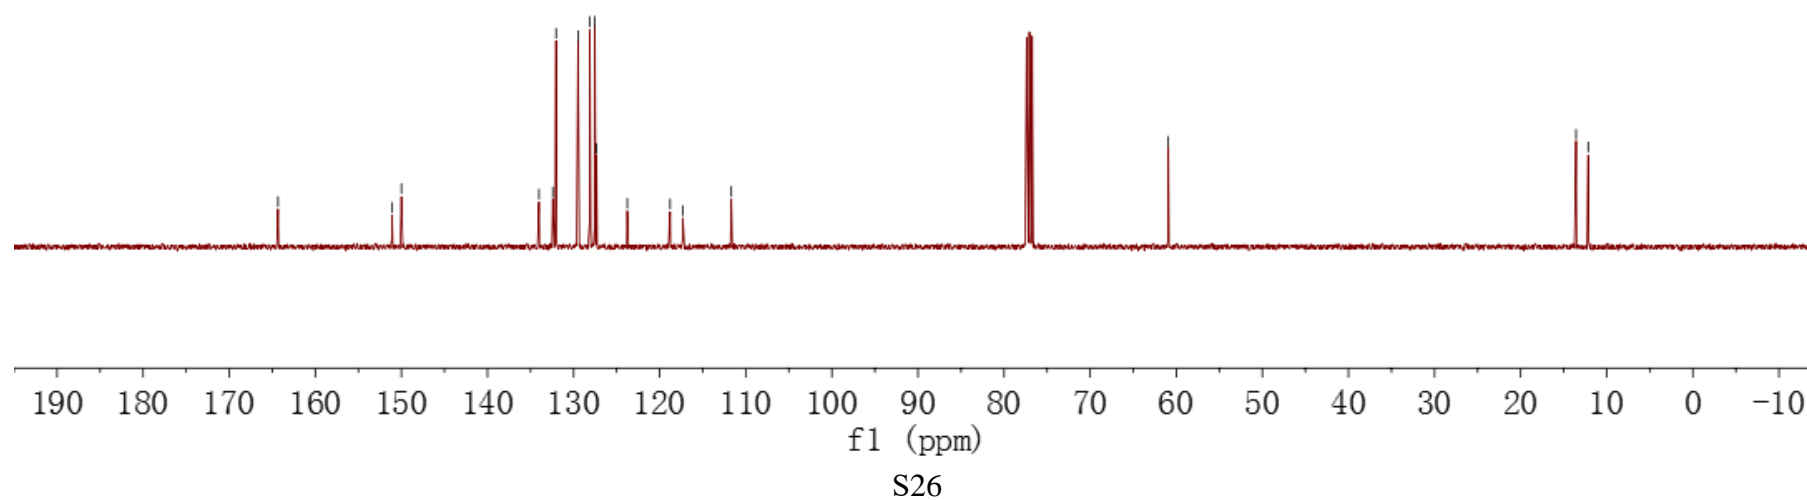

7.74  
7.74  
7.73  
7.72  
7.40  
7.40  
7.39  
7.38  
7.38  
7.37  
7.36  
7.36  
7.36  
7.33  
7.32  
7.32  
7.31  
7.30  
7.29  
7.29  
7.28  
7.28  
7.23  
7.23  
7.21  
4.11  
4.09  
4.07  
4.05

2.38  
2.31

0.99  
0.98  
0.96

LZT-2037  
PROTON CDC13 {D:\NMR400\02T2} nmr 38

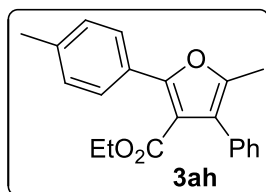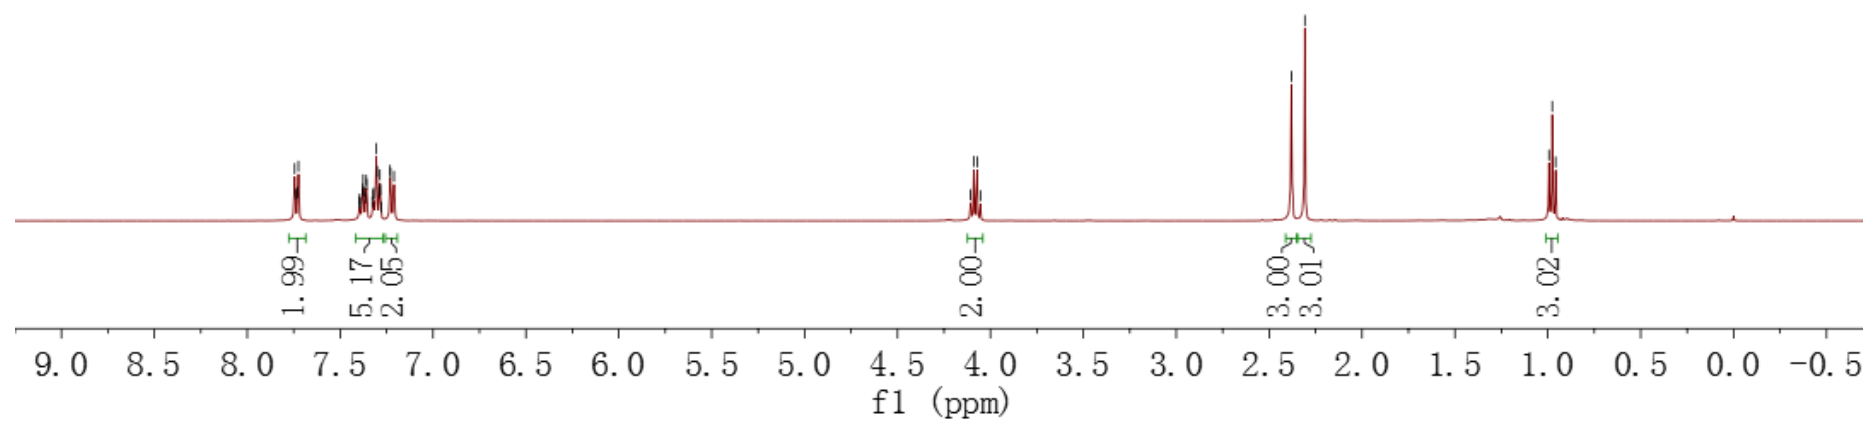

LZT-2037

C13CPD CDC13 {D:\NMR400\02T2} nmr 38

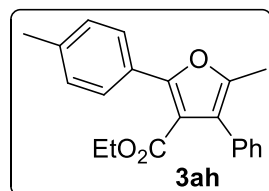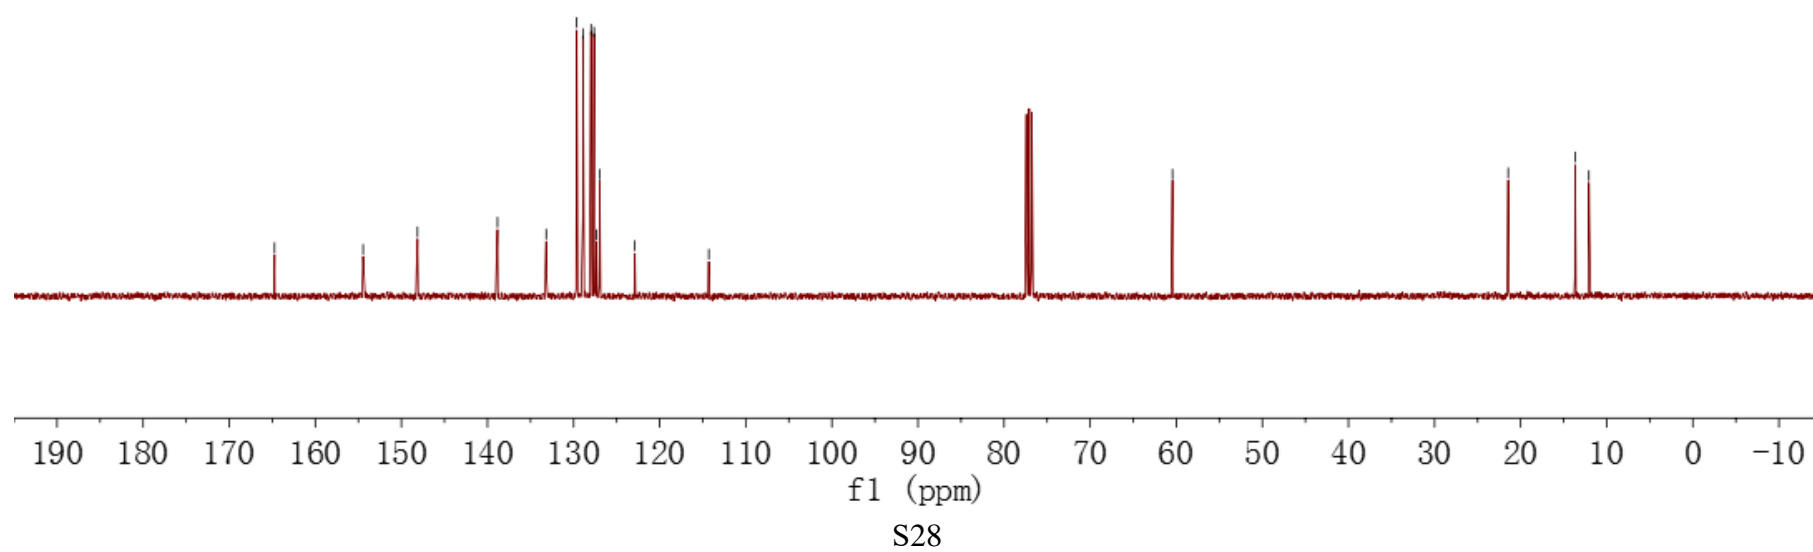

7.82 7.82 7.81 7.80 7.40 7.38 7.38 7.36 7.32 7.32 7.31 7.30 7.30 7.29 7.28 7.28 6.96 6.95 6.94 6.94 4.10 4.08 4.06 4.04 3.84 -2.30 0.98 0.97 0.95

LZT-2048

PROTON CDC13 {D:\NMR400\02T2} nmr 13

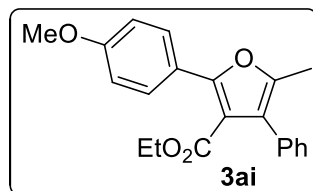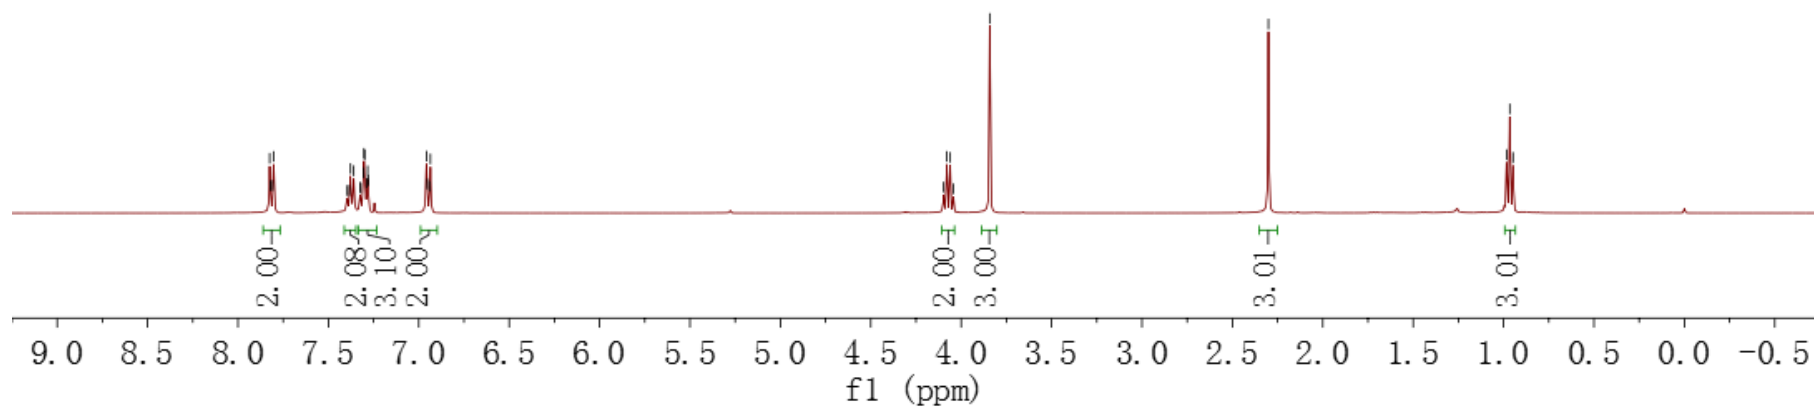

S29

~164.72  
 ~160.06  
 ~154.64  
 ~147.85  
 ~133.30  
 ~129.66  
 ~129.32  
 ~127.92  
 ~126.91  
 ~122.86  
 ~122.82  
 ~113.60

-60.34  
 -55.33

~13.67  
 ~12.04

LZT-2048

C13CPD CDC13 {D:\NMR400\02T2} nmr 13

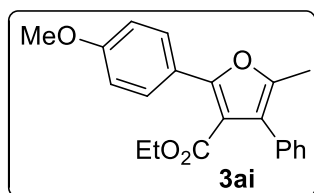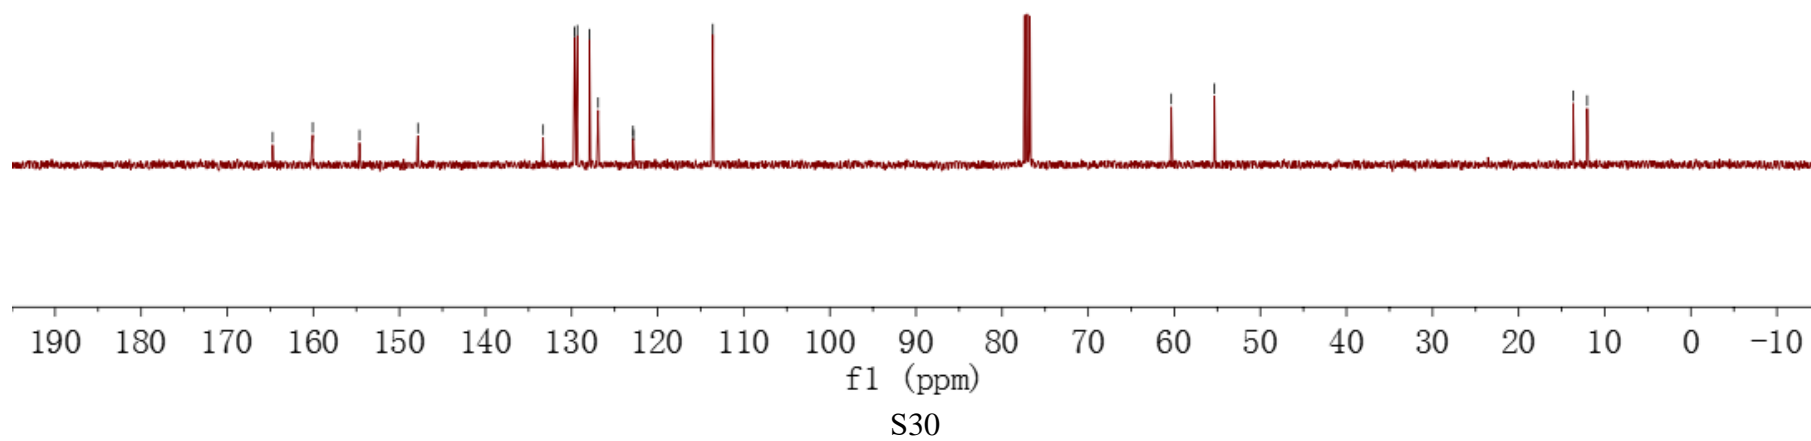



165.09  
 156.48  
 155.00  
 147.85  
 141.50  
 133.29  
 129.65  
 129.56  
 127.89  
 126.91  
 122.74  
 115.22  
 113.39  
 60.51  
 13.56  
 11.99

LZT-2818.11.fidC13CPD CDC13 {D:\NMR400\02T2} nmr 52

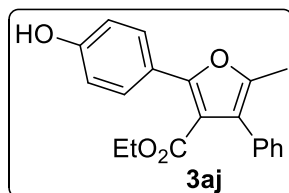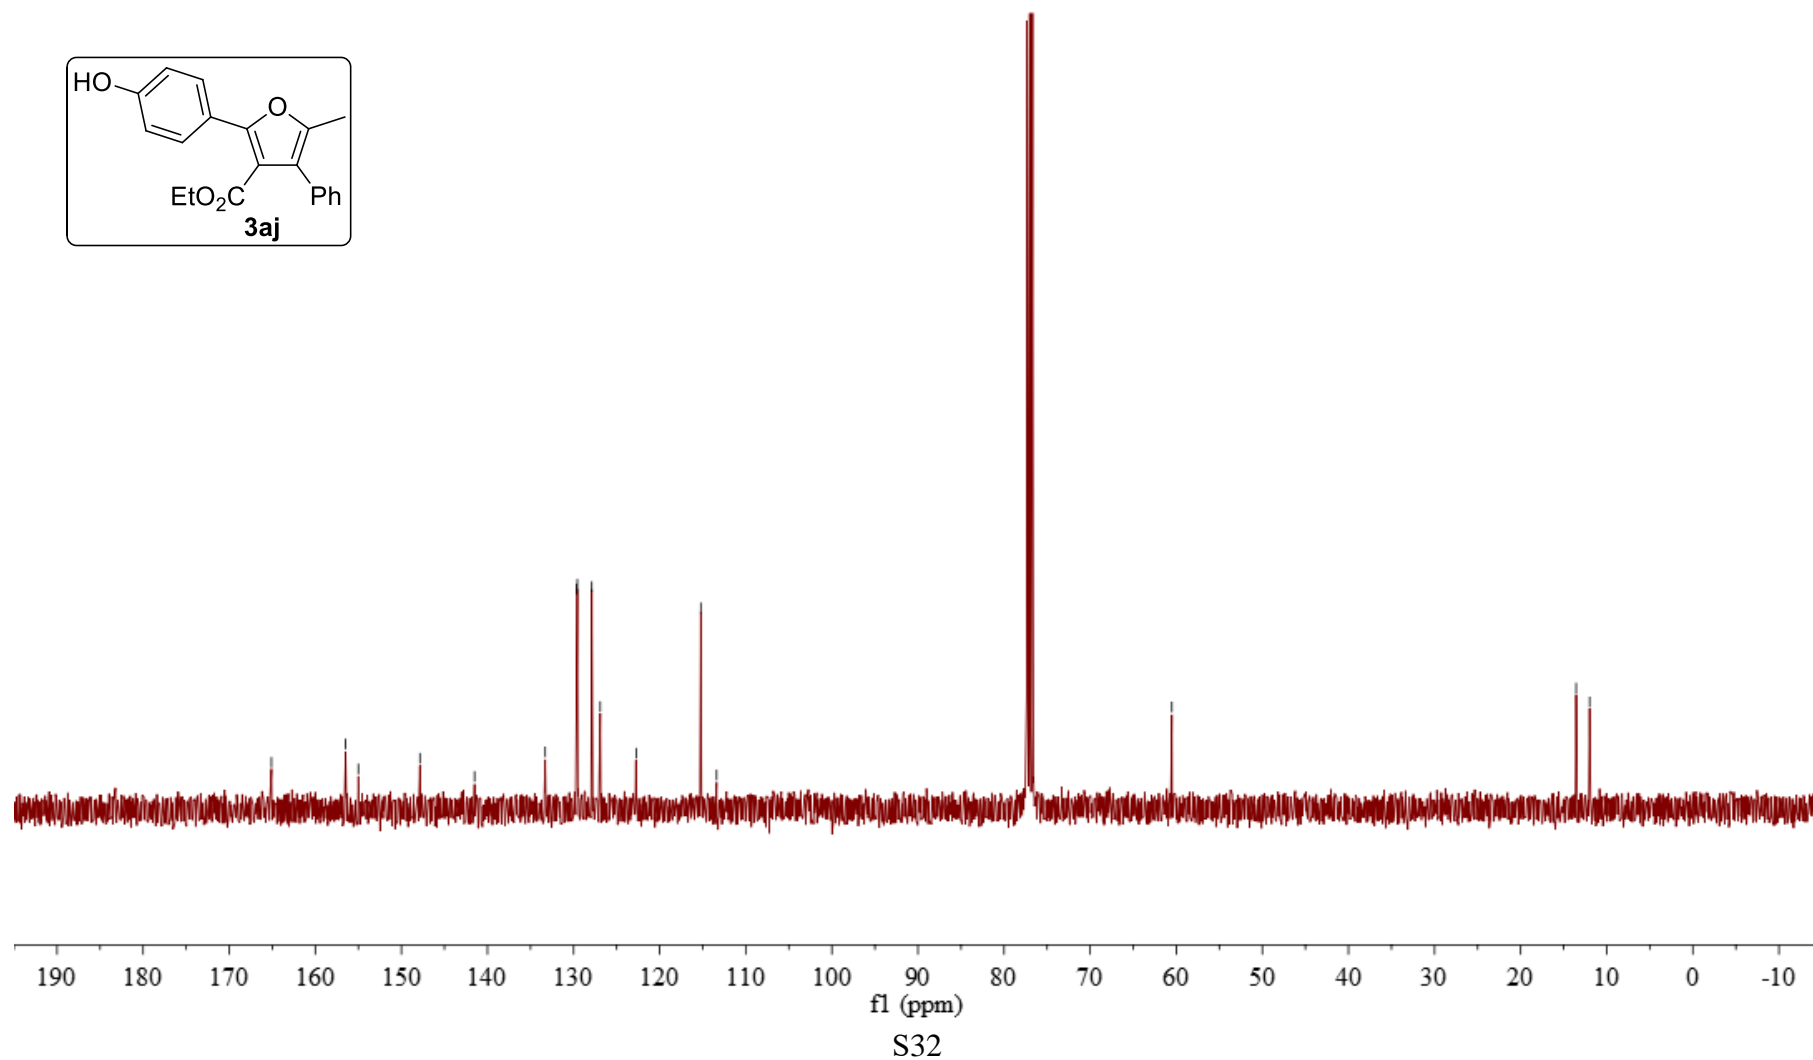



8.17  
7.79  
7.77  
7.58  
7.55  
7.39  
7.39  
7.37  
7.37  
7.35  
7.32  
7.32  
7.32  
7.31  
7.30  
7.30  
7.29  
7.28  
7.28  
7.27  
7.27  
7.26  
7.25

4.11  
4.09  
4.08  
4.06

-2.30  
-2.12

0.99  
0.98  
0.96

LZT-2819.10.fidPROTON CDC13 {D:\NMR400\02T2} nmr 52

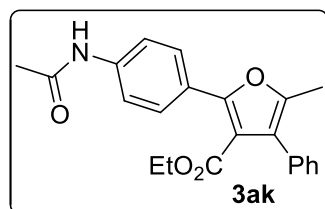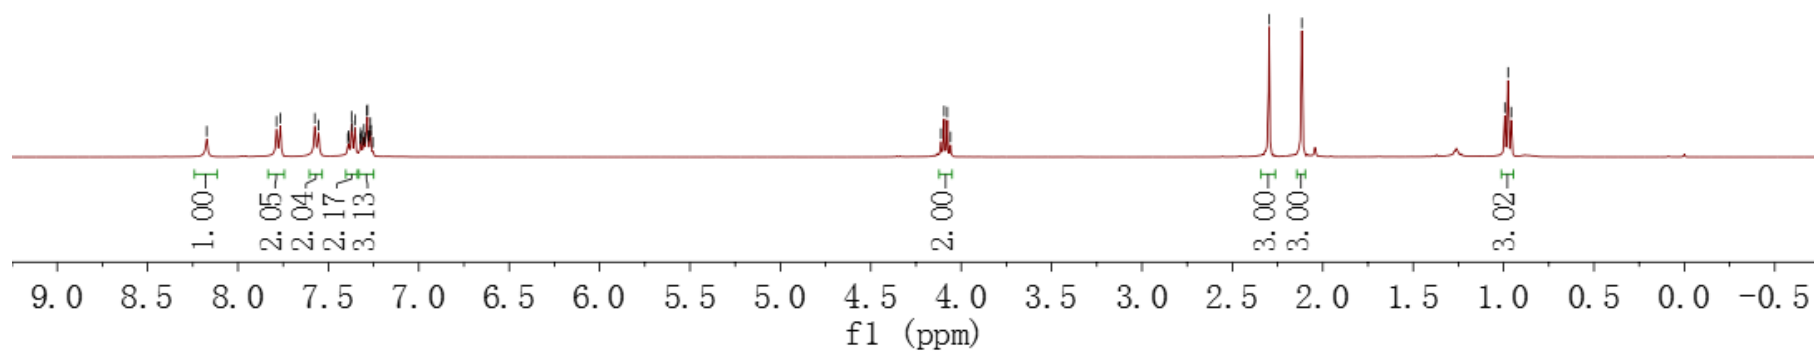

S33

-168.92  
 -164.96  
 -153.95  
 -148.29  
 -138.72  
 -133.02  
 -129.57  
 -128.27  
 -127.98  
 -127.02  
 -125.70  
 -122.92  
 -119.30  
 -114.21

-60.59

-24.50

-13.65  
 -12.03

LZT-2819.11.fidC13CPD CDC13 {D:\NMR400\02T2} nmr 52

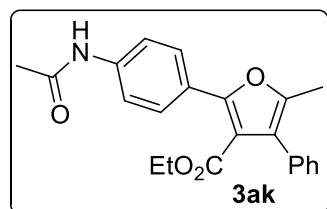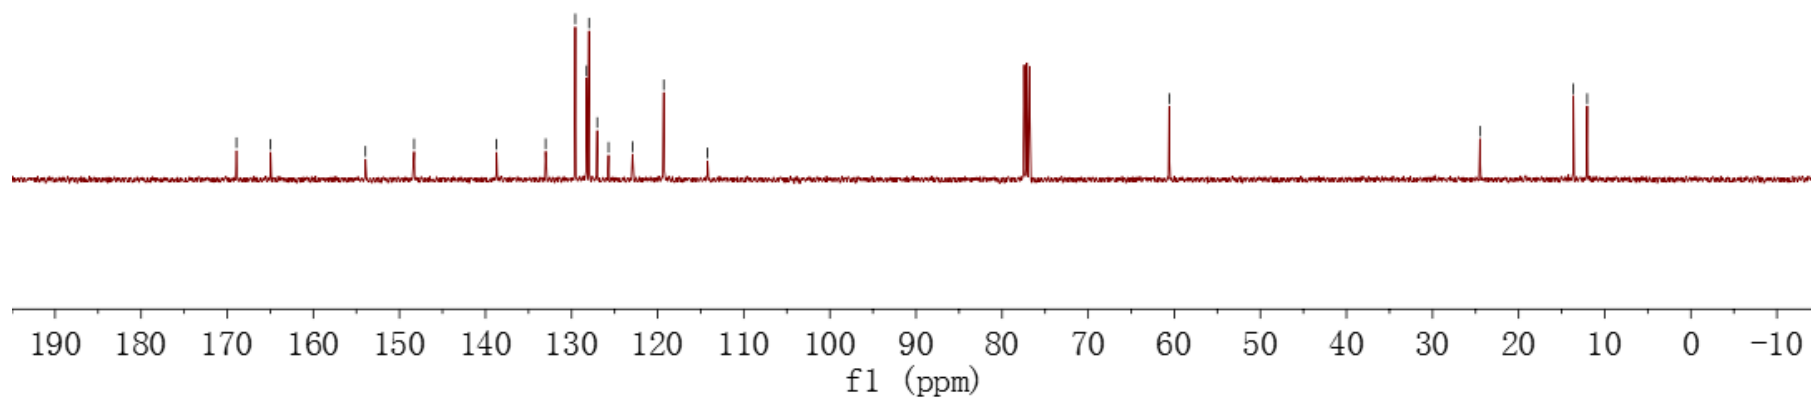

S34

8.37  
8.37  
7.94  
7.93  
7.92  
7.91  
7.90  
7.90  
7.89  
7.88  
7.87  
7.85  
7.84  
7.83  
7.82  
7.82  
7.50  
7.50  
7.49  
7.48  
7.47  
7.46  
7.42  
7.42  
7.41  
7.40  
7.40  
7.40  
7.39  
7.39  
7.38  
7.34  
7.34  
7.32  
7.32  
7.31  
7.30  
4.15  
4.13  
4.11  
4.10  
2.36  
1.01  
0.99  
0.98

LZT-2043.10.fid  
PROTON CDC13 {D:\NMR400\02T2} nmr 47

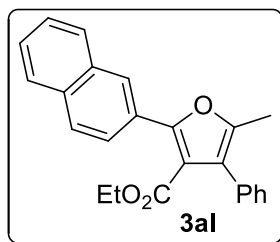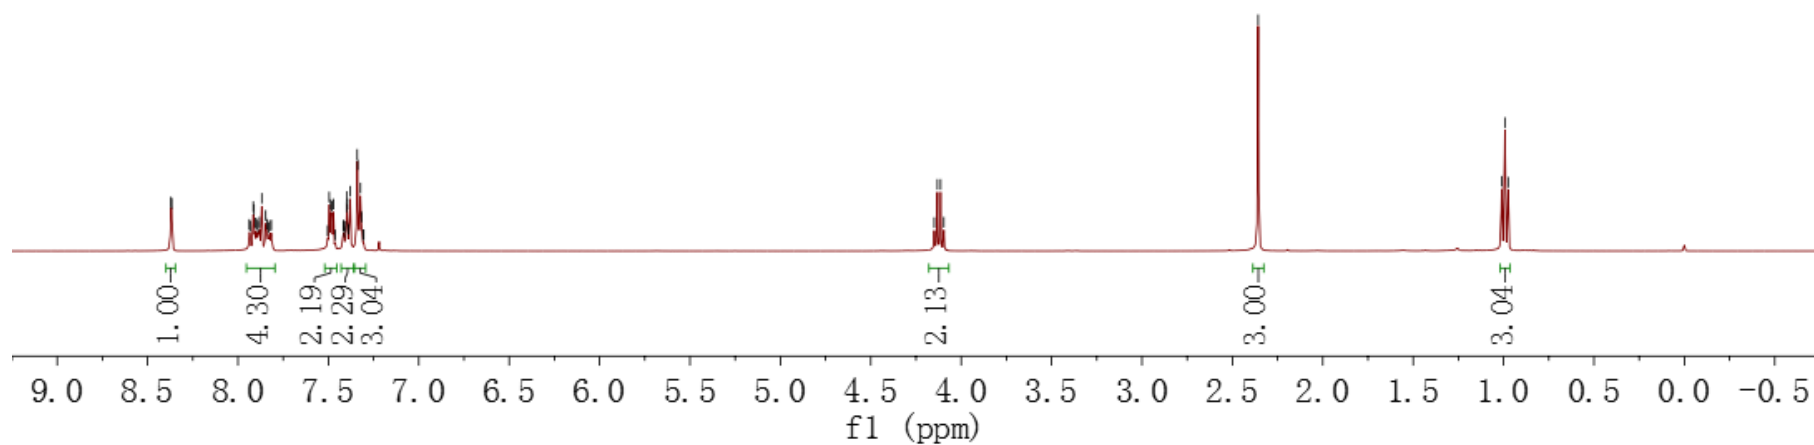

S35

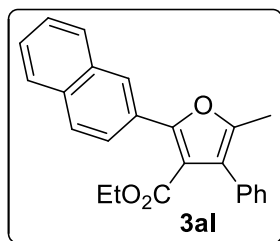

LZT-2043.11.fid  
C13CPD CDC13 {D:\NMR400\02T2} nmr 47

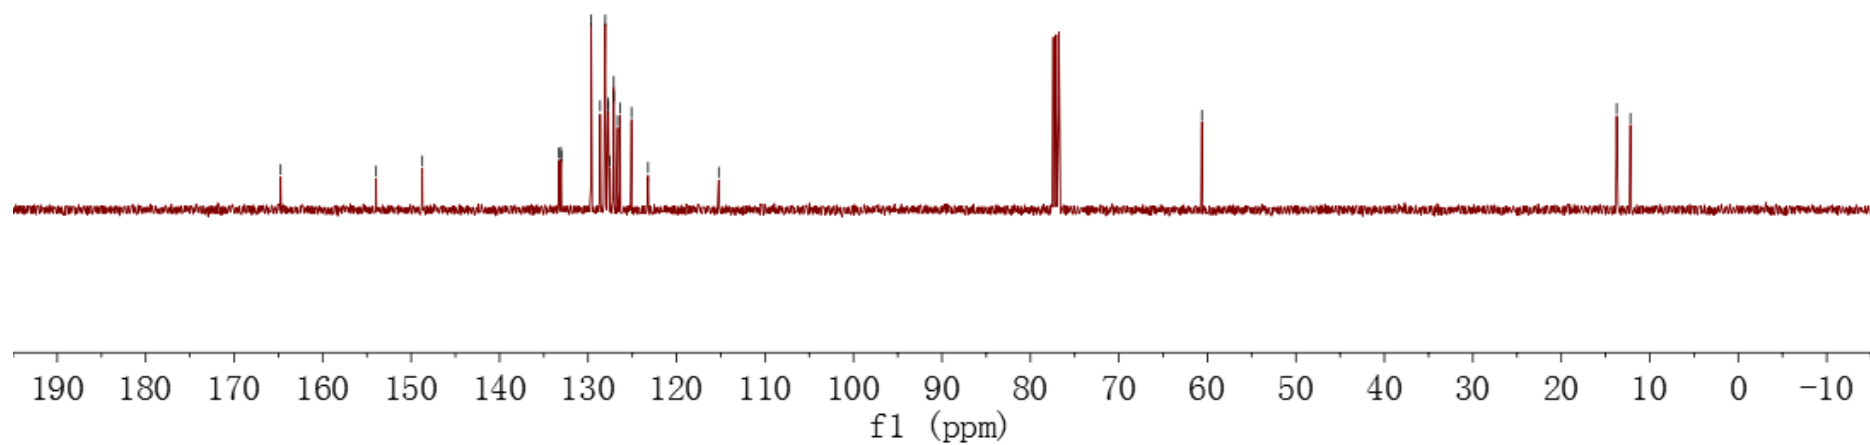

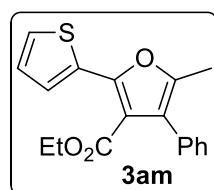

LZT-2051  
 PROTON CDC13 {D:\NMR400\02T2} nmr 27

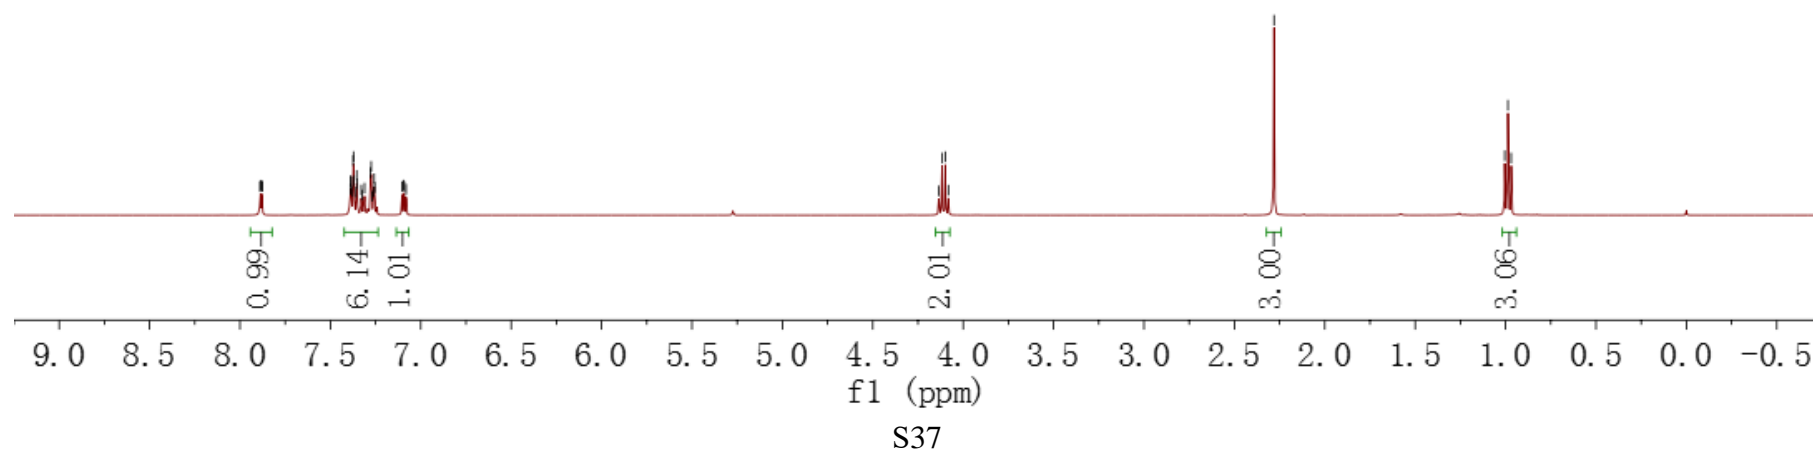

7.89  
 7.89  
 7.88  
 7.88  
 7.39  
 7.39  
 7.38  
 7.38  
 7.37  
 7.37  
 7.37  
 7.36  
 7.35  
 7.35  
 7.33  
 7.33  
 7.31  
 7.28  
 7.27  
 7.27  
 7.26  
 7.26  
 7.25  
 7.10  
 7.09  
 7.09  
 7.08  
 4.14  
 4.12  
 4.10  
 4.08  
 -2.28  
 1.00  
 0.99  
 0.97

LZT-2051

C13CPD CDC13 {D:\NMR400\02T2} nmr 27

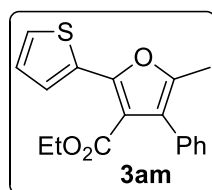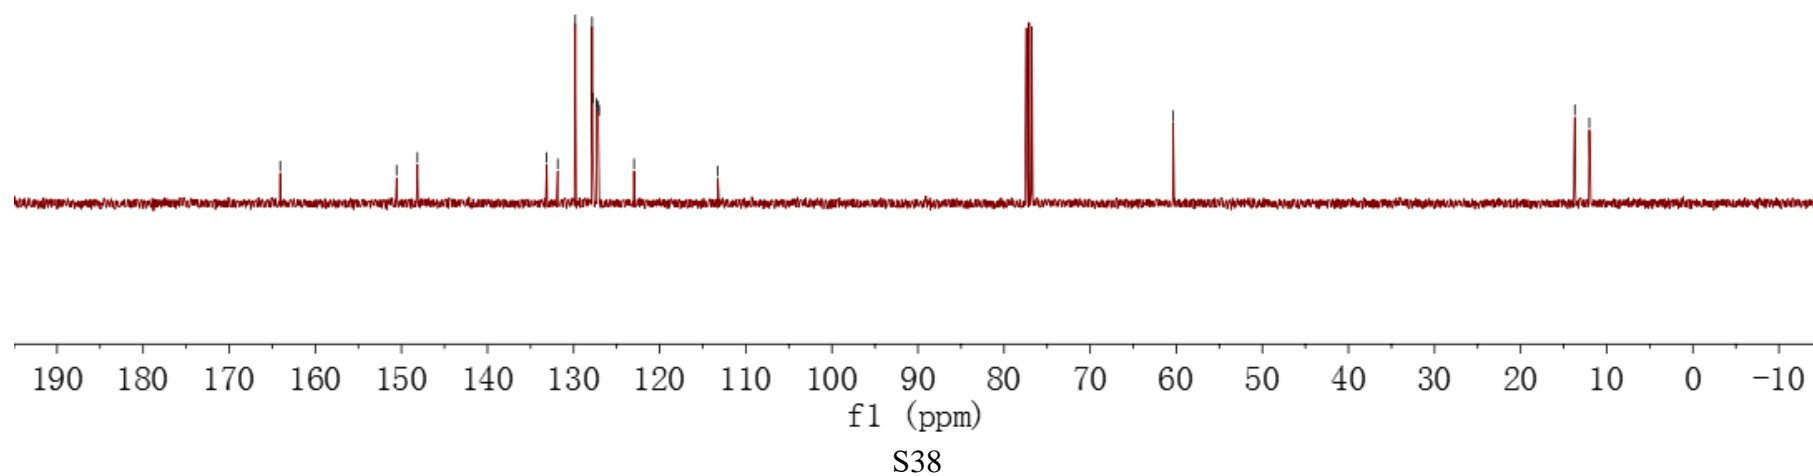

7.37  
7.37  
7.35  
7.35  
7.35  
7.33  
7.33  
7.31  
7.30  
7.30  
7.28  
7.26  
7.26  
7.25  
7.25  
7.24  
7.23  
7.23

4.14  
4.12  
4.10  
4.08

-2.57

-2.19

1.10  
1.09  
1.07

LZT-2050.10.fid  
PROTON CDC13 {D:\NMR400\02T2} nmr 19

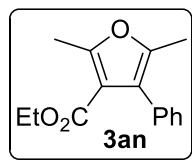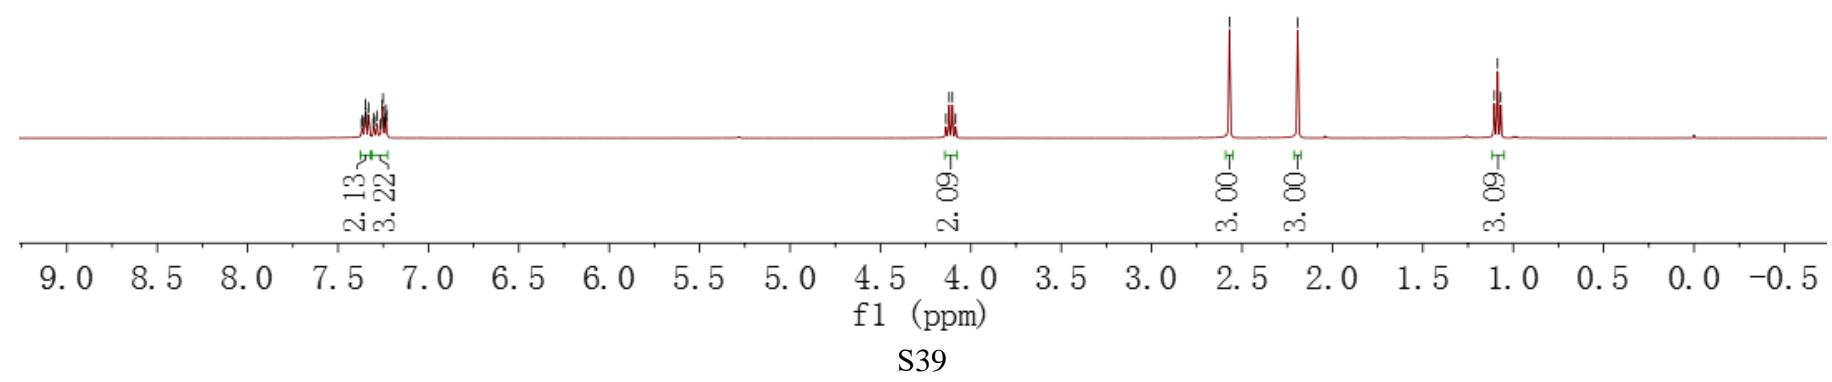

LZT-2050.11.fid  
 C13CPD CDC13 {D:\NMR400\02T2} nmr 19

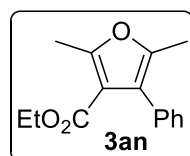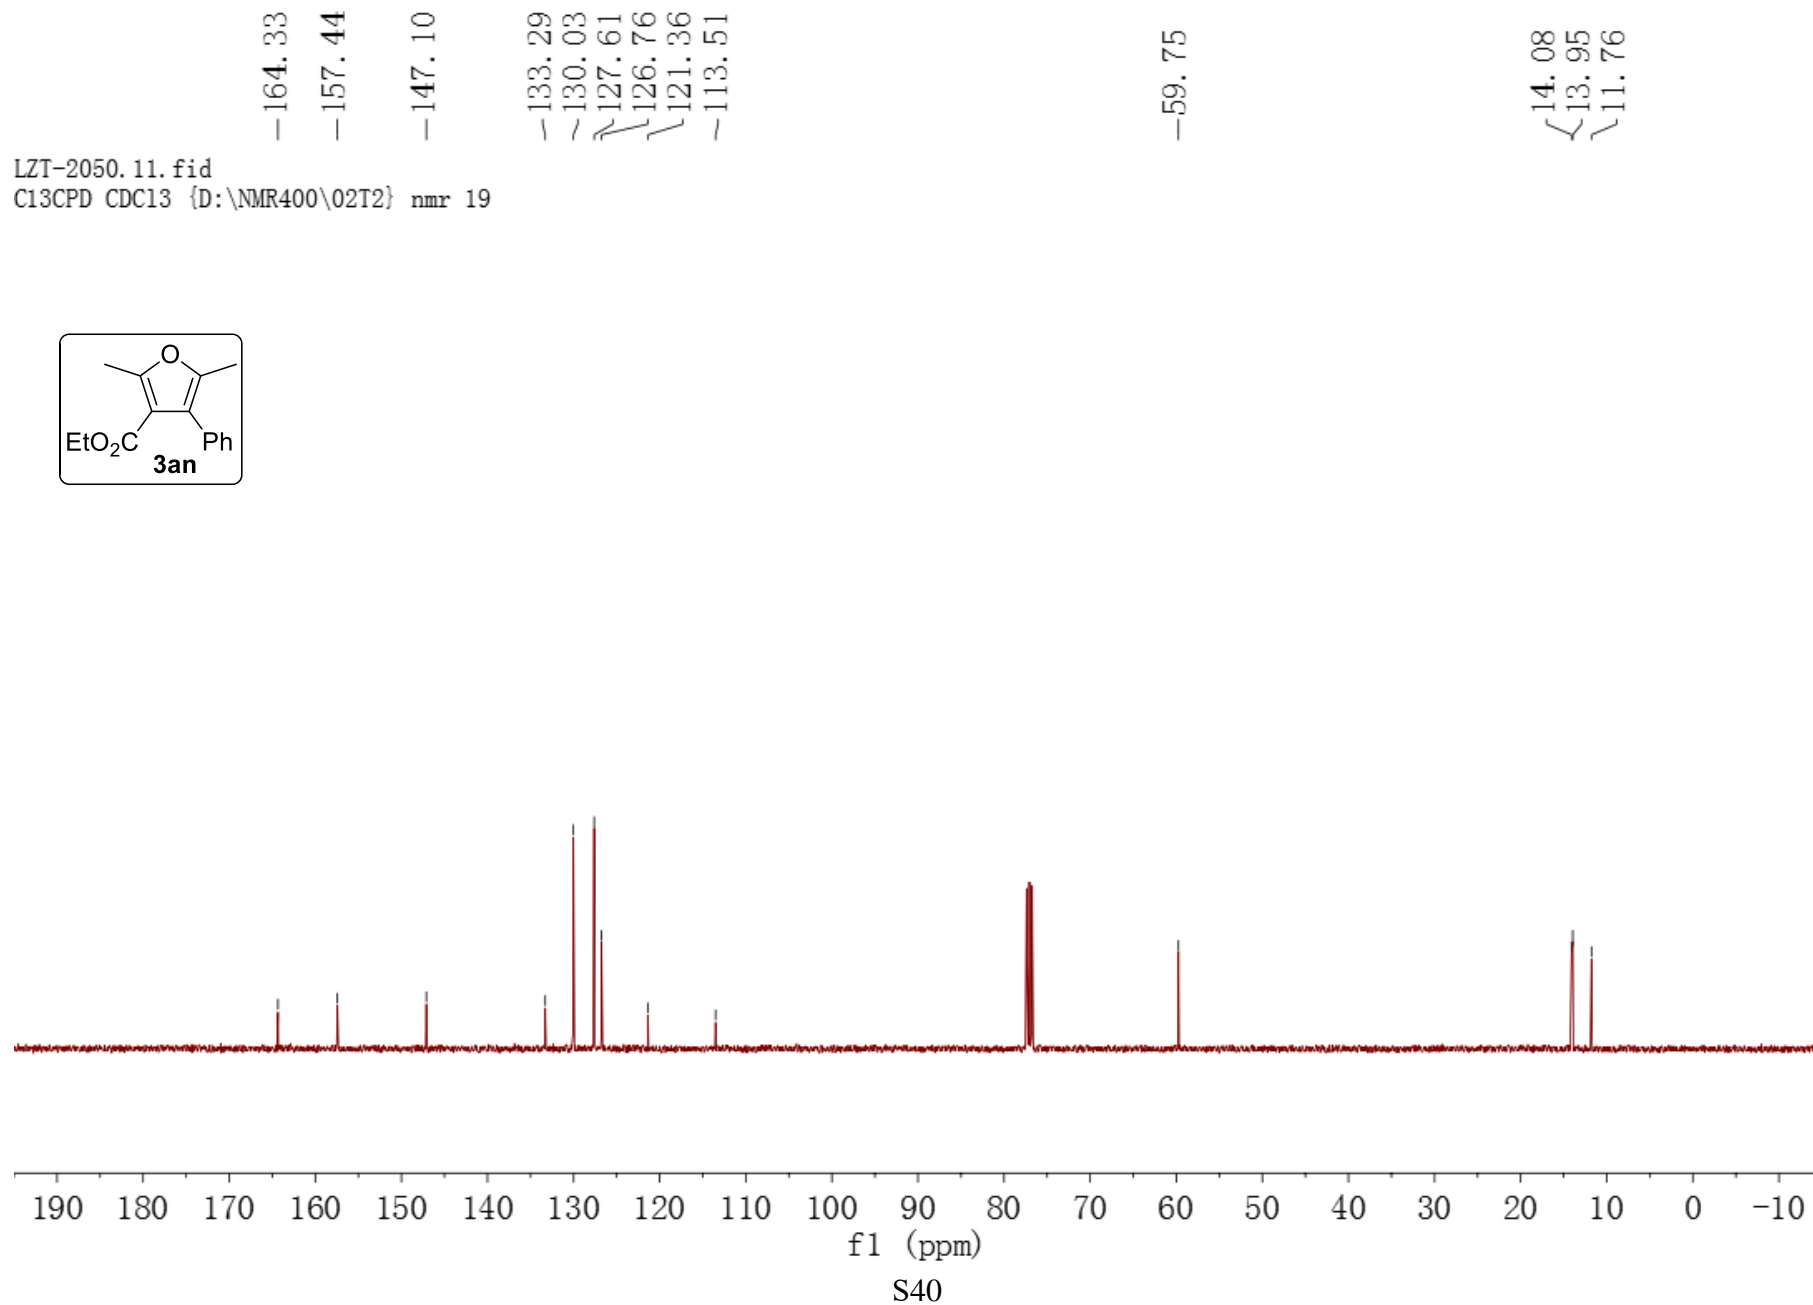



7.37  
7.36  
7.36  
7.35  
7.34  
7.34  
7.33  
7.33  
7.32  
7.30  
7.29  
7.29  
7.28  
7.28  
7.27  
7.26  
7.26  
7.25  
7.25  
7.24  
7.24  
7.23  
7.23  
4.12  
4.10  
4.08  
4.07  
3.76  
3.74  
3.72  
3.70  
3.69

-2.20

1.31  
1.29  
1.07  
1.05  
1.04

LZT-2049.10.fid  
PROTON CDC13 {D:\NMR400\02T2} nmr 18

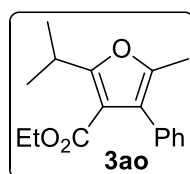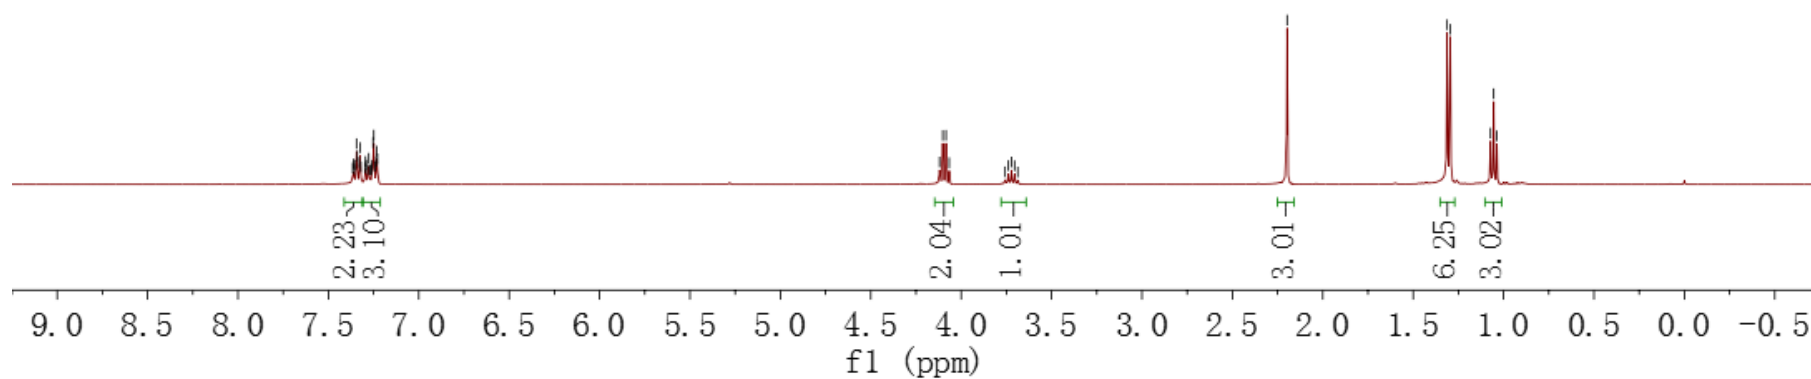

S41

165.21  
164.34

146.90

133.51

129.99

127.60

126.67

121.10

111.72

59.73

27.30

20.98

13.85

11.82

LZT-2049.11.fid

C13CPD CDC13 {D:\NMR400\02T2} nmr 18

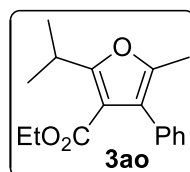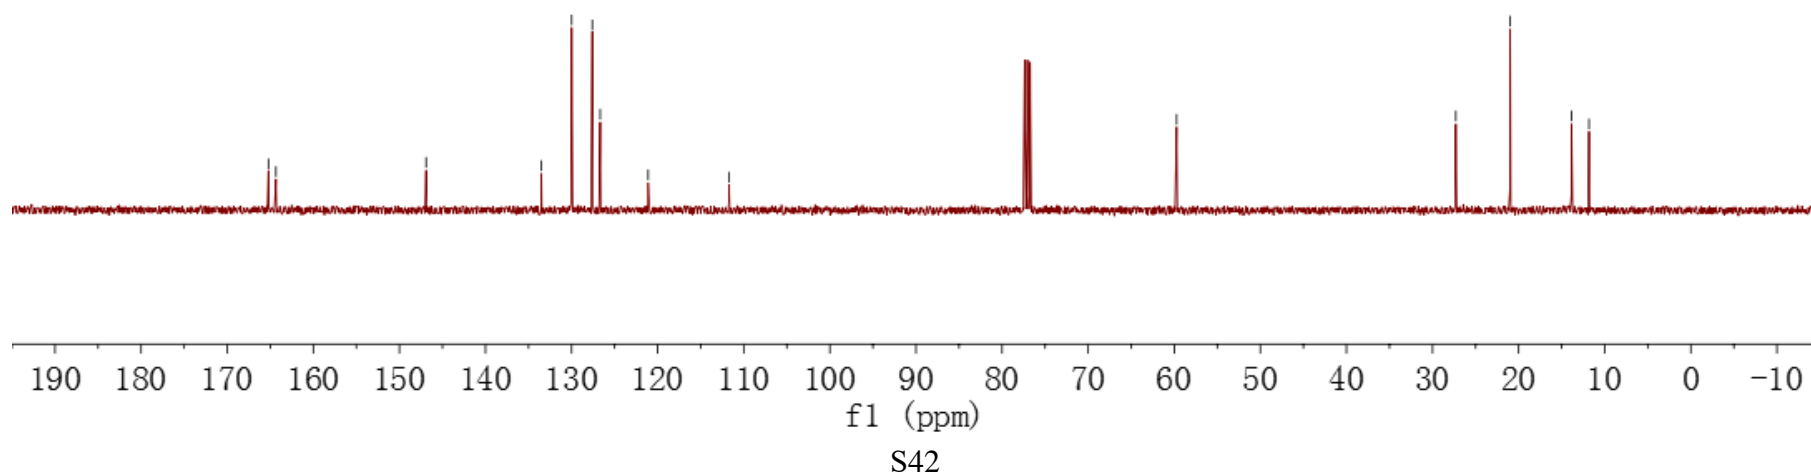

7.73  
7.73  
7.71  
7.71  
7.36  
7.35  
7.35  
7.34  
7.33  
7.32  
7.31  
7.29  
7.28  
7.27  
7.26  
7.25  
7.25  
7.23  
7.23  
7.23  
7.21  
7.21  
7.15

-3.52

-2.25

LZT-1400

PROTON CDC13 {D:\NMR400\02T2} nmr 40

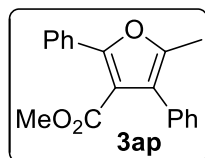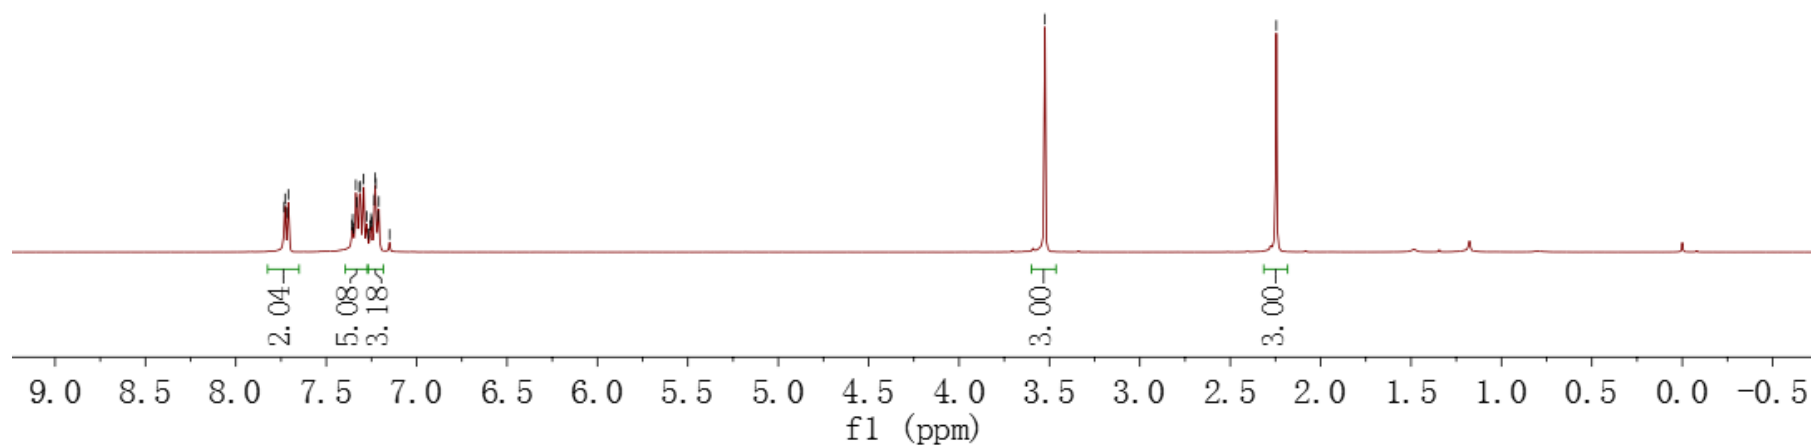

S43

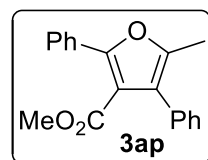

LZT-1400

C13CPD CDC13 {D:\NMR400\02T2} nmr 40

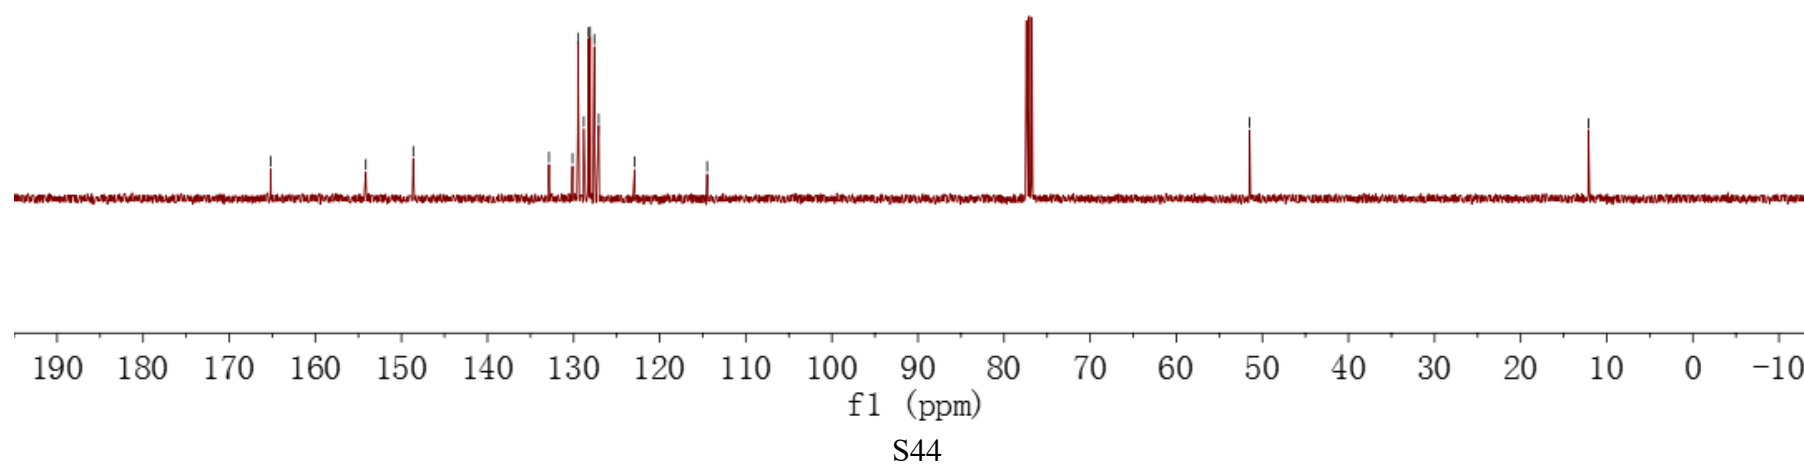

7.82 7.82 7.81 7.80 7.80 7.80 7.79 7.43 7.42 7.42 7.40 7.40 7.39 7.39 7.38 7.38 7.36 7.36 7.36 7.35 7.34 7.34 7.33 7.32 7.32 7.23 7.22 7.22 7.20 7.19 7.18 7.18 4.13 4.12 4.10 4.08 2.38 2.31 1.03 1.02 1.00

LZT-2072.10.fid  
 PROTON CDC13 {D:\NMR400\02T2} nmr 30

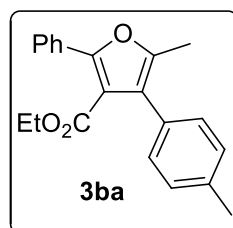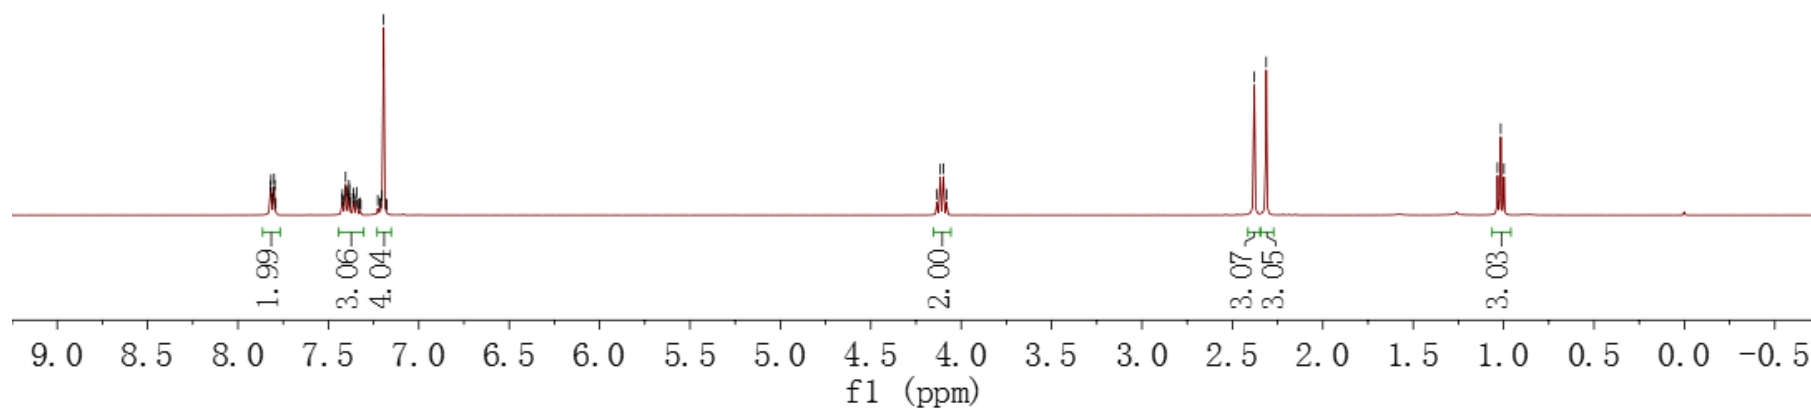

S45

LZT-2072.11.fid  
 C13CPD CDC13 {D:\NMR400\02T2} nmr 30

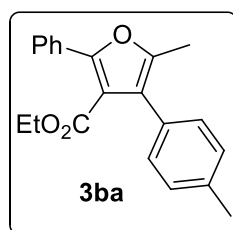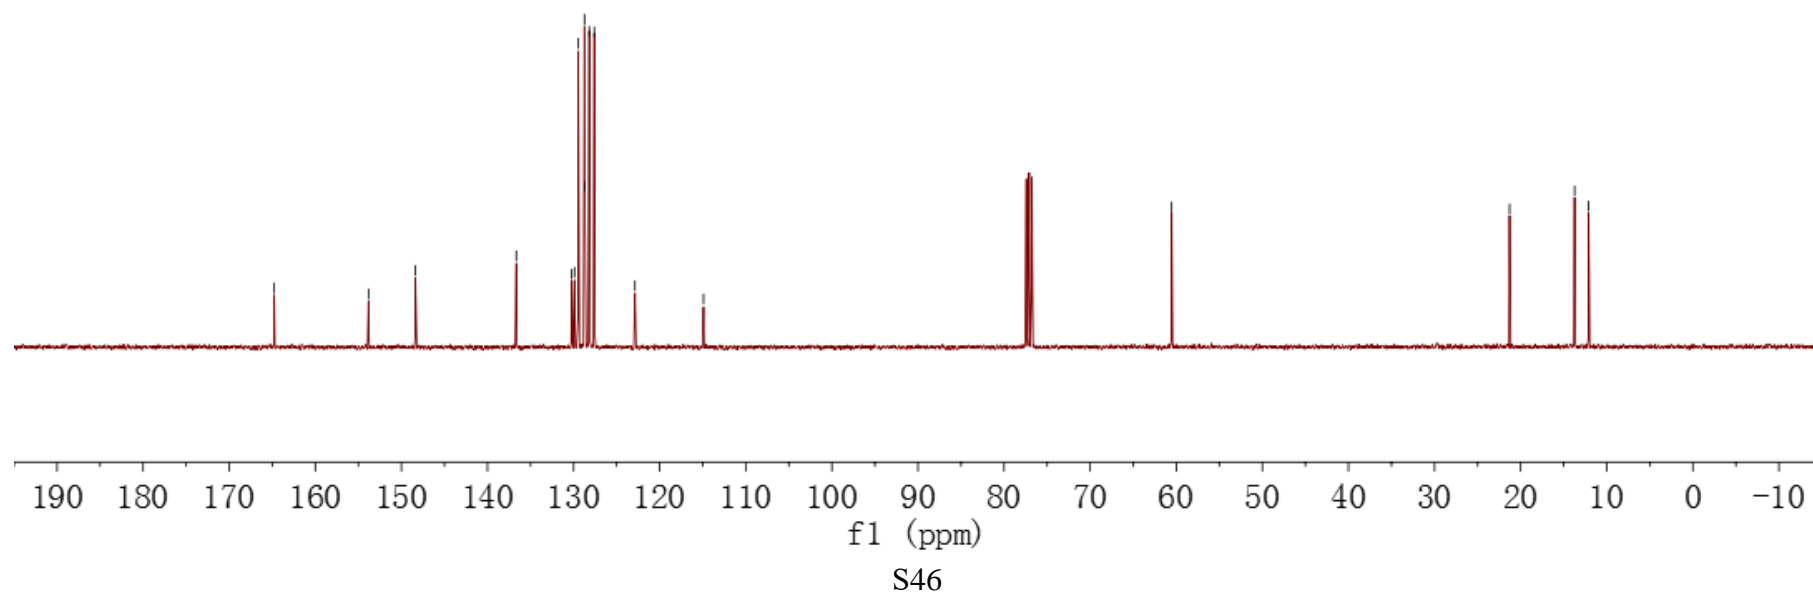

7.82 7.82 7.81 7.80 7.80 7.80 7.42 7.42 7.42 7.40 7.40 7.38 7.36 7.36 7.36 7.35 7.34 7.33 7.33 7.32 7.32 7.25 7.24 7.24 7.23 7.23 7.22 7.21 6.95 6.94 6.93 6.92 6.92 6.91 4.14 4.12 4.10 4.08 3.82 2.30 1.05 1.03 1.01

LZT-2073.10.fid  
 PROTON CDC13 {D:\NMR400\02T2} nmr 27

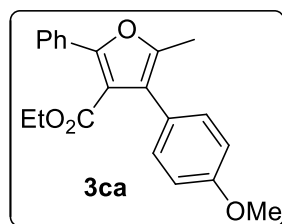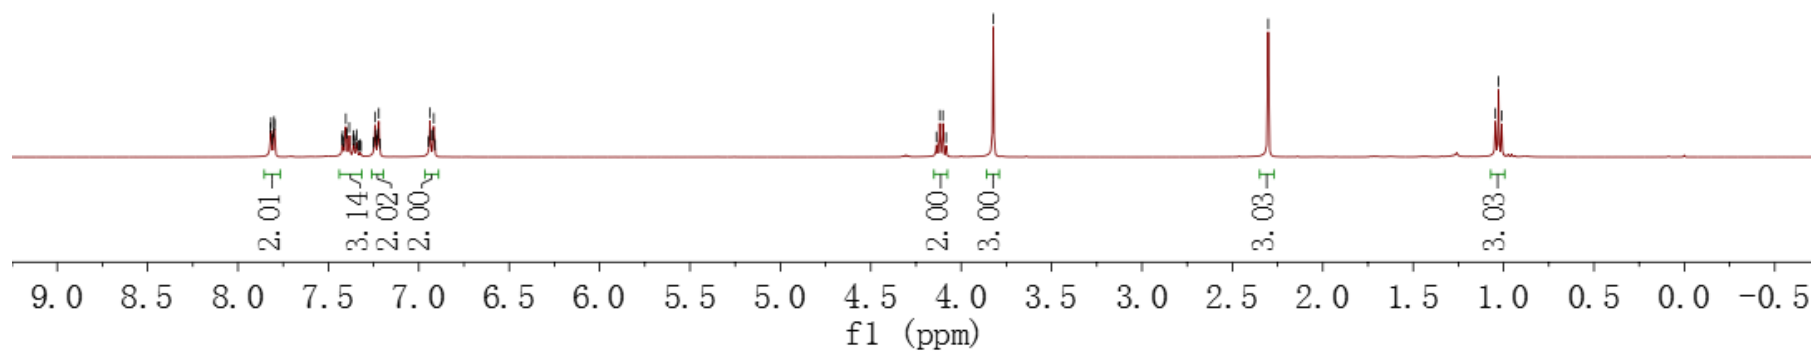

S47

164.77  
 158.72  
 153.85  
 148.36  
 130.77  
 130.23  
 128.71  
 128.18  
 127.60  
 125.19  
 122.54  
 114.92  
 113.48

60.52  
 55.27

13.80  
 12.07

LZT-2073.11.fid  
 C13CPD CDC13 {D:\NMR400\02T2} nmr 36

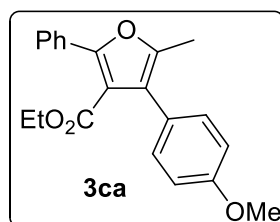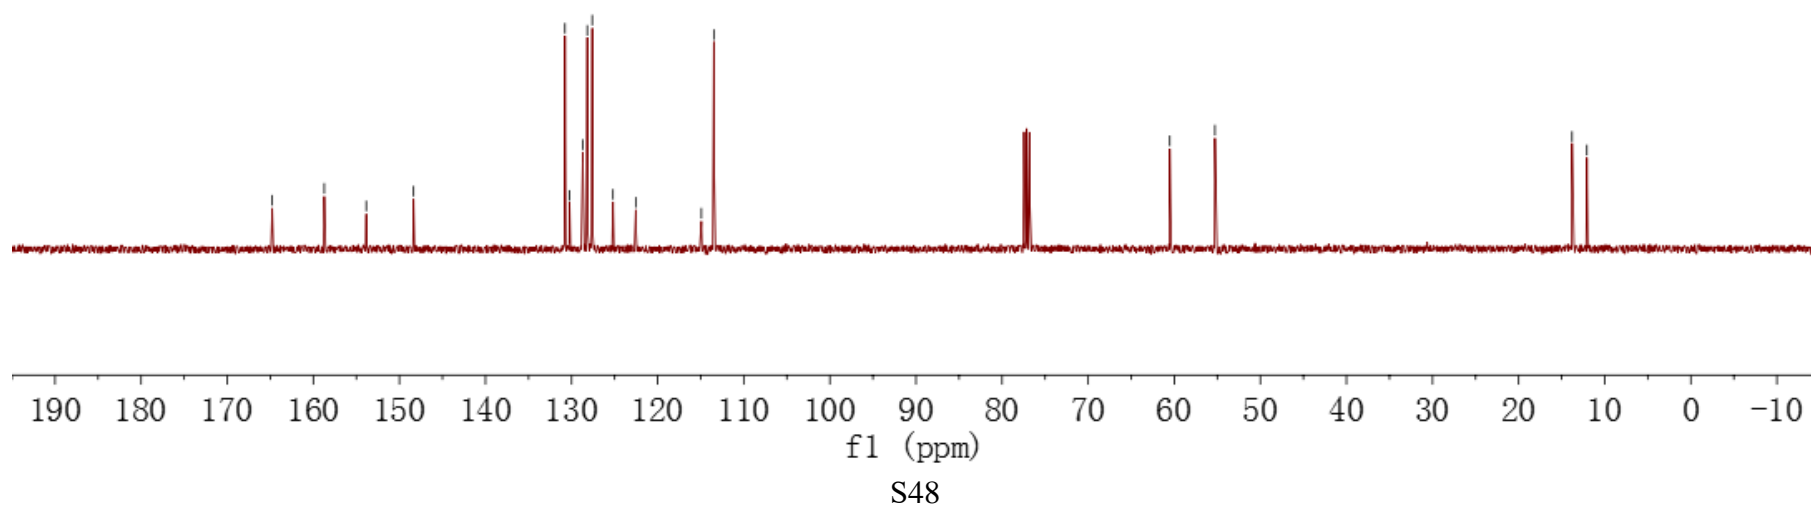



7.79  
7.78  
7.78  
7.77  
7.77  
7.76  
7.43  
7.43  
7.42  
7.41  
7.40  
7.39  
7.39  
7.39  
7.38  
7.38  
7.37  
7.37  
7.36  
7.35  
7.35  
7.34  
7.34  
7.33  
7.15  
7.15  
7.14  
7.13  
6.80  
6.80  
6.79  
6.78  
5.84  
4.17  
4.15  
4.13  
4.11  
2.30  
1.07  
1.05  
1.04

LZT-2813.10.fidPROTON CDC13 {D:\NMR400\02T2} nmr 54

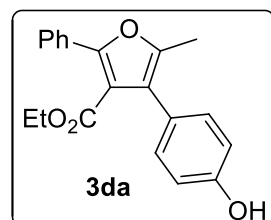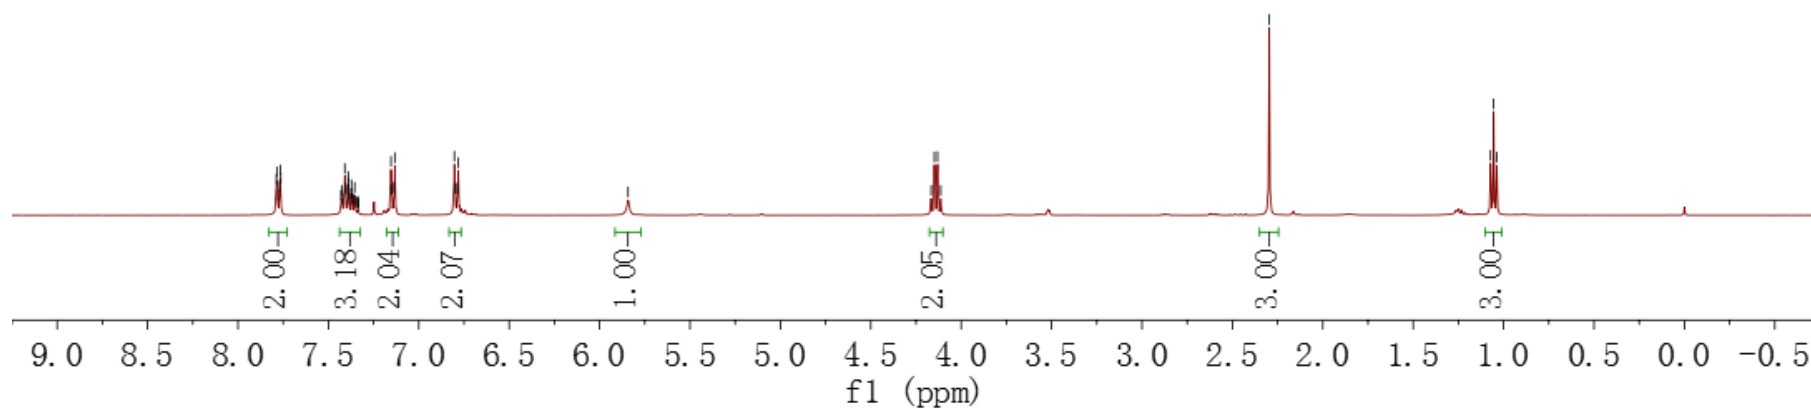

S49

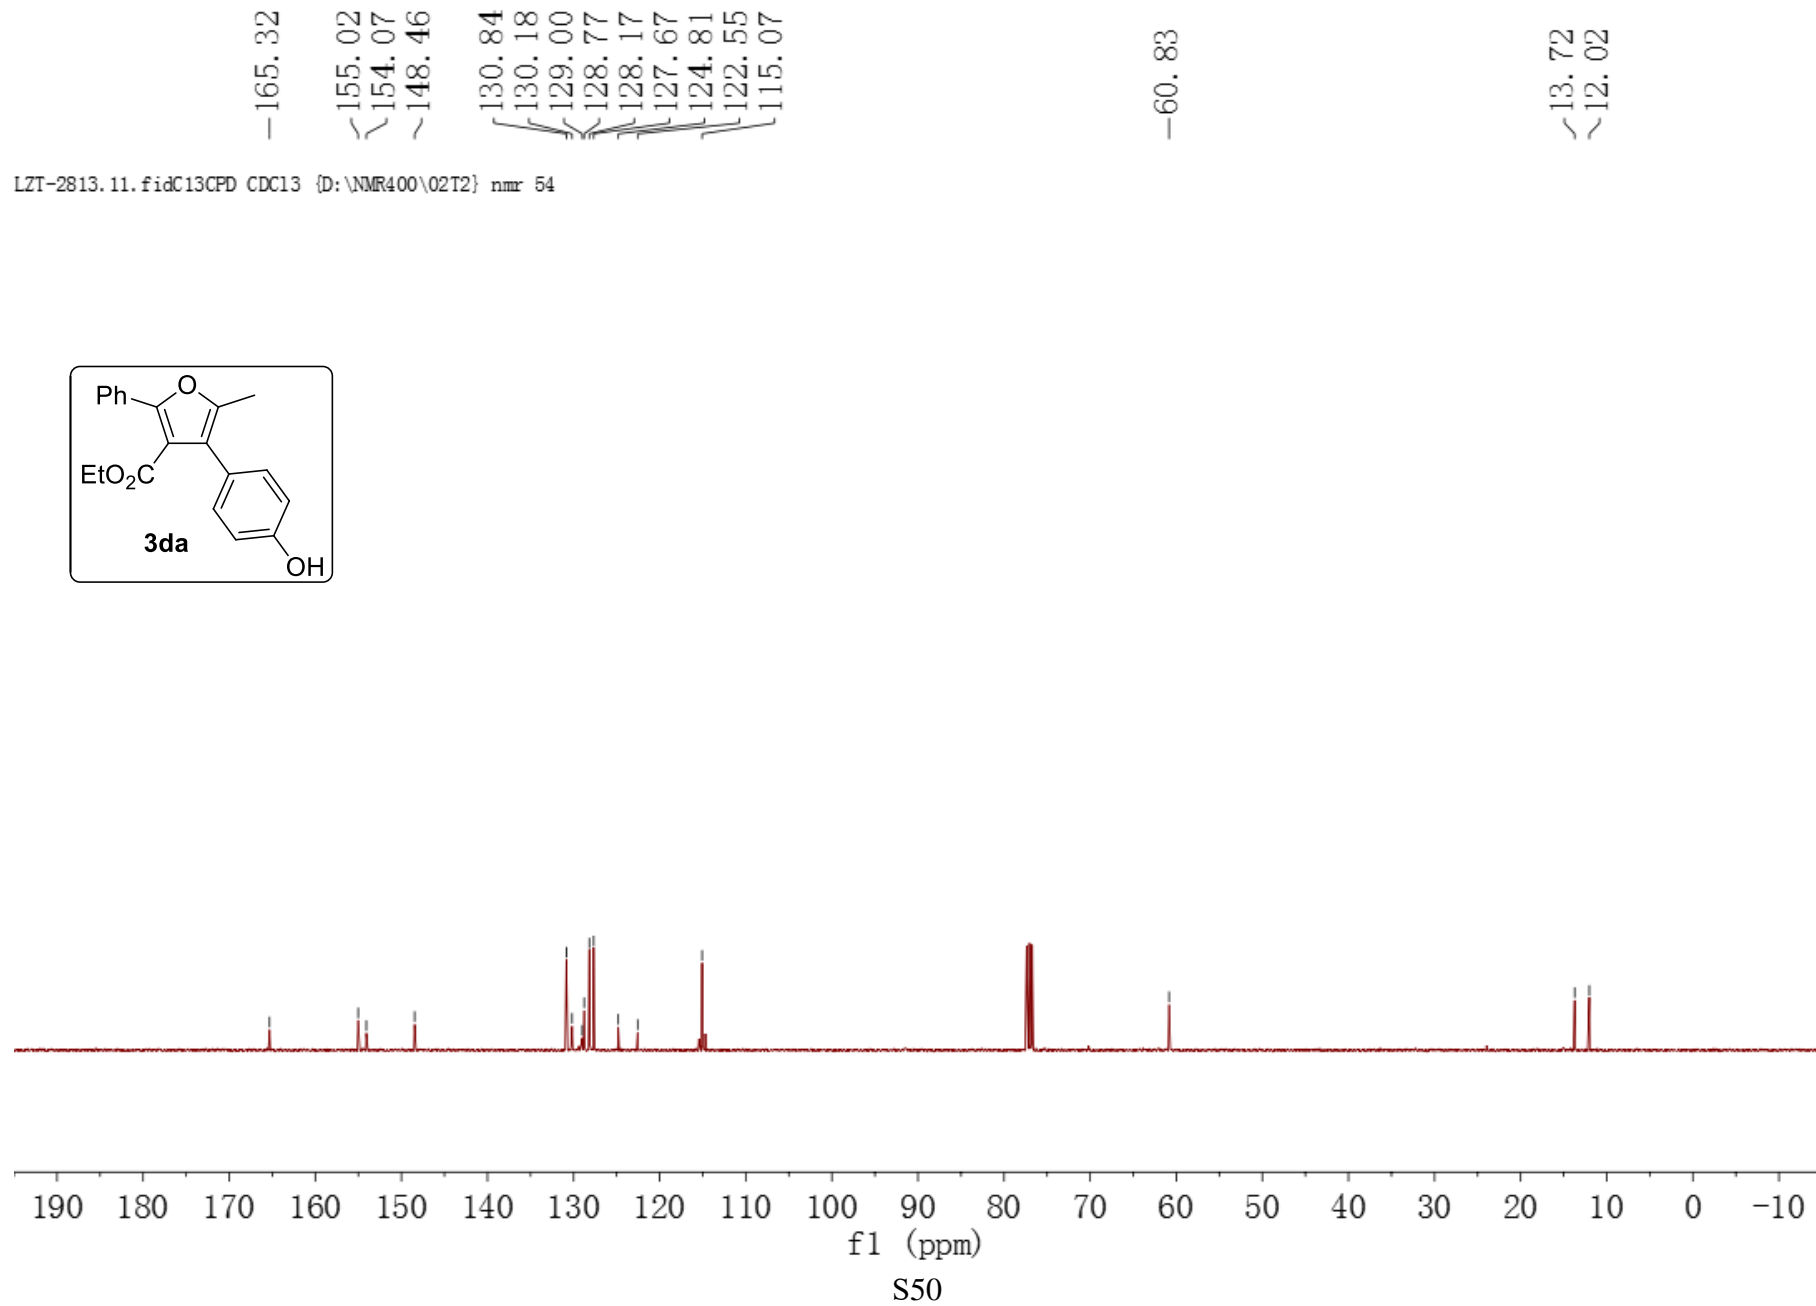

7.85  
7.84  
7.84  
7.83  
7.83  
7.82  
7.82  
7.66  
7.64  
7.45  
7.45  
7.44  
7.43  
7.43  
7.42  
7.41  
7.40  
7.40  
7.40  
7.39  
7.38  
7.37  
7.37  
7.36  
7.36  
4.12  
4.10  
4.08  
4.07

-2.32

1.00  
0.98  
0.97

LZT-2107-1.10.fid  
PROTON CDC13 {D:\NMR400\02T2} nmr 31

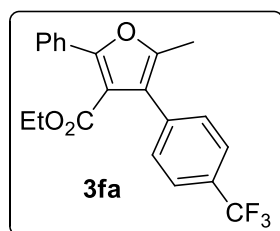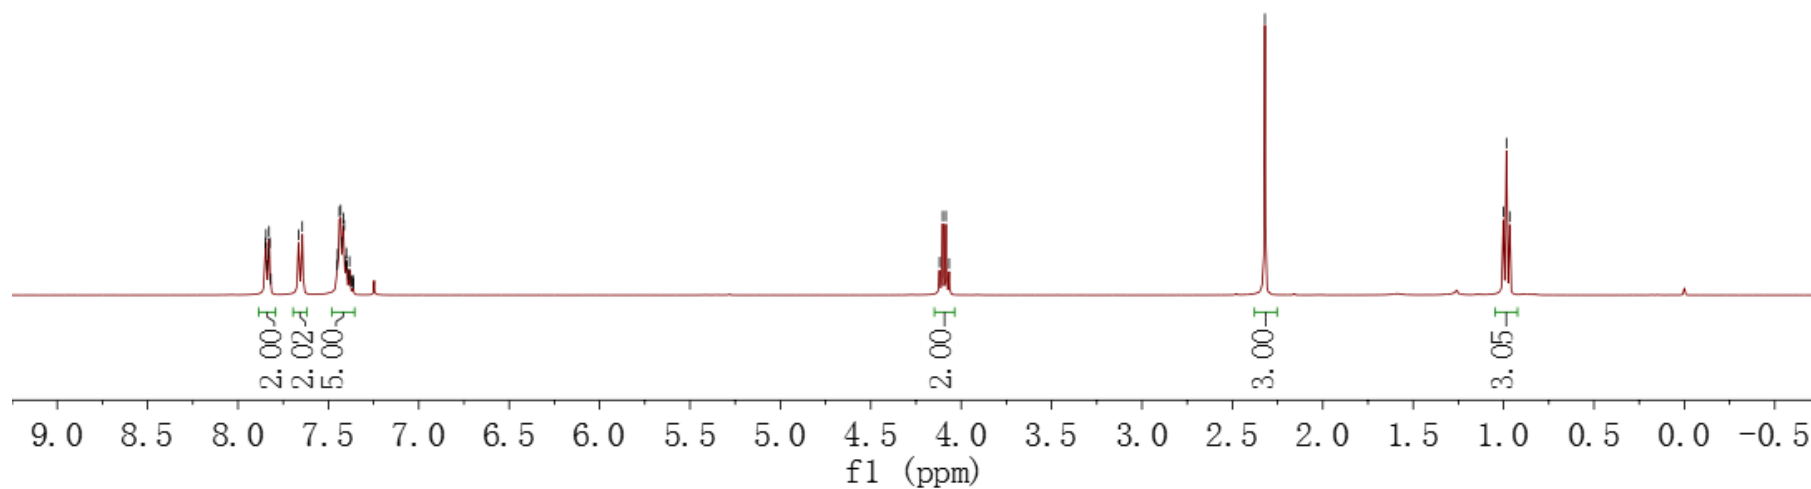

S51

LZT-2107-1.11.fid  
 C13CPD CDC13 {D:\NMR400\02T2} nmr 31

-164.14  
 -154.92  
 -148.95  
 -137.01  
 -130.03  
 -129.84  
 -129.34  
 -129.08  
 -129.02  
 -128.19  
 -127.90  
 -125.64  
 -124.96  
 -124.92  
 -124.88  
 -124.84  
 -122.93  
 -121.94  
 -114.34

-60.60

~13.59  
~12.05

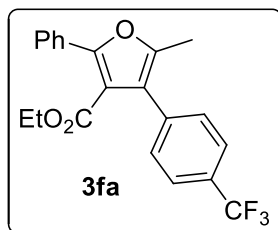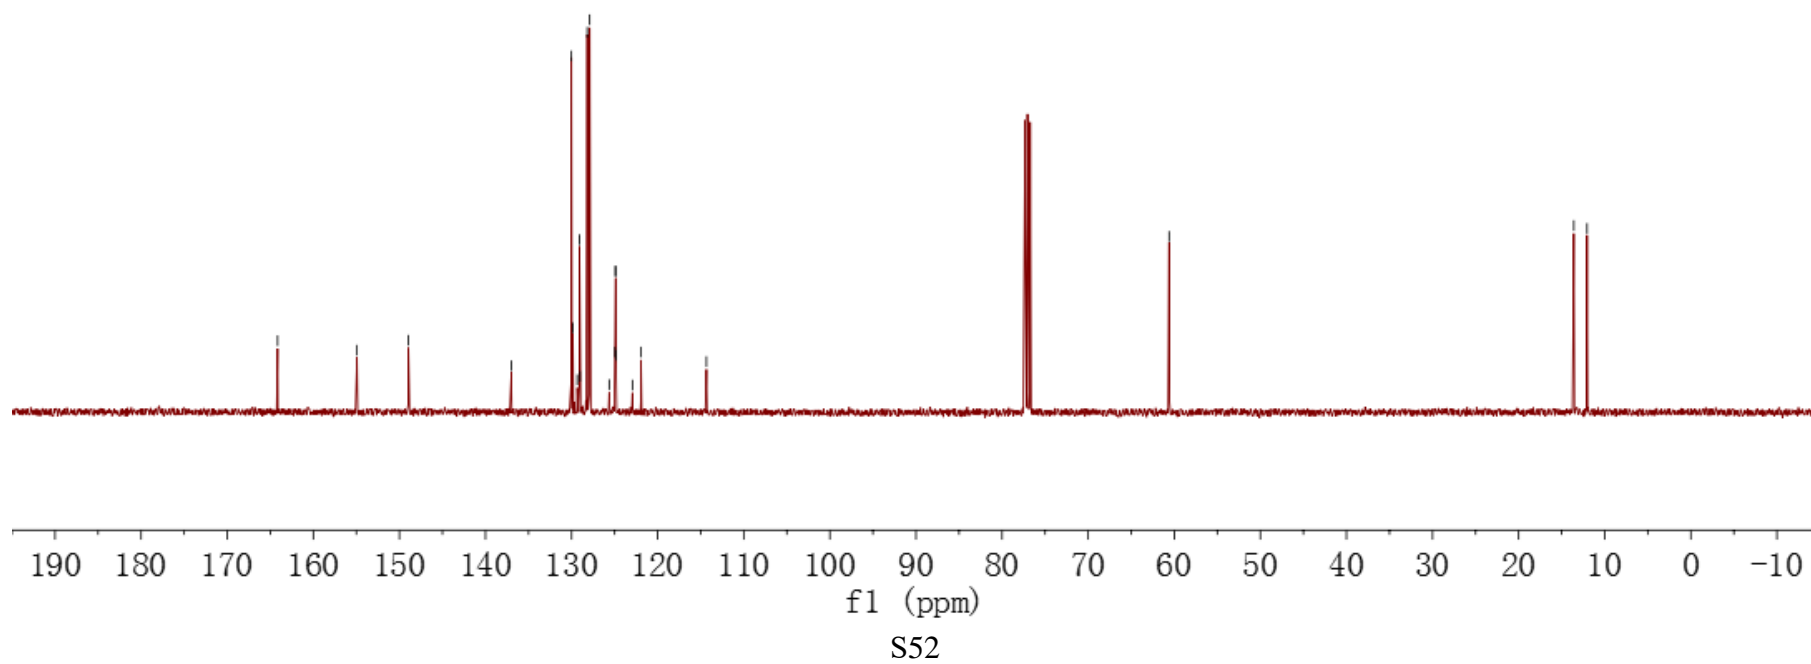

7.83  
7.83  
7.82  
7.82  
7.81  
7.81  
7.44  
7.44  
7.43  
7.42  
7.41  
7.40  
7.40  
7.38  
7.38  
7.38  
7.36  
7.29  
7.28  
7.27  
7.27  
7.26  
7.25  
7.24  
7.10  
7.10  
7.09  
7.08  
7.08  
7.07  
7.06  
4.12  
4.11  
4.09  
4.07  
2.30  
2.29  
1.03  
1.01  
0.99

LZT-2064.10.fid  
PROTON CDC13 {D:\NMR400\02T2} nmr 54

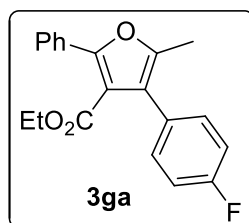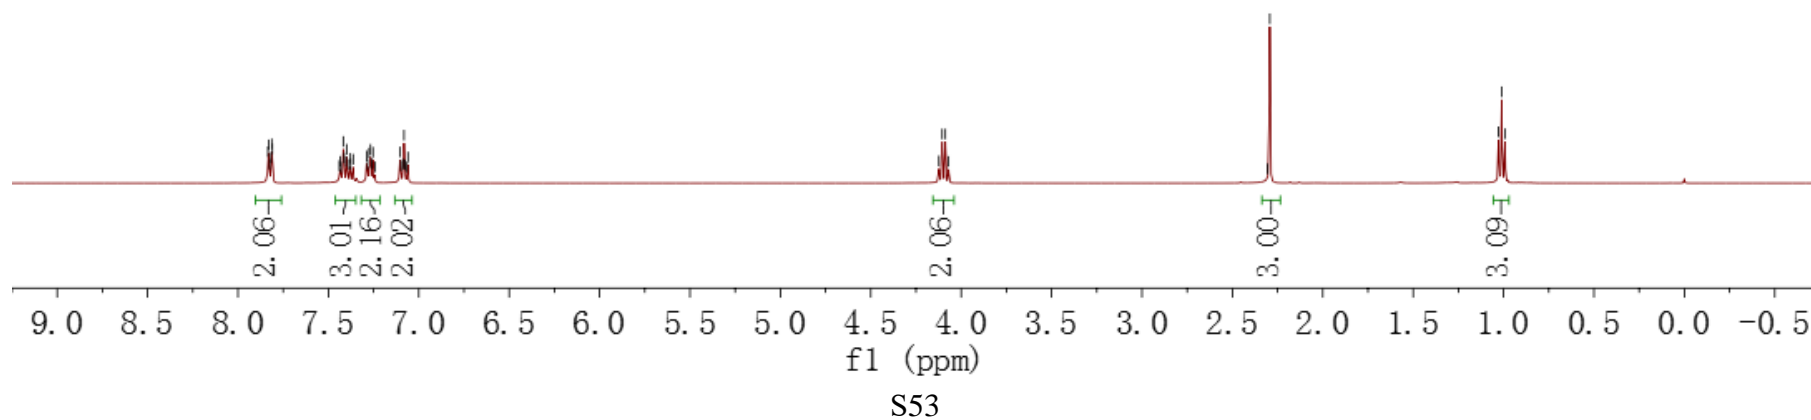

LZT-2064.11.fid  
 C13CPD CDC13 {D:\NMR400\02T2} nmr 54

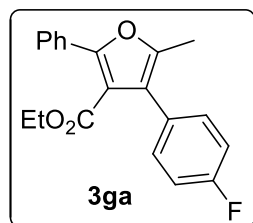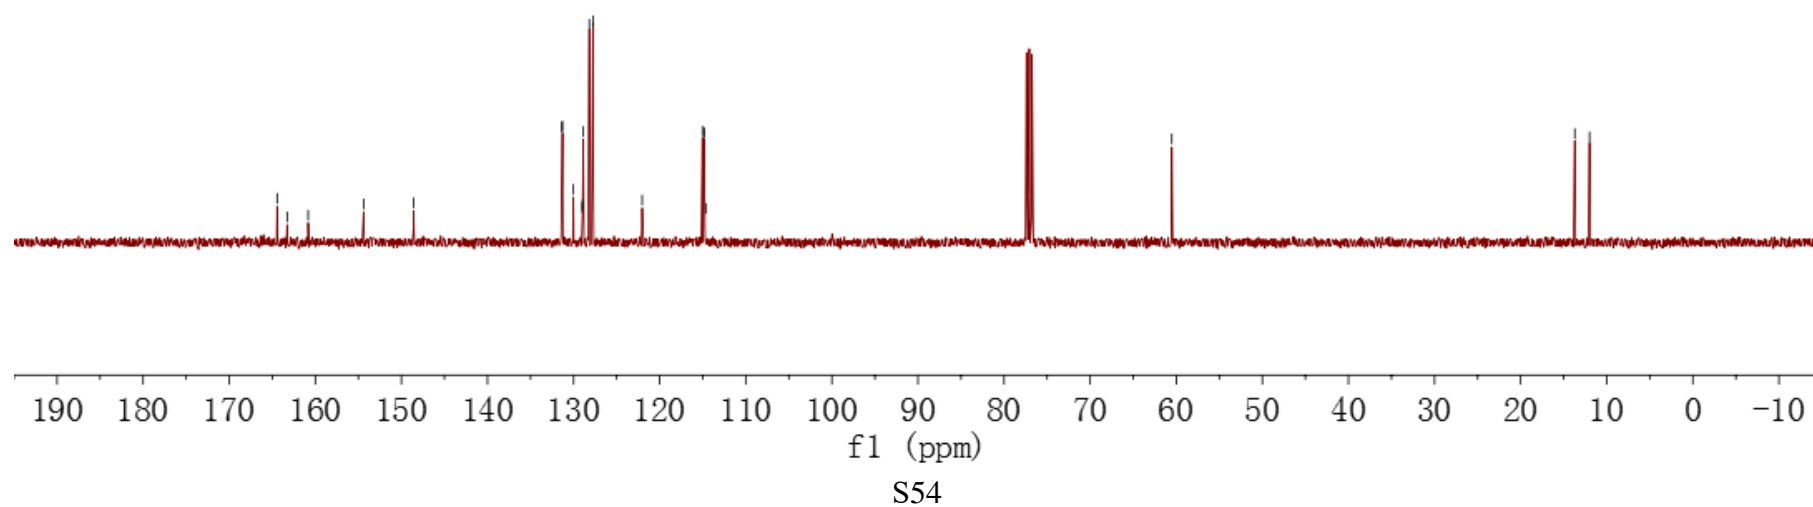

7.89  
7.89  
7.88  
7.87  
7.87  
7.44  
7.44  
7.43  
7.42  
7.42  
7.41  
7.40  
7.39  
7.38  
7.38  
7.37  
7.35  
7.33  
7.33  
7.32  
7.31  
7.31  
7.31  
7.30  
7.30  
7.29  
7.29  
7.28  
7.27  
7.26  
7.19  
7.19  
7.17  
7.17  
7.16  
7.15  
7.13  
7.13  
7.11  
7.11  
7.11  
7.09  
7.09  
4.11  
4.09  
4.08  
4.06  
2.29  
0.99  
0.97  
0.95

LZT-2099

PROTON CDC13 {D:\NMR400\02T2} nmr 10

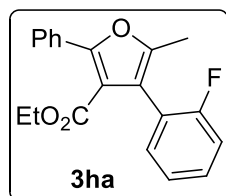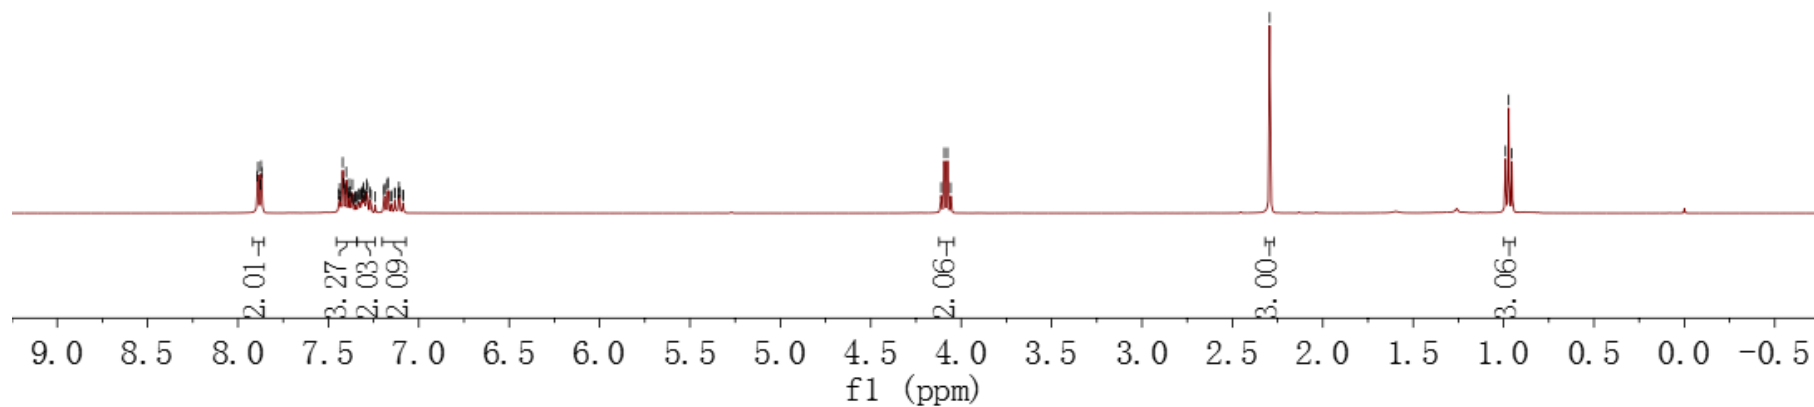

S55

LZT-2099

C13CPD CDC13 {D:\NMR400\02T2} nmr 10

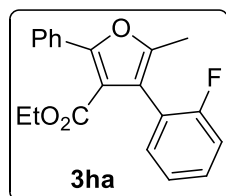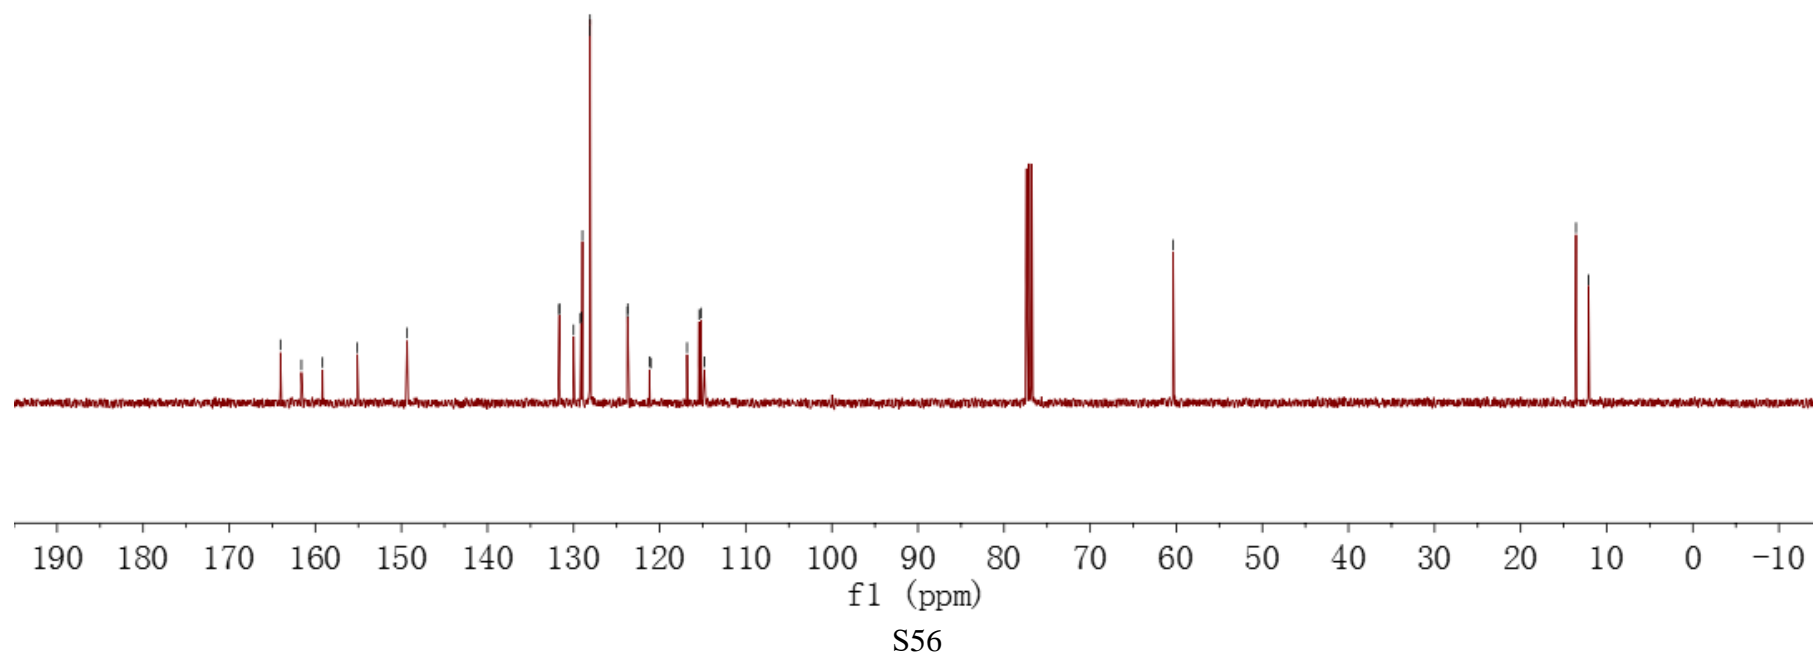



7.85  
7.84  
7.84  
7.83  
7.82  
7.82  
7.44  
7.44  
7.43  
7.42  
7.42  
7.41  
7.40  
7.39  
7.39  
7.38  
7.37  
7.37  
7.36  
7.35  
7.35  
7.34  
7.33  
7.33  
7.32  
7.09  
7.09  
7.08  
7.07  
7.07  
7.07  
7.05  
7.04  
7.04  
7.03  
7.03  
7.02  
7.02  
7.01  
7.01  
7.00  
7.00  
7.00  
4.13  
4.12  
4.10  
4.08  
2.32  
1.03  
1.01  
0.99

LZT-2091.10.fid  
PROTON CDC13 {D:\NMR400\02T2} nmr 24

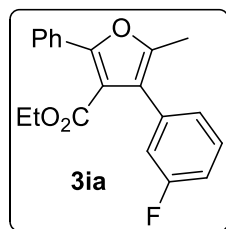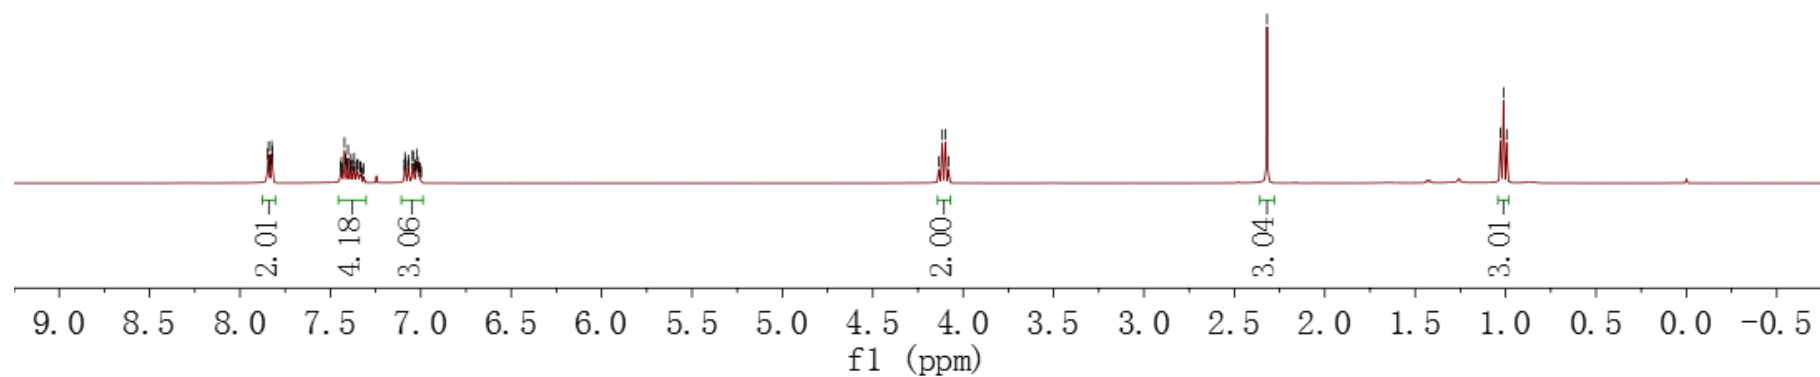

LZT-2091.11.fid  
C13CPD CDC13 {D:\NMR400\02T2} nmr 24

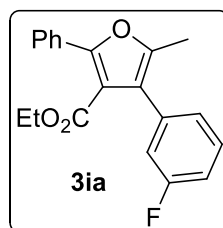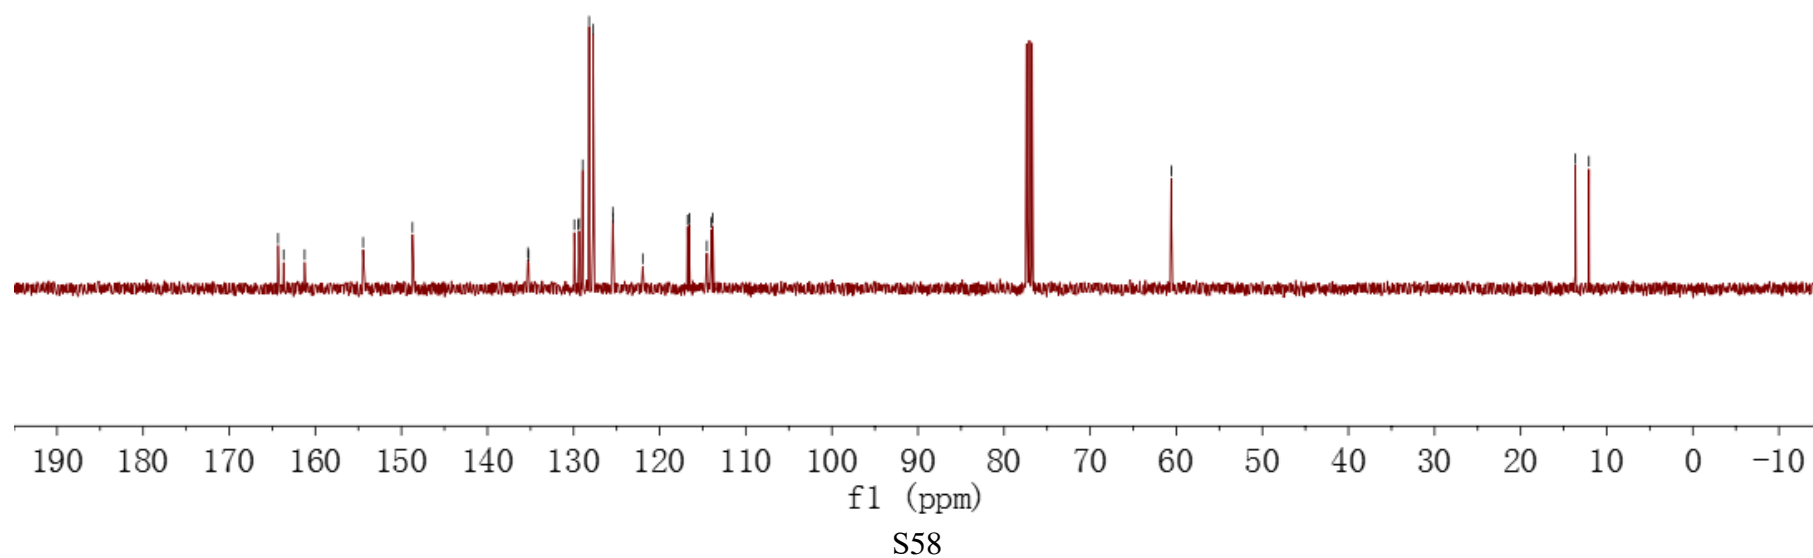

7.80 7.80 7.79 7.78 7.78 7.78 7.43 7.43 7.42 7.41 7.41 7.40 7.39 7.38 7.38 7.37 7.37 7.36 7.35 7.34 7.34 7.33 7.33 7.08 7.07 7.06 7.06 7.03 7.02 7.02 7.02 4.19 4.17 4.15 4.14 2.39 1.11 1.09 1.07

LZT-2153-1

PROTON CDC13 {D:\NMR400\02T2} nmr 49

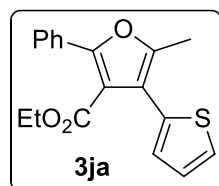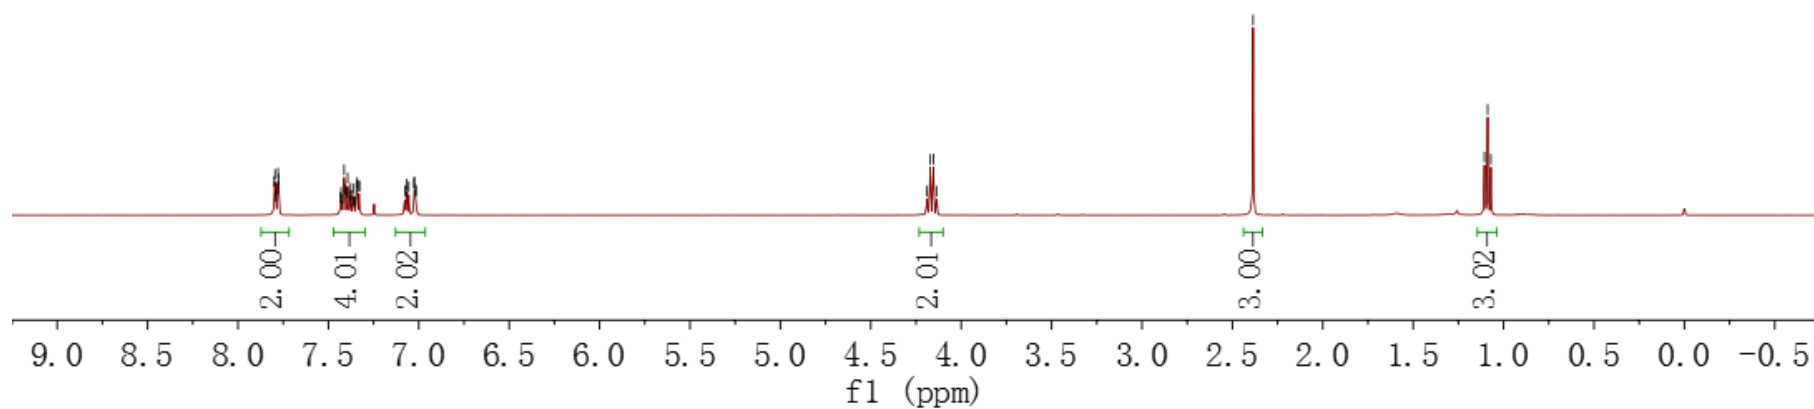

S59

LZT-2153-1

C13CPD CDC13 {D:\NMR400\02T2} nmr 49

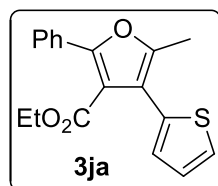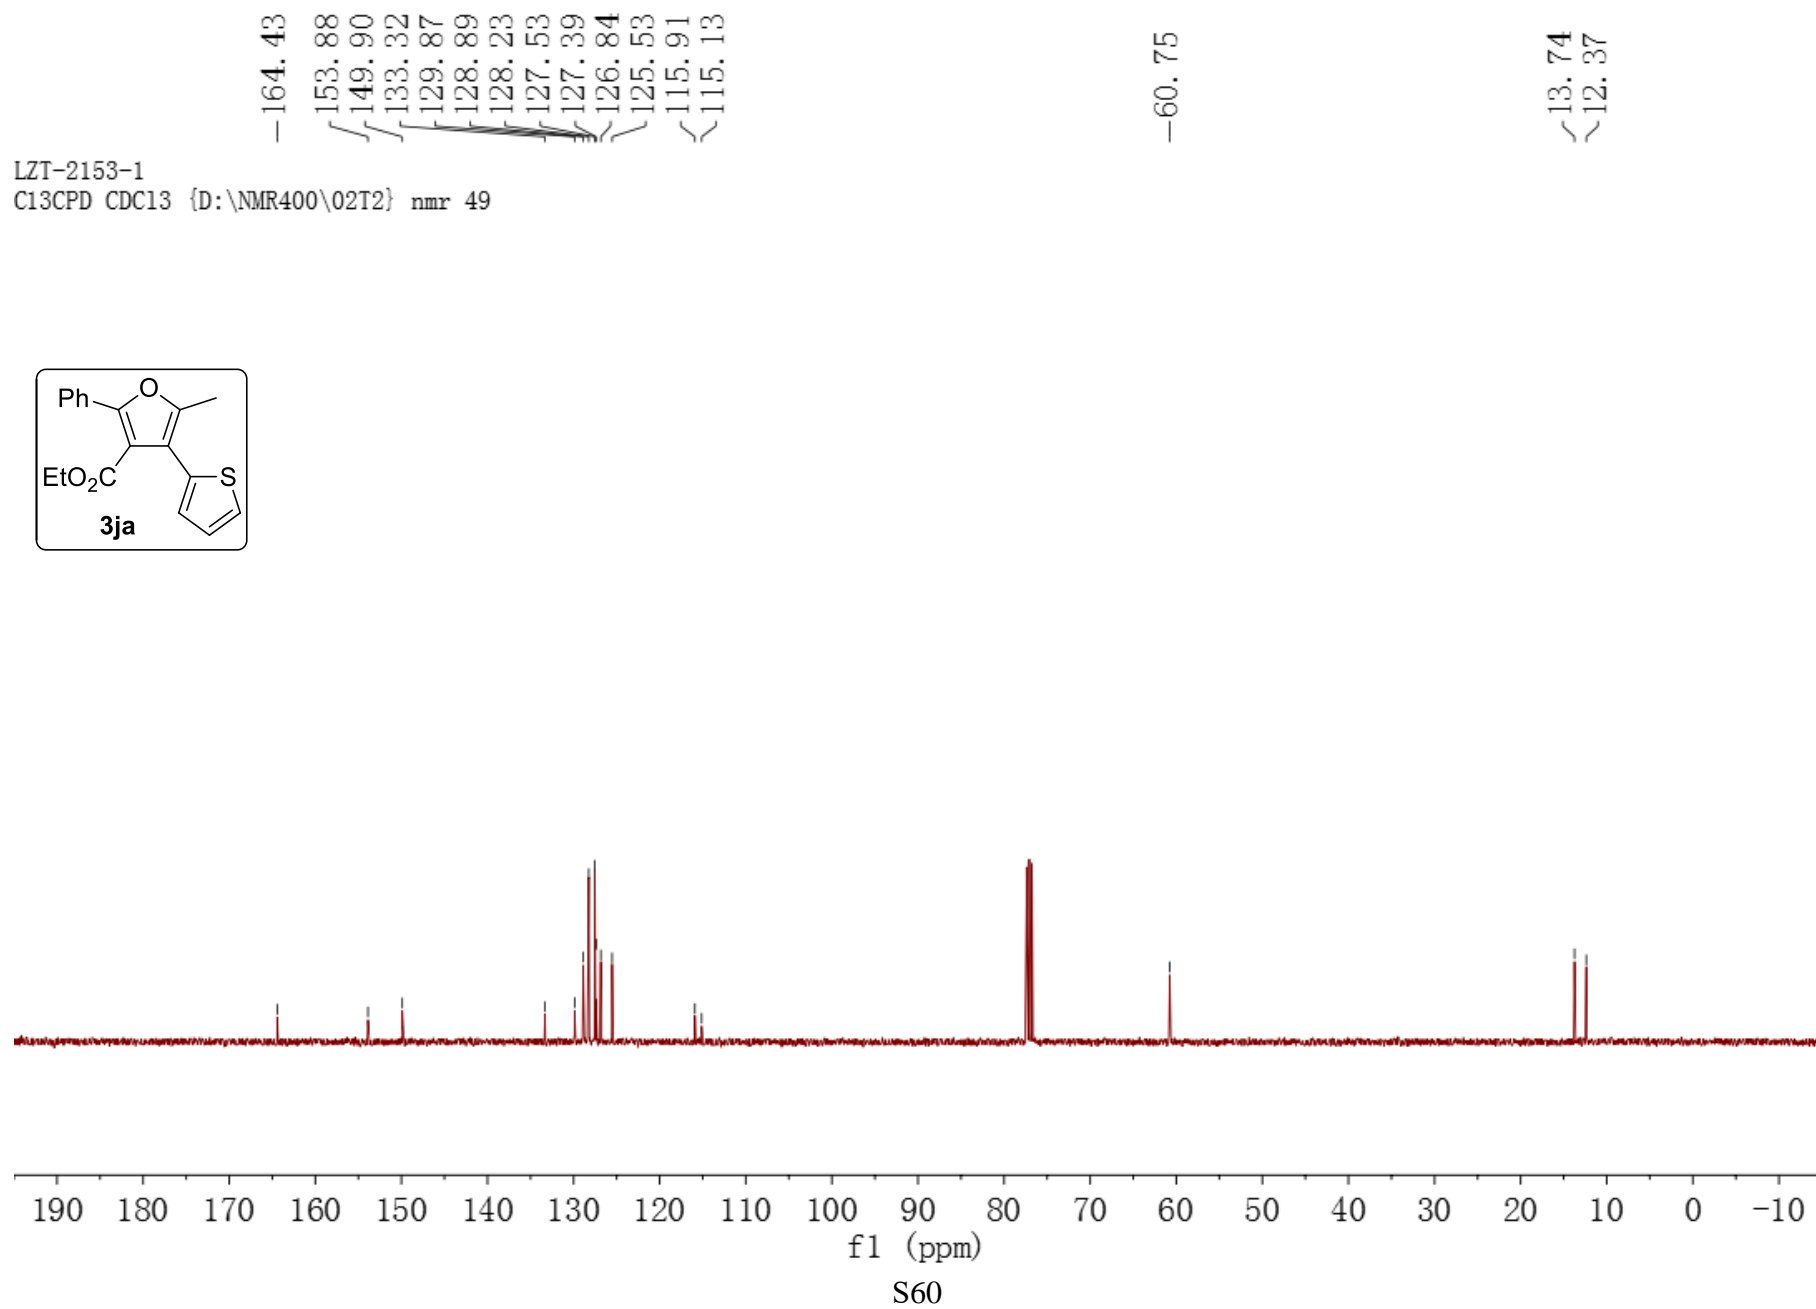

7.76  
7.76  
7.75  
7.74  
7.74  
7.74  
7.42  
7.41  
7.40  
7.40  
7.40  
7.39  
7.38  
7.38  
7.38  
7.37  
7.37  
7.36  
7.36  
7.35  
7.29  
7.29  
7.28  
7.27  
7.27  
7.27  
7.25  
7.25  
7.21  
7.21  
7.20  
7.19  
7.17  
7.17  
7.16  
7.15  
7.15  
7.15  
4.33  
4.31  
4.29  
4.27  
2.86  
2.85  
2.84  
2.84  
2.83  
1.99  
1.32  
1.30  
1.28

LZT-2066.10.fid  
PROTON CDC13 {D:\NMR400\02T2} nmr 8

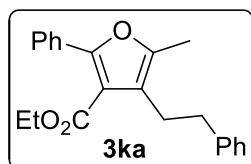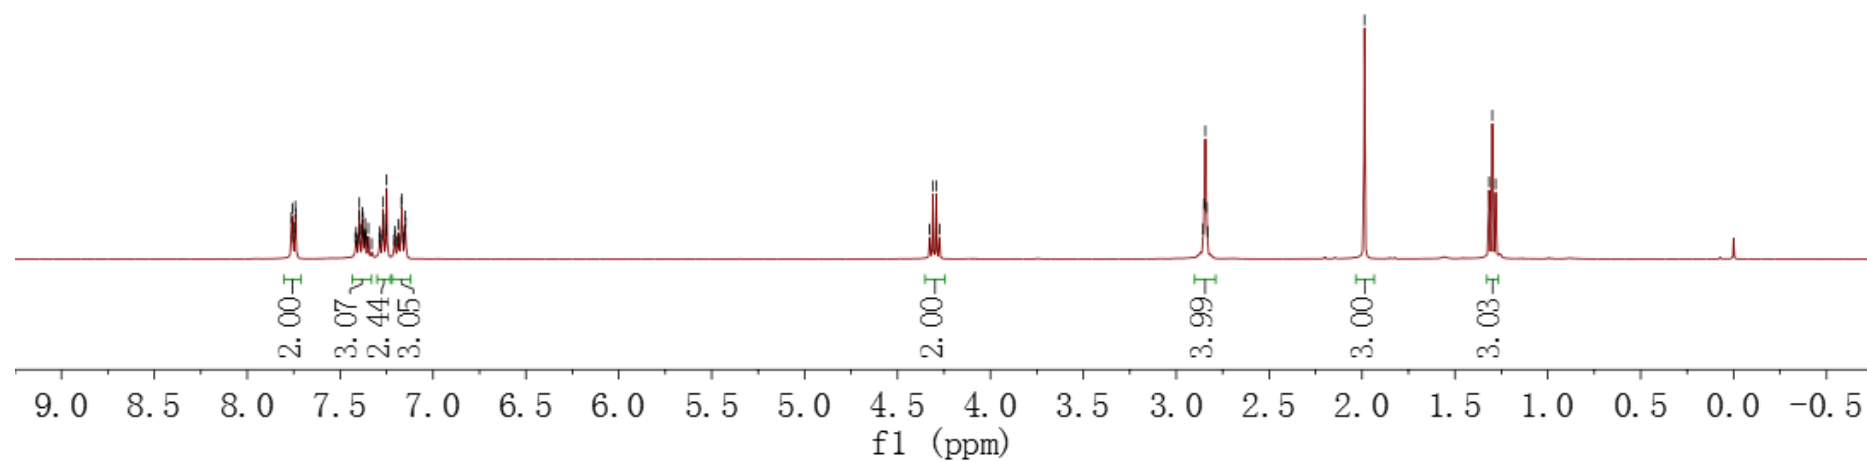

LZT-2066.11.fidC13CPD CDC13 {D:\NMR400\02T2} nmr 8

-164.65  
 -155.31  
 -148.51  
 -141.92  
 -130.60  
 -128.70  
 -128.67  
 -128.28  
 -128.26  
 -127.91  
 -125.86  
 -119.88  
 -113.92

-60.34

-36.78

-26.78

-14.16

-11.04

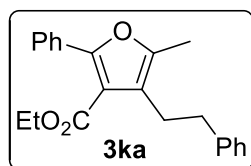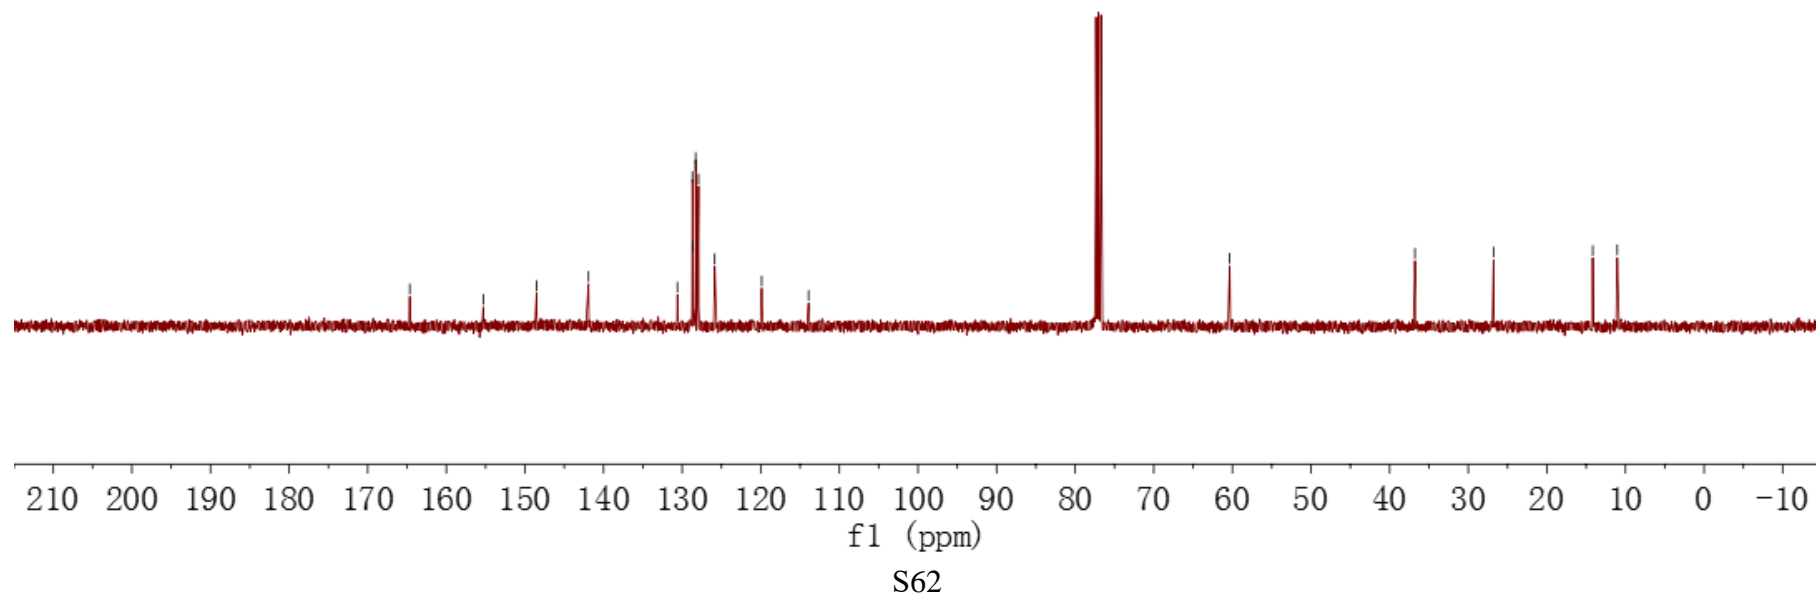

7.44  
7.44  
7.43  
7.42  
7.42  
7.41  
7.41  
7.24  
7.24  
7.23  
7.23  
7.22  
7.22  
7.21  
7.21  
7.20  
7.20  
7.20  
7.19  
7.19  
7.19  
7.18  
7.18  
7.17  
7.17  
7.16  
7.16  
7.16  
7.15  
7.14  
7.14  
7.13  
7.12  
7.06  
7.05  
7.05  
7.04  
7.04  
7.03  
7.03  
2.42

LZT-2773.10.fidPROTON CDC13 {D:\NMR400\02T2} nmr 13

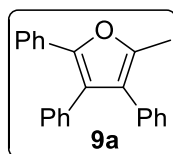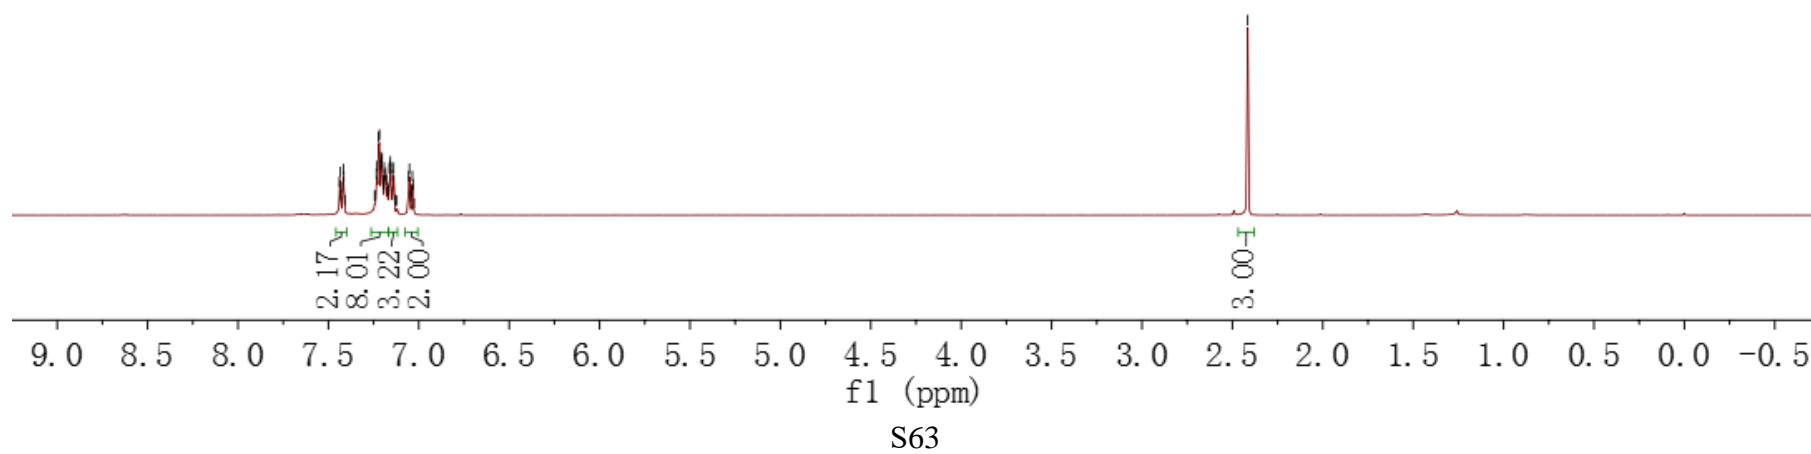

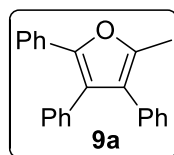

LZT-2773.11.fidC13CPD CDC13 {D:\NMR400\02T2} nmr 13

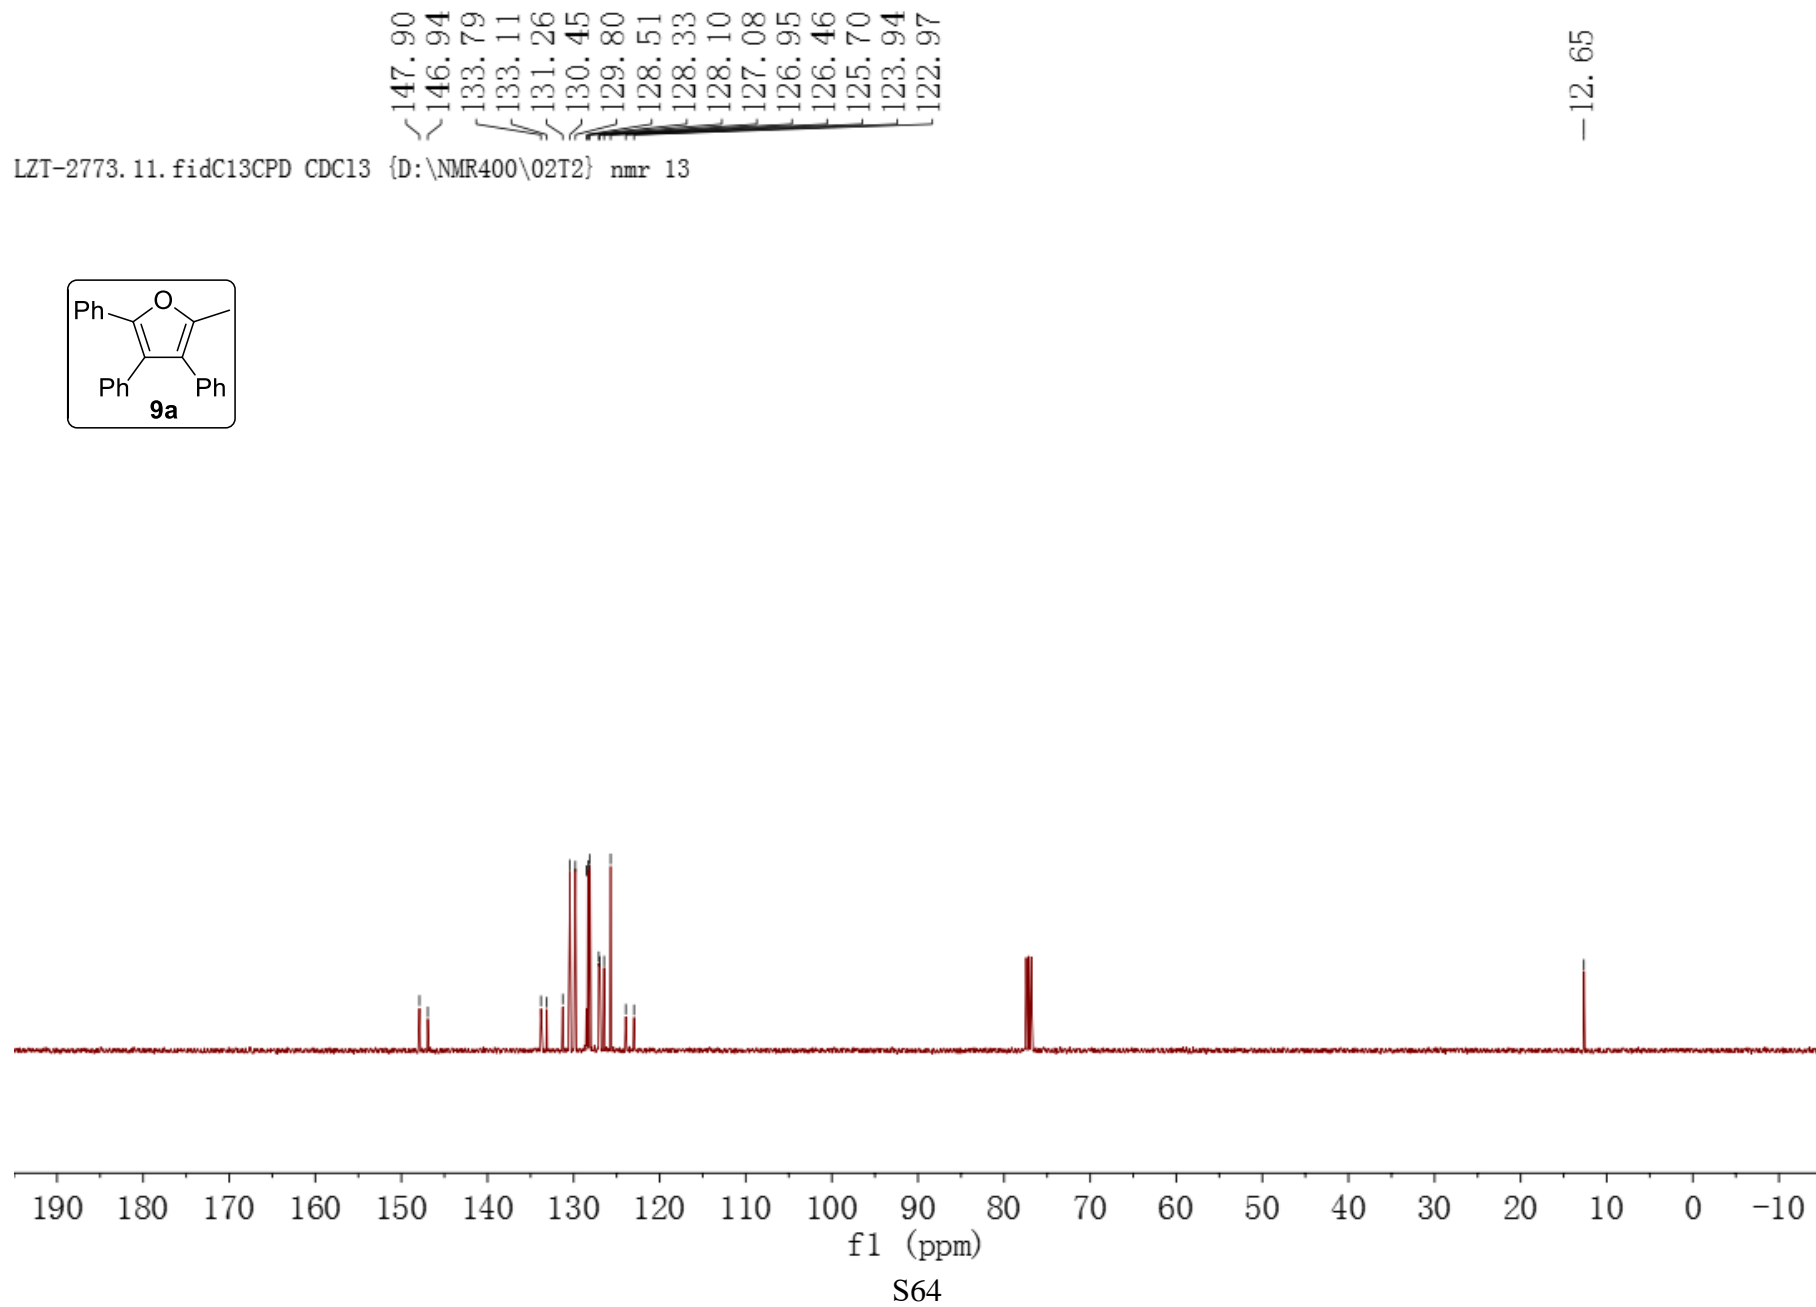



7.37  
7.36  
7.35  
7.34  
7.25  
7.24  
7.24  
7.24  
7.23  
7.23  
7.22  
7.22  
7.21  
7.21  
7.21  
7.20  
7.19  
7.19  
7.17  
7.15  
7.15  
7.14  
7.13  
7.13  
7.06  
7.06  
7.05  
7.04  
7.04  
6.78  
6.78  
6.77  
6.76  
3.42

LZT-2783.10.fidPROTON CDC13 {D:\NMR400\02T2} nmr 57

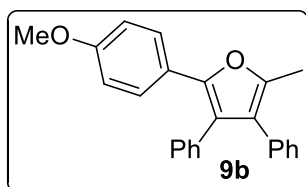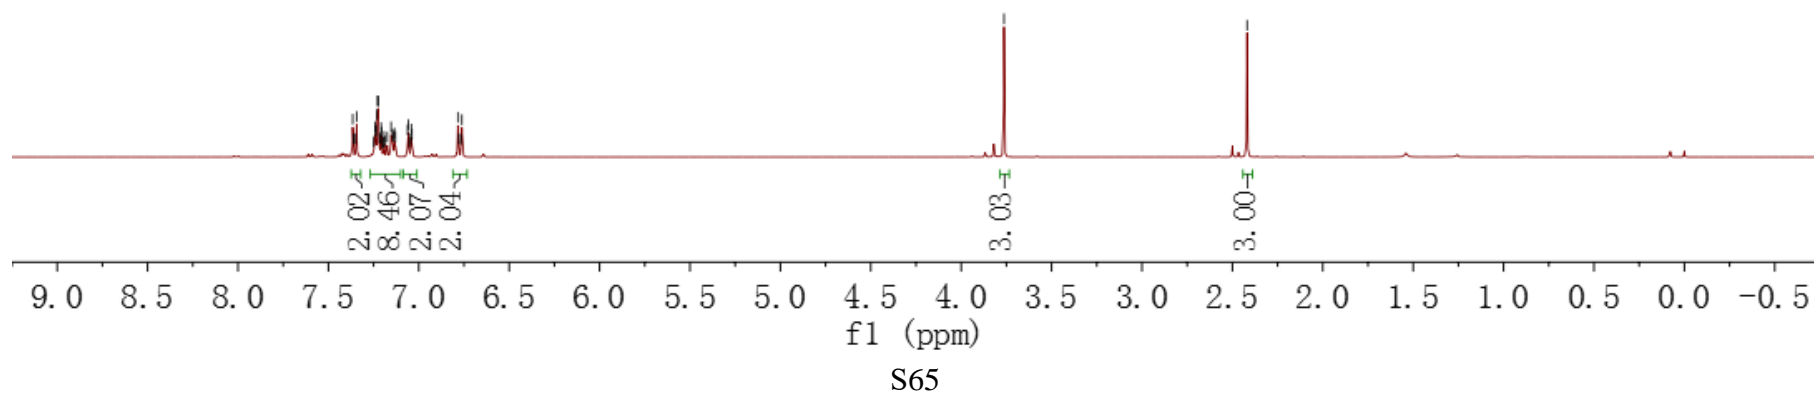

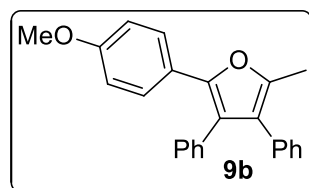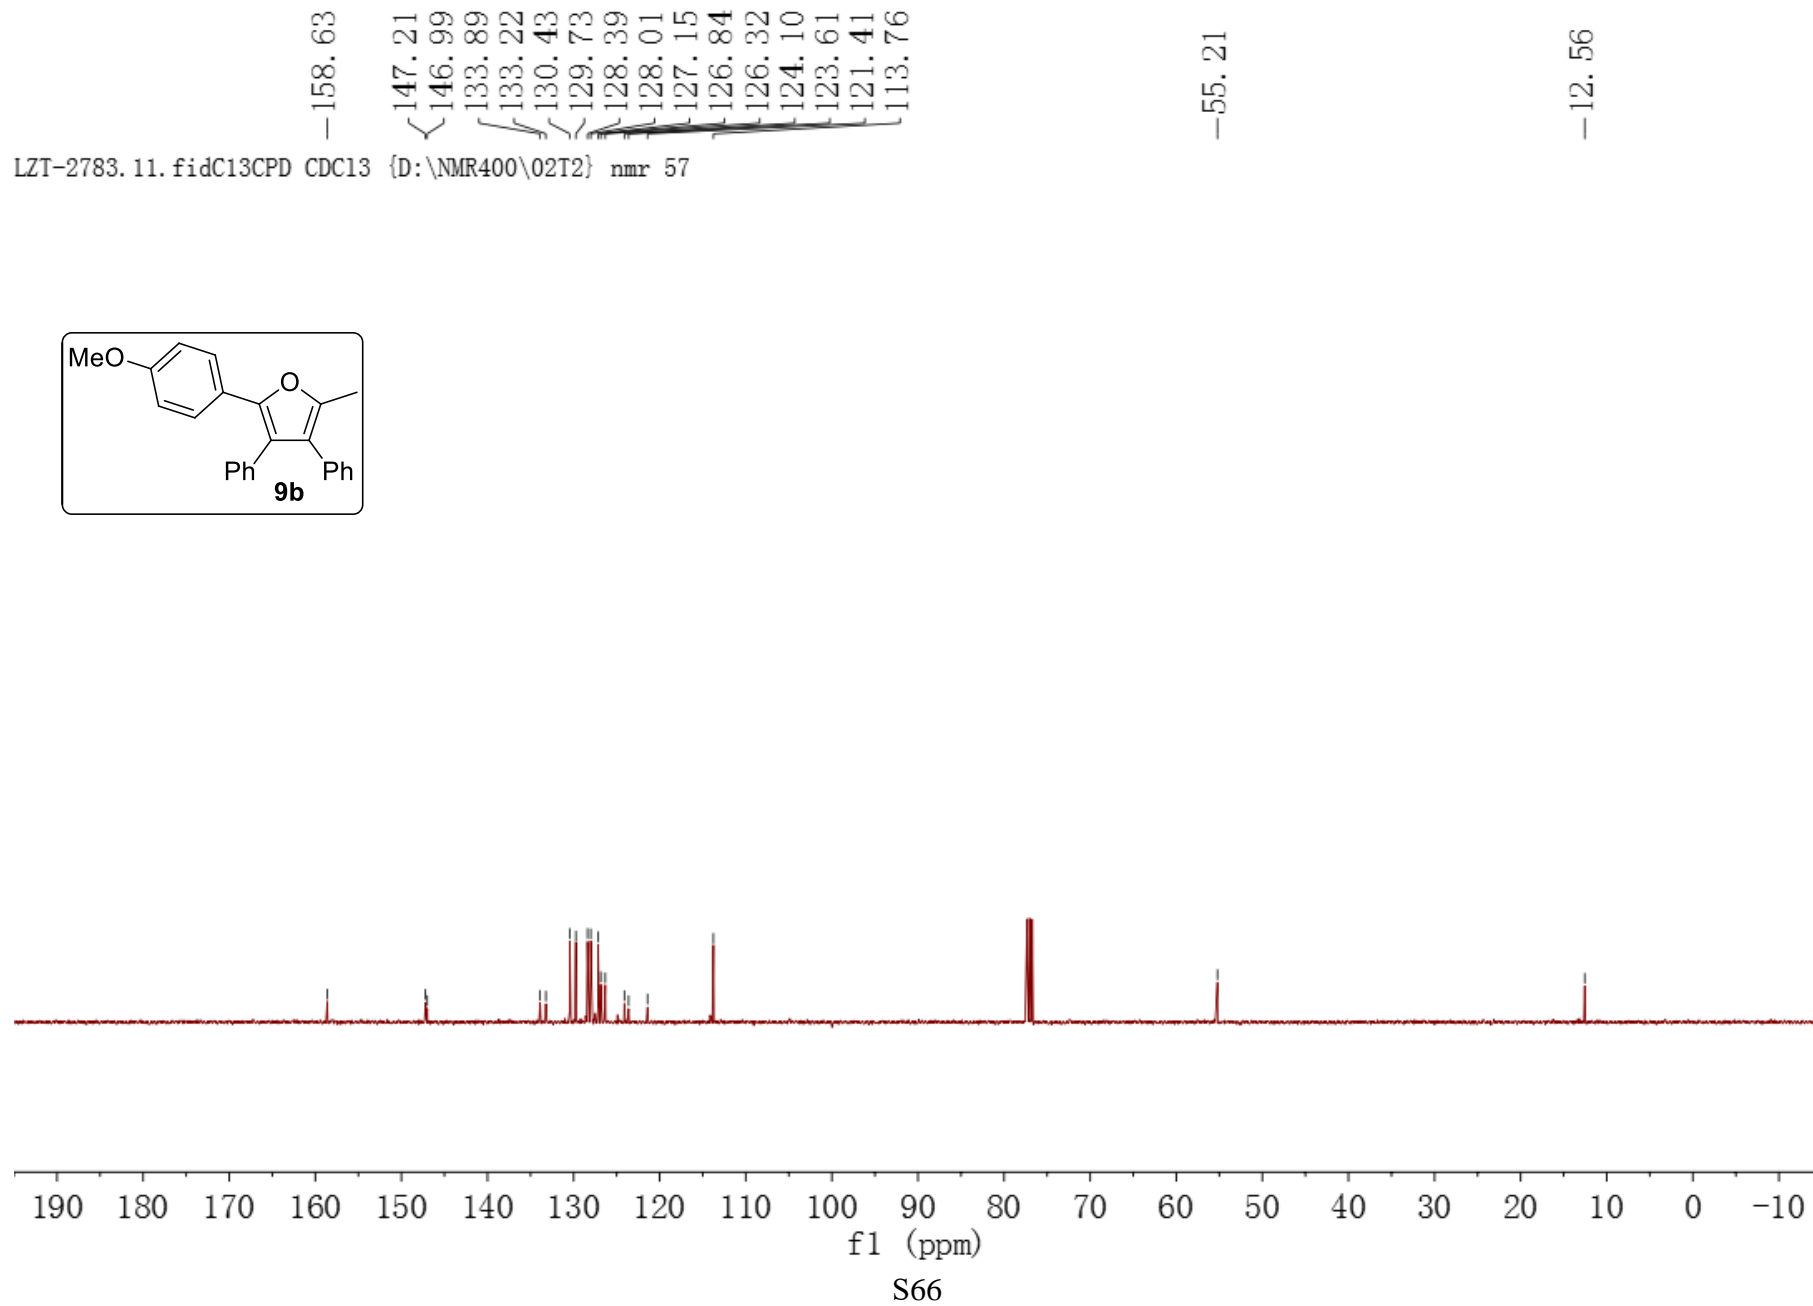

7.42  
7.40  
7.40  
7.39  
7.38  
7.38  
7.38  
7.37  
7.36  
7.26  
7.26  
7.26  
7.25  
7.25  
7.24  
7.24  
7.23  
7.22  
7.21  
7.21  
7.21  
7.20  
7.20  
7.20  
7.19  
7.19  
7.18  
7.14  
7.14  
7.14  
7.13  
7.13  
7.13  
7.12  
7.12  
7.06  
7.06  
7.05  
7.05  
7.04  
7.04  
7.03  
6.93  
6.93  
6.92  
6.92  
6.91  
6.91  
6.90  
6.89  
2.42

LZT-2782.10.fidPROTON CDC13 {D:\NMR400\02T2} nmr 38

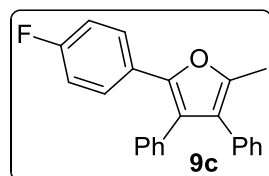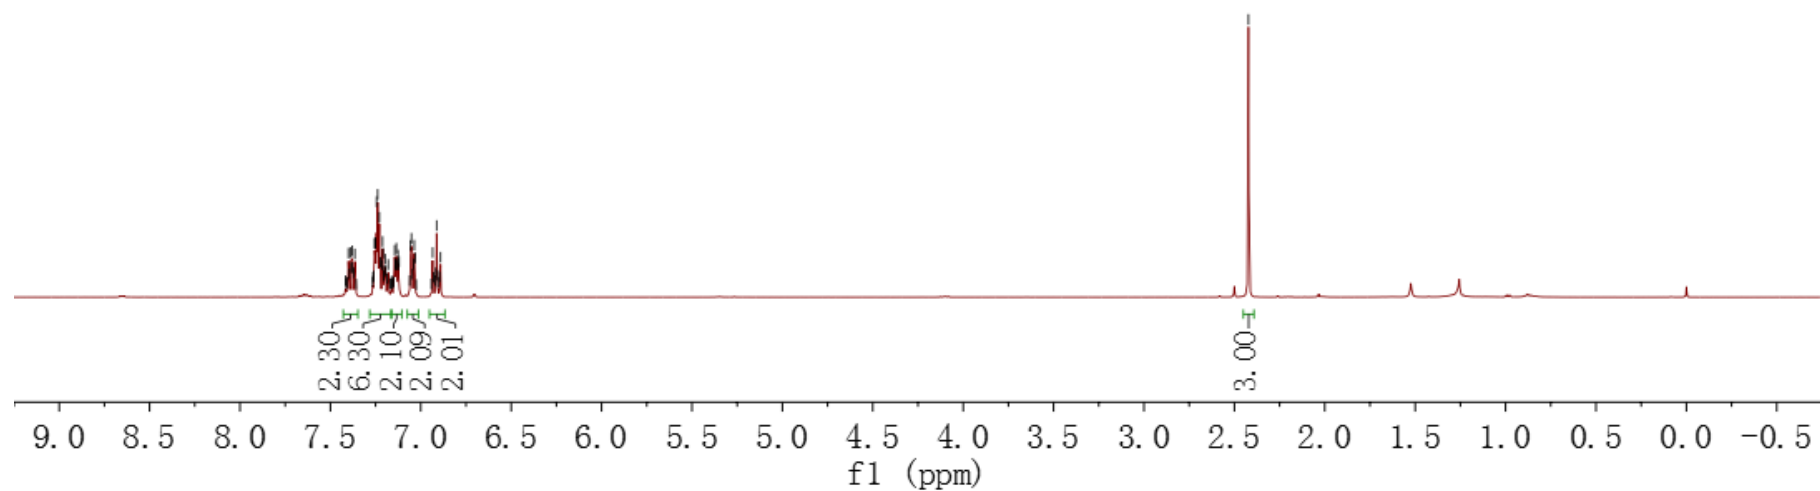

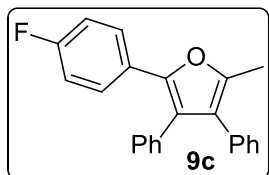

LZT-2782.11.fidC13CPD CDC13 {D:\NMR400\02T2} nmr 38

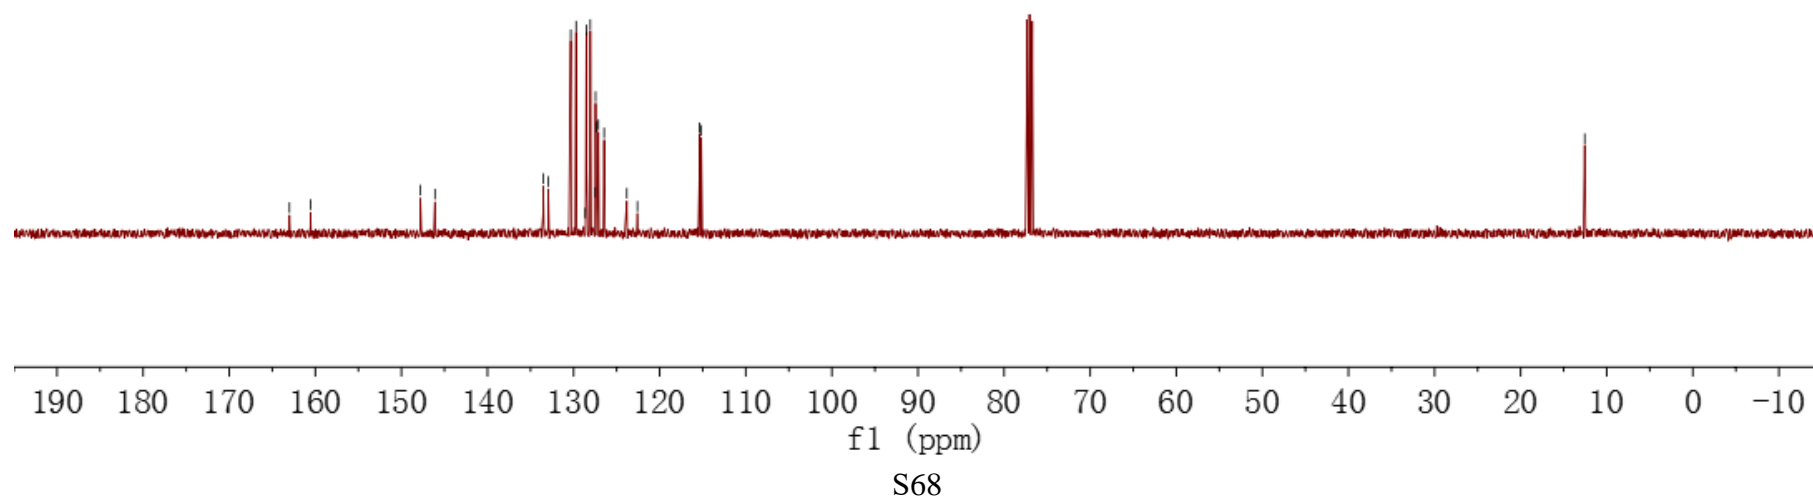

7.45  
7.45  
7.44  
7.44  
7.43  
7.43  
7.42  
7.42  
7.42  
7.41  
7.25  
7.24  
7.24  
7.23  
7.23  
7.23  
7.22  
7.22  
7.22  
7.21  
7.21  
7.20  
7.20  
7.20  
7.20  
7.19  
7.19  
7.19  
7.18  
7.17  
7.17  
7.16  
7.16  
7.16  
7.15  
7.15  
7.15  
7.14  
7.14  
7.13  
7.12  
7.07  
7.06  
7.06  
7.05  
7.05  
7.05  
7.04  
7.04  
2.41  
2.31

LZT-2780.10.fidPROTON CDC13 {D:\NMR400\02T2} nmr 36

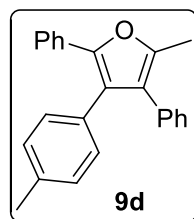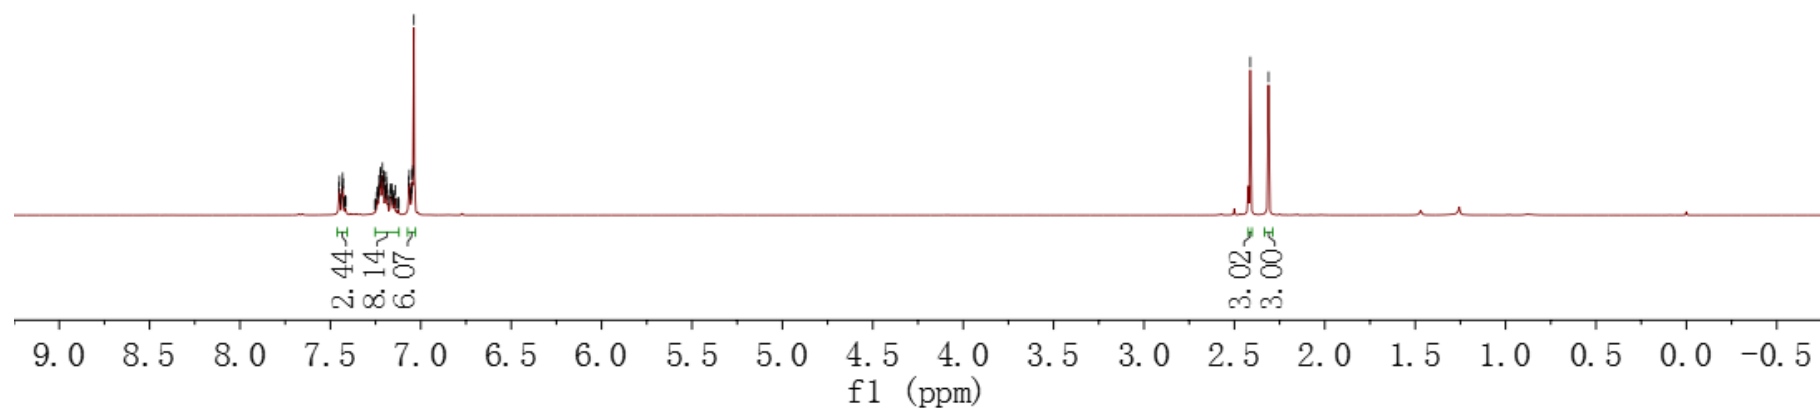

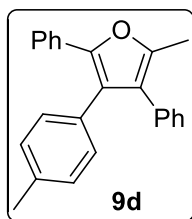

LZT-2780.11.fidC13CPD CDC13 {D:\NMR400\02T2} nmr 36

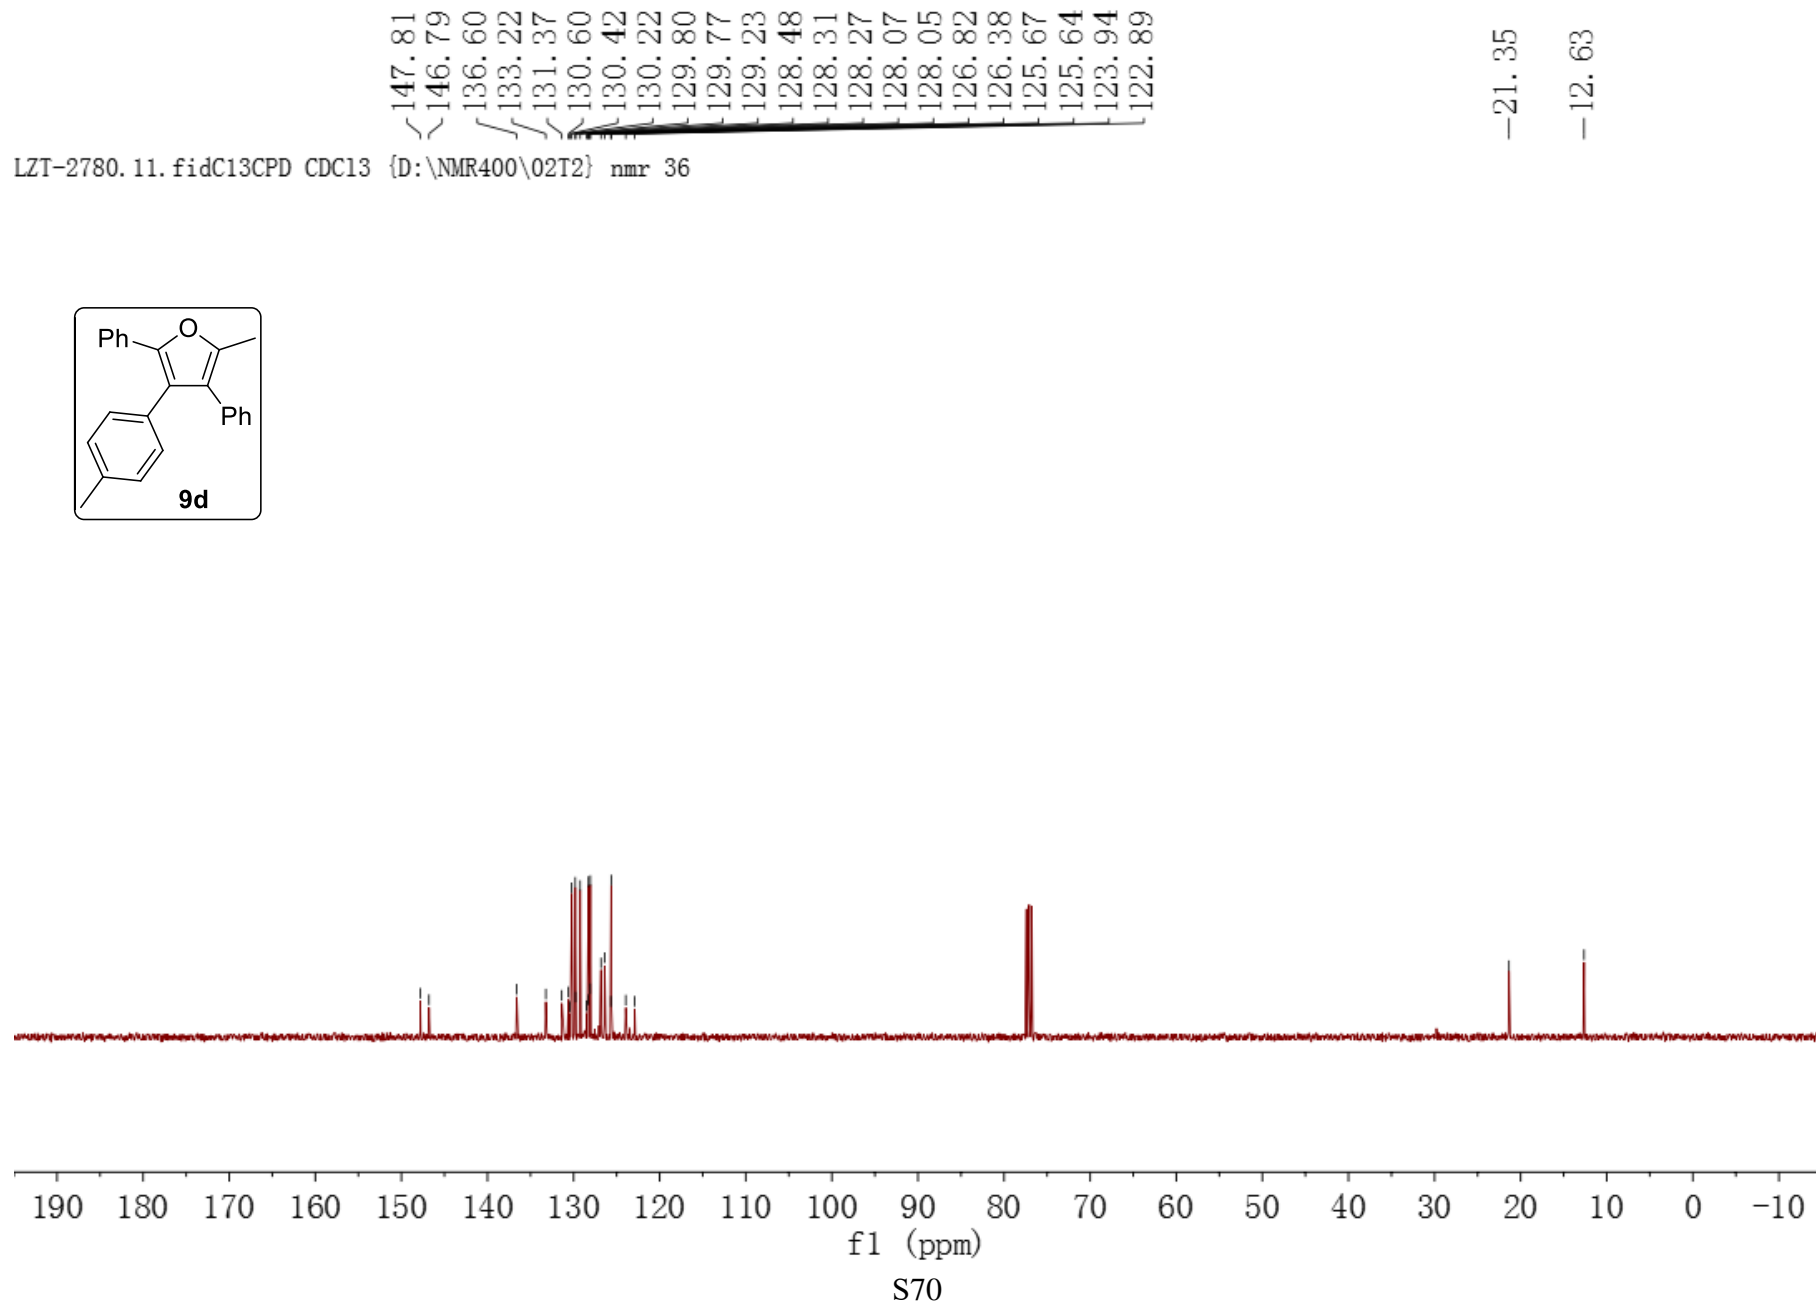

7.43  
7.43  
7.42  
7.42  
7.41  
7.41  
7.40  
7.27  
7.27  
7.26  
7.26  
7.26  
7.25  
7.25  
7.24  
7.23  
7.23  
7.22  
7.22  
7.21  
7.20  
7.18  
7.18  
7.18  
7.17  
7.16  
7.15  
7.15  
7.14  
7.14  
7.13  
7.12  
7.02  
7.01  
7.01  
7.00  
6.99  
6.98  
6.98  
6.95  
6.94  
6.93  
6.92  
6.92  
6.91  
6.90  
6.90  
2.41

LZT-2781.10.fidPROTON CDC13 {D:\NMR400\02T2} nmr 37

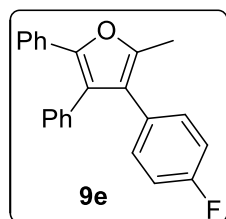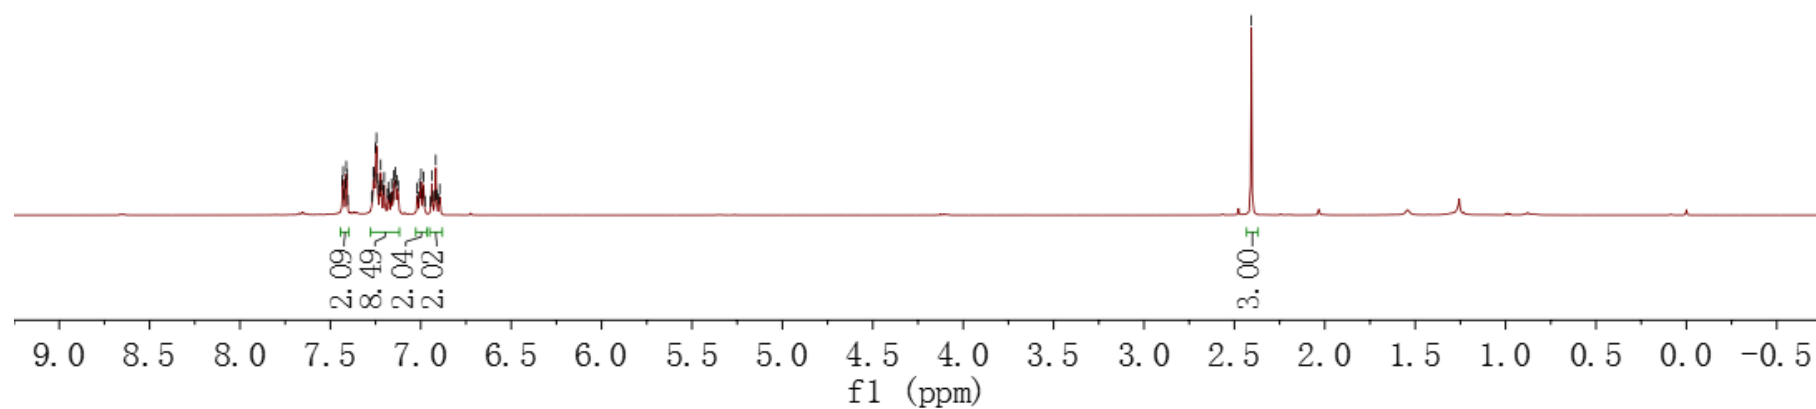

S71

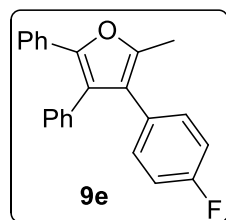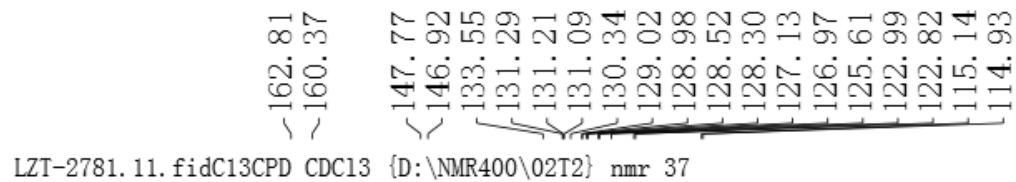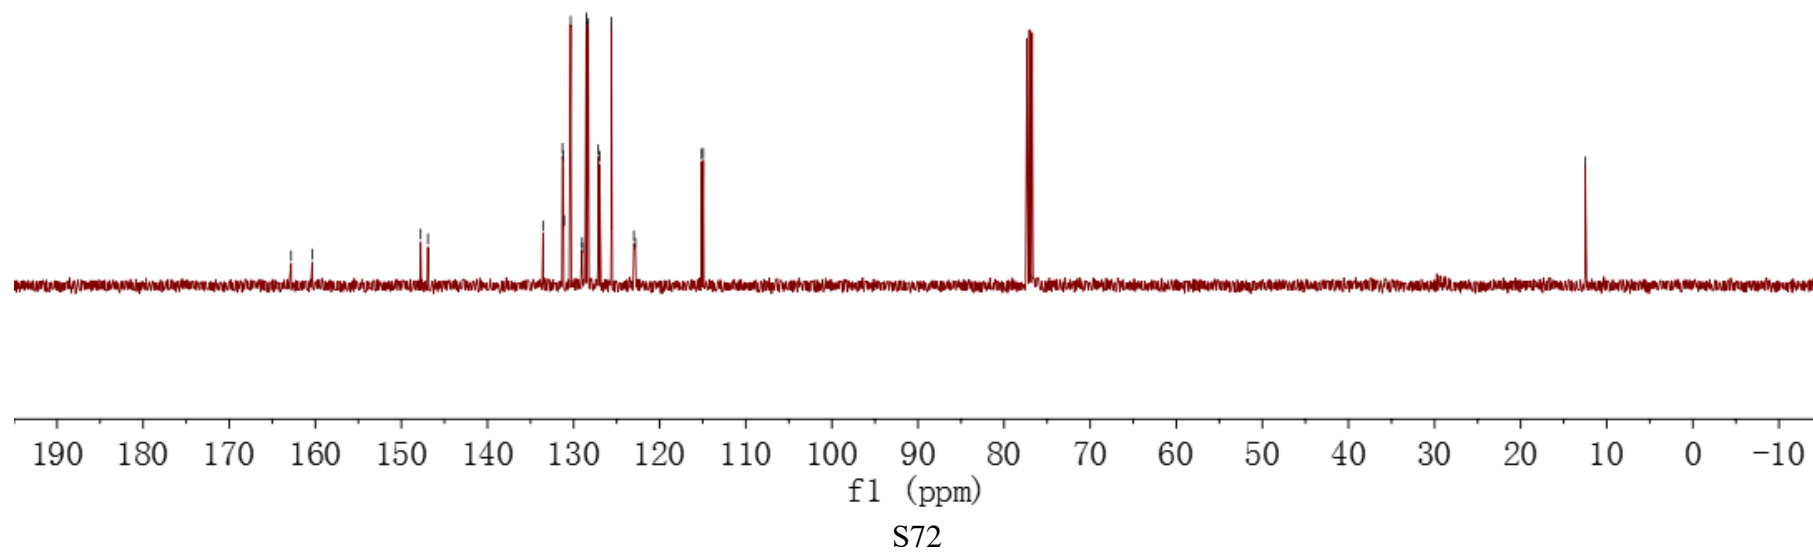

Supplement: c8cc08013e1.pdf [file c8cc08013e1.pdf]
